1 **TITLE**

2

3 Sex determination gene *transformer* regulates the male-female difference in *Drosophila*  
4 fat storage via the Adipokinetic hormone pathway

5

6 **AUTHORS**

7

8 Lianna W. Wat<sup>1</sup>, Zahid S. Chowdhury<sup>1</sup>, Jason W. Millington<sup>1</sup>, Puja Biswas<sup>1</sup>, Elizabeth J.  
9 Rideout<sup>1§</sup>

10

11 **AFFILIATIONS**

12

13 1 Department of Cellular and Physiological Sciences, Life Sciences Institute, The  
14 University of British Columbia, Vancouver, BC, Canada, V6T 1Z3

15

16 § Corresponding author

17

18 **RUNNING TITLE**

19

20 Adipokinetic hormone pathway regulates the sex difference in fat storage

21

22 **KEYWORDS**

23

24 *Drosophila*, fat storage, triglyceride, adipokinetic hormone, sex determination,

25 *transformer*, lifespan, fertility

26

27 **CORRESPONDING AUTHOR DETAILS**

28

29 Elizabeth J. Rideout, Life Sciences Center, 2350 Health Sciences Mall (RM3308),

30 Vancouver, BC, Canada V6T 1Z3. Email: [elizabeth.rideout@ubc.ca](mailto:elizabeth.rideout@ubc.ca) Phone: (604) 822-

31 0623. Fax: (604) 822-2316.

32

33 **ABSTRACT**

34

35 Sex differences in whole-body fat storage exist in many species. For example,  
36 *Drosophila* females store more fat than males. Yet, the mechanisms underlying this sex  
37 difference in fat storage remain incompletely understood. Here, we identify a key role for  
38 sex determination gene *transformer* (*tra*) in regulating the male-female difference in fat  
39 storage. Normally, a functional Tra protein is present only in females, where it promotes  
40 female sexual development. We show that loss of Tra in females reduced whole-body  
41 fat storage, whereas gain of Tra in males augmented fat storage. Tra's role in promoting  
42 fat storage was largely due to its function in neurons, specifically the Adipokinetic  
43 hormone (Akh)-producing cells (APCs). Our analysis of Akh pathway regulation  
44 revealed a male bias in APC activity and Akh pathway function, where this sex-biased  
45 regulation influenced the sex difference in fat storage by limiting triglyceride  
46 accumulation in males. Importantly, Tra loss in females increased Akh pathway activity,  
47 and genetically manipulating the Akh pathway rescued Tra-dependent effects on fat  
48 storage. This identifies sex-specific regulation of Akh as one mechanism underlying the  
49 male-female difference in whole-body triglyceride levels, and provides important insight  
50 into the conserved mechanisms underlying sexual dimorphism in whole-body fat  
51 storage.

52

## 53 INTRODUCTION

54

55 In animals, stored fat provides a rich source of energy to sustain basal metabolic  
56 processes, to survive periods of nutrient scarcity, and to support reproduction (Heier  
57 and Kühnlein, 2018; Heier et al., 2021; Walther and Farese, 2012). The main form of  
58 stored fat is triglyceride, which is deposited within specialized organelles called lipid  
59 droplets (Kühnlein, 2012; Murphy, 2001; Thiele and Spandl, 2008). Lipid droplets are  
60 found in many cell types throughout the body, but the main organ responsible for  
61 triglyceride storage is the adipose tissue (Murphy, 2001). The amount of triglyceride in  
62 the adipose tissue is regulated by many factors; however, one important factor that  
63 influences an individual's whole-body fat level is whether the animal is female or male  
64 (Karastergiou et al., 2012; Power and Schulkin, 2008; Sieber and Spradling, 2015; Wat  
65 et al., 2020). Typically, females store more fat than males. In mammals, females store  
66 approximately 10% more body fat than males (Jackson et al., 2002; Karastergiou et al.,  
67 2012; Womersley and Durnin, 1977). Female insects, on the other hand, can store up to  
68 four times more fat than males of the same species (Lease and Wolf, 2011) and break  
69 down fat more slowly than males when nutrients are scarce (Wat et al., 2020). These  
70 male-female differences in fat metabolism play a key role in supporting successful  
71 reproduction in each sex: females with reduced fat storage often show lower fecundity  
72 (Buszczak et al., 2002; Sieber and Spradling, 2015) whereas males with excess fat  
73 storage generally show decreased fertility (Grönke et al., 2005; Wat et al., 2020). Given  
74 that fat storage also influences diverse phenotypes such as immunity and lifespan  
75 (DiAngelo and Birnbaum, 2009; Gálíková and Klepsatel, 2018; Johnson and Stolzing,  
76 2019; Kamareddine et al., 2018; Liao et al., 2021; Roth et al., 2018; Suzawa et al.,  
77 2019), the sex-specific regulation of fat storage has implications for several life history  
78 traits. Yet, the genetic and physiological mechanisms that link biological sex with fat  
79 storage remain incompletely understood in many animals.

80 Clues into potential mechanisms underlying the sex difference in fat storage have  
81 emerged from studies on the regulation of triglyceride metabolism in *Drosophila*. While  
82 many pathways impact whole-body triglyceride levels (Ballard et al., 2010; Bjedov et al.,  
83 2010; Broughton et al., 2005; Choi et al., 2015; DiAngelo and Birnbaum, 2009; Francis

84 et al., 2010; Ghosh and O'Connor, 2014; Grönke et al., 2010; Heier and Kühnlein, 2018;  
85 Heier et al., 2021; Hentze et al., 2015; Kamareddine et al., 2018; Kang et al., 2017;  
86 Kubrak et al., 2020; Lee et al., 2019; Lehmann, 2018; Luong et al., 2006; Rajan and  
87 Perrimon, 2012; Roth et al., 2018; Scopelliti et al., 2019; Sieber and Spradling, 2015;  
88 Song et al., 2014, 2017; Suzawa et al., 2019; Teleman et al., 2005; Texada et al.,  
89 2019), the Adipokinetic hormone (Akh; FBgn0004552) pathway plays a central role in  
90 regulating whole-body fat storage and breakdown (Heier and Kühnlein, 2018; Heier et  
91 al., 2021; Lehmann, 2018). Akh is synthesized as a preprohormone in the Akh-  
92 producing cells (APCs), and is subsequently cleaved by proprotein convertases to  
93 produce active Akh (Lee and Park, 2004; Noyes et al., 1995; Predel et al., 2004;  
94 Wegener et al., 2006). When the APCs are activated by stimuli such as peptide  
95 hormones or neurons that make physical connections with the APCs (Kubrak et al.,  
96 2020; Oh et al., 2019; Scopelliti et al., 2019; Zhao and Karpac, 2017), Akh is released  
97 into the hemolymph. Circulating Akh interacts with a G-protein coupled receptor called  
98 the Akh receptor (AkhR, FBgn0025595), where Akh binding to AkhR on target tissues  
99 such as the fat body stimulates an intracellular signaling cascade that promotes fat  
100 breakdown (Braco et al., 2012; Gäde and Auerswald, 2003; Park et al., 2002; Patel et  
101 al., 2005; Staubli et al., 2002). While Akh-mediated triglyceride breakdown plays a vital  
102 role in releasing stored energy during times of nutrient scarcity to promote survival  
103 (Mochanová et al., 2018), the Akh pathway limits fat storage even in contexts when  
104 nutrients are plentiful. Indeed, loss of *Akh* or *AkhR* augments fat storage under normal  
105 physiological conditions (Bharucha et al., 2008; Gáliková et al., 2015; Grönke et al.,  
106 2007), highlighting the critical role of this pathway in regulating whole-body triglyceride  
107 levels.

108 Additional clues into potential mechanisms underlying the sex difference in fat  
109 storage come from studies on metabolic genes. For example, flies carrying loss-of-  
110 function mutations in genes involved in triglyceride synthesis and storage, such as  
111 *midway* (*mdy*; FBgn0004797), *Lipin* (*Lpin*; FBgn0263593), *Lipid storage droplet-2* (*Lsd-*  
112 *2*; FBgn0030608), and *Seipin* (*Seipin*; FBgn0040336) show reduced whole-body  
113 triglyceride levels (Buszczak et al., 2002; Grönke et al., 2003; Teixeira et al., 2003; Tian  
114 et al., 2011; Ugrankar et al., 2011; Wang et al., 2016). Whole-body deficiency for genes

115 that regulate triglyceride breakdown, on the other hand, generally have higher whole-  
116 body fat levels. This is best illustrated by elevated whole-body triglyceride levels found  
117 in flies lacking *brummer* (*bmm*; FBgn0036449) or *Hormone sensitive lipase* (*Hsl*;  
118 FBgn0034491), both of which encode lipases (Bi et al., 2012; Grönke et al., 2005).  
119 While these studies demonstrate the strength of *Drosophila* as a model in revealing  
120 conserved mechanisms that contribute to whole-body fat storage (Reczens et al.,  
121 2021; Schreiber et al., 2019; Walther and Farese, 2012), studies on *Drosophila* fat  
122 metabolism often use single- or mixed-sex groups of flies (Bednářová et al., 2018;  
123 Gálíková et al., 2015; Grönke et al., 2007; Hughson et al., 2021; Isabel et al., 2005; Lee  
124 and Park, 2004; Scopelliti et al., 2019). As a result, less is known about how these  
125 metabolic genes and pathways contribute to the sex difference in fat storage.

126         Recent studies have begun to fill this knowledge gap by studying fat metabolism  
127 in both sexes. In one study, higher circulating levels of steroid hormone ecdysone in  
128 mated females were found to promote increased whole-body fat storage (Sieber and  
129 Spradling, 2015). Another study showed that elevated levels of *bmm* mRNA in male  
130 flies restricted triglyceride storage to limit whole-body fat storage (Wat et al., 2020). Yet,  
131 neither ecdysone signaling nor *bmm* fully explain the male-female differences in whole-  
132 body fat metabolism (Sieber and Spradling, 2015; Wat et al., 2020), suggesting that  
133 additional metabolic genes and pathways must contribute to the sex difference in fat  
134 storage (Wat et al., 2020). Indeed, genome-wide association studies in *Drosophila*  
135 support sex-biased effects on fat storage for many genetic loci (Nelson et al., 2016;  
136 Watanabe and Riddle, 2021). As evidence of sex-specific mechanisms underlying  
137 whole-body fat storage continues to mount, several reports have also identified male-  
138 female differences in phenotypes linked with fat metabolism. For example, sex  
139 differences have been reported in energy physiology, metabolic rate, food intake, food  
140 preference, circadian rhythm, sleep, immune response, starvation resistance, and  
141 lifespan (Andretic and Shaw, 2005; Austad and Fischer, 2016; Belmonte et al., 2020;  
142 Chandegra et al., 2017; Helfrich-Förster, 2000; Huber et al., 2004; Hudry et al., 2019;  
143 Millington et al., 2021; Park et al., 2018; Reddiex et al., 2013; Regan et al., 2016; Sieber  
144 and Spradling, 2015; Videlier et al., 2019; Wat et al., 2020). More work is therefore  
145 needed to understand the genetic and physiological mechanisms underlying the male-

146 female difference in fat storage, and to identify the impact of this sex-specific regulation  
147 on key life history traits. Further, it will be critical to elucidate how these mechanisms  
148 are linked with upstream factors that determine sex.

149 In *Drosophila*, sexual development is determined by the number of X  
150 chromosomes (Salz and Erickson, 2010). In females, the presence of two X  
151 chromosomes triggers the production of a functional splicing factor called Sex lethal  
152 (Sxl; FBgn0264270) (Bell et al., 1988; Bridges, 1921; Cline, 1978). Sxl's most well-  
153 known downstream target is *transformer* (*tra*; FBgn0003741), where Sxl-dependent  
154 splicing of *tra* pre-mRNA allows the production of a functional Tra protein (Belote et al.,  
155 1989; Boggs et al., 1987; Inoue et al., 1990; Sosnowski et al., 1989). In males, which  
156 have only one X chromosome, no functional Sxl or Tra proteins are made (Cline and  
157 Meyer, 1996; Salz and Erickson, 2010). Over several decades, a large body of evidence  
158 has accumulated showing that Sxl and Tra direct most aspects of female sexual  
159 identity, including effects on abdominal pigmentation, egg-laying, neural circuits, and  
160 behaviour (Anand et al., 2001; Baker et al., 2001; Billeter et al., 2006; Brown and King,  
161 1961; Burtis and Baker, 1989; Camara et al., 2008; Christiansen et al., 2002; Cline,  
162 1978; Cline and Meyer, 1996; Clough et al., 2014; Dauwalder, 2011; Demir and  
163 Dickson, 2005; Goodwin et al., 2000; Hall, 1994; Heinrichs et al., 1998; Hoshijima et al.,  
164 1991; Inoue et al., 1992; Ito et al., 1996; Nagoshi et al., 1988; Neville et al., 2014;  
165 Nojima et al., 2014; Pavlou et al., 2016; von Philipsborn et al., 2014; Pomatto et al.,  
166 2017; Rezával et al., 2014, 2016; Rideout et al., 2007, 2010; Ryner et al., 1996;  
167 Sturtevant, 1945). More recently, studies have extended our knowledge of how Sxl and  
168 Tra regulate additional aspects of development and physiology such as body size and  
169 intestinal stem cell proliferation (Ahmed et al., 2020; Hudry et al., 2016; Millington and  
170 Rideout, 2018; Millington et al., 2021; Regan et al., 2016; Rideout et al., 2015; Sawala  
171 and Gould, 2017). Yet, the effects of sex determination genes on whole-body fat  
172 metabolism remain unknown, indicating a need for more knowledge of how factors that  
173 determine sexual identity influence this important aspect of physiology.

174 Here, we reveal a role for sex determination gene *tra* in regulating whole-body  
175 triglyceride storage. In females, Tra expression promotes a higher level of whole-body  
176 fat storage, whereas lack of a functional Tra protein in males leads to lower fat storage.

177 Interestingly, neurons were the anatomical focus of *tra*'s effects on fat storage, where  
178 we show that ectopic Tra expression in male APCs was sufficient to augment whole-  
179 body triglyceride levels. Our analysis of Akh pathway regulation in both sexes revealed  
180 increased *Akh/AkhR* mRNA levels, APC activity, and Akh pathway activity in males. Our  
181 findings indicate that this overall male bias in the Akh pathway contributes to the sex  
182 difference in whole-body triglyceride levels by restricting fat storage in males.  
183 Importantly, we show that the presence of Tra influences Akh pathway activity, and that  
184 Akh lies genetically downstream of Tra in regulating whole-body fat storage. These  
185 results provide new insight into the mechanisms by which upstream determinants of  
186 sexual identity, such as *tra*, influence the sex difference in fat storage. Further, we  
187 identify a previously unrecognized sex-biased role for Akh in regulating whole-body  
188 triglyceride levels.

189

## 190 **RESULTS**

191

### 192 **Sex determination gene *transformer* regulates the male-female difference in fat** 193 **storage**

194

195 Altered *Sxl* function in either sex causes significant lethality due to effects on the  
196 dosage compensation machinery (Cline, 1978; Cline and Meyer, 1996). We therefore  
197 asked whether the presence of Tra in females, which promotes female sexual  
198 development, contributes to the elevated whole-body triglyceride levels observed in  
199 females (Sieber and Spradling, 2015; Wat et al., 2020). In 5-day-old virgin females  
200 lacking *tra* function (*tra*<sup>1</sup>/*Df*(3*L*)*st-j7*), we found that whole-body triglyceride levels were  
201 significantly lower than in age-matched *w*<sup>1118</sup> control females (Figure 1A). Because we  
202 observed no significant difference in fat storage between *tra*<sup>1</sup>/*Df*(3*L*)*st-j7* mutant males  
203 and *w*<sup>1118</sup> controls (Figure 1 - figure supplement 1A), the sex difference in whole-body  
204 triglyceride storage was reduced. Importantly, Tra's effect on whole-body triglyceride  
205 storage was not explained by the absence of ovaries in females lacking Tra function  
206 (Sieber and Spradling, 2015; Wat et al., 2020), as whole-body fat storage was  
207 significantly reduced in *tra*<sup>1</sup>/*Df*(3*L*)*st-j7* mutant females without gonads compared with



208  $w^{1118}$  control females lacking ovaries (Figure 1B). Given that we reproduced this finding  
209 in females carrying a distinct combination of *tra* mutant alleles (Figure 1C) (Hudry et al.,  
210 2016), our findings suggest Tra regulates the sex difference in whole-body triglyceride  
211 levels by promoting fat storage in females. While females have reduced fat breakdown  
212 post-starvation compared with males (Wat et al., 2020), the magnitude of fat breakdown  
213 post-starvation was not significantly different between *tra*<sup>1</sup>/*Df(3L)st-j7* mutants and sex-  
214 matched  $w^{1118}$  controls (genotype:time interactions  $p=0.6298$  [females],  $p=0.3853$   
215 [males]; Supplementary file 1) (Figure 1 - figure supplement 1B). Tra function is  
216 therefore required to promote elevated fat storage in females, but does not regulate fat  
217 breakdown post-starvation.

218         Given that males normally lack a functional Tra protein (Belote et al., 1989;  
219 Boggs et al., 1987; Inoue et al., 1990; Sosnowski et al., 1989), we next asked whether  
220 the absence of Tra in males explains their reduced whole-body triglyceride levels and  
221 rapid triglyceride breakdown post-starvation (Wat et al., 2020). To test this, we  
222 ubiquitously overexpressed Tra using *daughterless* (*da*)-*GAL4*, an established way to  
223 feminize male flies (Ferveur et al., 1995; Rideout et al., 2015), and examined whole-  
224 body fat metabolism. In 5-day-old *da-GAL4>UAS-tra*<sup>F</sup> males, whole-body triglyceride  
225 levels were significantly higher than in age-matched *da-GAL4>+* or *+>UAS-tra*<sup>F</sup> control  
226 males (Figure 1D). No increase in whole-body fat storage was observed in age-matched  
227 *da-GAL4>UAS-tra*<sup>F</sup> females compared with *da-GAL4>+* or *+>UAS-tra*<sup>F</sup> control females  
228 (Figure 1 - figure supplement 1C); therefore, the sex difference in fat storage was  
229 reduced. Because high levels of Tra overexpression may influence viability (Siera and  
230 Cline, 2008), we also measured fat storage in males carrying an allele of *tra* that directs  
231 the production of physiological Tra levels (*tra*<sup>F K-IN</sup> allele) (Hudry et al., 2019). As in *da-*  
232 *GAL4>UAS-tra*<sup>F</sup> males, whole-body triglyceride levels were significantly higher in *tra*<sup>F K-</sup>  
233 *IN* males compared with  $w^{1118}$  control males (Figure 1E), indicating that the gain of a  
234 functional Tra protein in males promotes elevated whole-body fat storage.

235         Importantly, the presence of rudimentary ovaries in *tra*<sup>F K-IN</sup> males did not explain  
236 their increased fat storage, as whole-body fat storage was still higher in *tra*<sup>F K-IN</sup> males  
237 lacking gonads compared with gonadless control males (Figure 1F). The elevated fat  
238 storage in *tra*<sup>F K-IN</sup> males also cannot be attributed to ecdysone production by the

239 rudimentary ovaries, as no ecdysone target genes were upregulated (Figure 1 - figure  
240 supplement 1D) (Sieber and Spradling, 2015). Together, these data indicate that lack of  
241 Tra function contributes to the reduced whole-body triglyceride levels normally observed  
242 in males. In males, this role for Tra may also extend to regulation of fat breakdown, as  
243 triglyceride mobilization post-starvation was significantly reduced in *da-GAL4>UAS-tra<sup>F</sup>*  
244 males compared with *da-GAL4>+* or *+>UAS-tra<sup>F</sup>* controls during a 24 hr starvation  
245 period (genotype:time  $p < 0.0001$  [males]; Supplementary file 1) (Figure 1 - figure  
246 supplement 1E), a finding we reproduced in *tra<sup>F K-IN</sup>* males (Figure 1 - figure supplement  
247 1F). While this effect of Tra on fat breakdown in males does not perfectly align with our  
248 data from *tra* mutant females, we note a trend toward increased fat breakdown in *tra*  
249 mutant females that was not statistically significant (Figure 1 - figure supplement 1B).  
250 Taken together, these data support a clear role for Tra in regulating the sex difference in  
251 fat storage, and suggest that a role for Tra in regulating fat breakdown cannot be ruled  
252 out.

253

### 254 ***transformer* function in neurons regulates the sex difference in fat storage**

255

256 Tra function is required in many cell types, tissues, and organs to promote female  
257 sexual development (Anand et al., 2001; Baker et al., 2001; Billeter et al., 2006; Brown  
258 and King, 1961; Burtis and Baker, 1989; Camara et al., 2008; Christiansen et al., 2002;  
259 Clough et al., 2014; Dauwalder, 2011; Demir and Dickson, 2005; Goodwin et al., 2000;  
260 Hall, 1994; Heinrichs et al., 1998; Hoshijima et al., 1991; Inoue et al., 1992; Ito et al.,  
261 1996; Nagoshi et al., 1988; Neville et al., 2014; Nojima et al., 2014; Pavlou et al., 2016;  
262 von Philipsborn et al., 2014; Pomatto et al., 2017; Rezával et al., 2014, 2016; Rideout et  
263 al., 2007, 2010; Ryner et al., 1996; Sturtevant, 1945). To determine the cell types and  
264 tissues in which Tra function is required to influence fat metabolism, we overexpressed  
265 Tra using a panel of GAL4 lines that drive expression in subsets of cells and/or tissues.  
266 To rapidly assess potential effects on fat metabolism, we measured starvation  
267 resistance, an established readout for changes to fat storage and breakdown (Beller et  
268 al., 2010; Bi et al., 2012; Choi et al., 2015; Grönke et al., 2003, 2005, 2007; Gutierrez et  
269 al., 2007).

270 Normally, adult females have elevated starvation resistance compared with age-  
271 matched males due to higher fat storage and reduced fat breakdown (Wat et al., 2020).  
272 Indeed, loss of *tra* reduced starvation resistance in females (Figure 2A) whereas gain of  
273 Tra function enhanced starvation resistance in males (Figure 2B), in line with their  
274 effects on fat metabolism (Figure 1A,D). From our survey of different GAL4 lines (Figure  
275 2 - figure supplement 1A-F; Figure 2 - figure supplement 2A-D), we found that neurons  
276 were the cell type in which gain of Tra most strongly extended male starvation  
277 resistance (Figure 2C). Specifically, starvation resistance in males with Tra  
278 overexpression in neurons (*elav-GAL4>UAS-tra<sup>F</sup>*) was significantly extended compared  
279 with *elav-GAL4>+* and *+>UAS-tra<sup>F</sup>* controls (Figure 2C), with no effect in females  
280 (Figure 2 - figure supplement 3A). Because the increase in starvation resistance upon  
281 neuron-specific Tra expression was similar in magnitude to the increase in survival  
282 observed upon global Tra expression (Figure 2B,C), this finding suggests a key role for  
283 neuronal Tra in regulating starvation resistance.

284 To determine whether increased starvation resistance in *elav-GAL4>UAS-tra<sup>F</sup>*  
285 males was due to altered fat metabolism, we measured whole-body triglyceride levels in  
286 males and females with neuronal Tra overexpression. We found that *elav-GAL4>UAS-*  
287 *tra<sup>F</sup>* males (Figure 2D), but not females (Figure 2 - figure supplement 3B), showed a  
288 significant increase in whole-body fat storage compared with sex-matched *elav-GAL4>+*  
289 and *+>UAS-tra<sup>F</sup>* controls. This suggests that the male-specific increase in starvation  
290 resistance (Figure 2C) was due to increased fat storage in *elav-GAL4>UAS-tra<sup>F</sup>* males,  
291 which we confirm by showing that the rate of fat breakdown in *elav-GAL4>UAS-tra<sup>F</sup>*  
292 males and females was not significantly different from sex-matched *elav-GAL4>+* and  
293 *+>UAS-tra<sup>F</sup>* controls (Figure 2 - figure supplement 3C) (genotype:time interaction  
294  $p=0.2789$  [males],  $p=0.7058$  [females]; Supplementary file 1). Neurons are therefore  
295 one cell type in which Tra function influences the sex difference in whole-body  
296 triglyceride storage.

297 To identify specific neurons that mediate Tra's effects on starvation resistance  
298 and whole-body fat storage, we overexpressed Tra in neurons known to affect fat  
299 metabolism and measured starvation resistance (Figure 2 - figure supplement 4A-E)  
300 (Al-Anzi and Zinn, 2018; Al-Anzi et al., 2009; Chung et al., 2017; Li et al., 2016; May et

301 al., 2020; Min et al., 2016; Mosher et al., 2015; Zhan et al., 2016). One group of  
302 neurons that significantly augmented starvation resistance upon Tra expression was the  
303 APCs (Figure 2E), a group of neuroendocrine cells in the corpora cardiaca that produce  
304 Akh and other peptide hormones such as Limostatin (Lst; FBgn0034140) (Alfa et al.,  
305 2015; Lee and Park, 2004). Flies with APC-specific Tra expression (*Akh-GAL4>UAS-*  
306 *tra<sup>F</sup>*) had significantly increased starvation resistance compared with sex-matched *Akh-*  
307 *GAL4>+* and *+>UAS-tra<sup>F</sup>* controls (Figure 2E; Figure 2 - figure supplement 5A). To  
308 determine whether the starvation resistance phenotype indicated altered fat storage, we  
309 compared whole-body triglyceride levels in *Akh-GAL4>UAS-tra<sup>F</sup>* males and females  
310 with sex-matched *Akh-GAL4>+* and *+>UAS-tra<sup>F</sup>* controls. There was a significant  
311 increase in whole-body fat storage in males (Figure 2F) but not females (Figure 2 -  
312 figure supplement 5B) with APC-specific Tra expression. This indicates Tra function in  
313 the APCs promotes fat storage, revealing a previously unrecognized role for the APCs  
314 in regulating the sex difference in fat storage. Indeed, fat breakdown was unaffected in  
315 *Akh-GAL4>UAS-tra<sup>F</sup>* males and females compared with sex-matched *Akh-GAL4>+* and  
316 *+>UAS-tra<sup>F</sup>* controls (Figure 2 - figure supplement 5C) (genotype:time interaction  
317  $p=0.1201$  [males] and  $p=0.0596$  [females]; Supplementary file 1).

318

### 319 **Sex-specific regulation of Adipokinetic hormone leads to a male bias in pathway** 320 **activity**

321

322 Given that the sexual identity of the APCs impacts whole-body fat storage, we  
323 compared the regulation of *Akh*, APC activity, and Akh signaling between adult males  
324 and females. We first examined *Akh* and *AkhR* mRNA levels in both sexes using  
325 quantitative real-time polymerase chain reaction (qPCR). We found that mRNA levels of  
326 both *Akh* and *AkhR* were significantly higher in 5-day-old *w<sup>1118</sup>* males than in females  
327 (Figure 3A,B). This male bias in *Akh* mRNA levels did not reflect an increased APC  
328 number in males, as we found no sex difference in the number of APCs (Figure 3C).  
329 Because Akh release from the APCs is regulated by APC activity (Kubrak et al., 2020;  
330 Oh et al., 2019), we next measured APC activity in males and females by driving APC-  
331 specific expression of calcium-responsive chimeric transcription factor *LexA-VP16-*

332 *NFAT (Akh-GAL4>UAS-LexA-VP16-NFAT [called UAS-CaLexA])* (Masuyama et al.,  
333 2012). Sustained APC activity triggers nuclear import of LexA-VP16-NFAT, where it  
334 drives expression of a GFP reporter downstream of a LexA-responsive element  
335 (Masuyama et al., 2012). Monitoring GFP levels in the APCs therefore provides a  
336 straightforward way to monitor APC activity.

337 In 5-day-old *Akh-GAL4>UAS-CaLexA* males, GFP levels were significantly  
338 higher than in age- and genotype-matched females (Figure 3D-H). Because *GAL4*  
339 mRNA levels were not significantly different between males and females carrying the  
340 *Akh-GAL4* transgene (Figure 3 - figure supplement 1A), and the number of APCs did  
341 not differ between the sexes (Figure 3C), these findings indicate that the APCs are  
342 more active in males than in females. To determine whether the male bias in *Akh/AkhR*  
343 mRNA levels and APC activity affected Akh pathway activity, we next compared levels  
344 of an Akh pathway readout called phosphorylated Inositol-requiring enzyme 1 (Ire1;  
345 FBgn0261984) (p-Ire1) (Song et al., 2017) between 5-day-old male and female flies. We  
346 found that p-Ire1 levels were higher in *w<sup>1118</sup>* males compared with genotype-matched  
347 females in three out of four biological replicates (Figure 3I-K; Figure 3 - figure  
348 supplement 1B), a finding that aligns with the sex difference in *Akh/AkhR* mRNA levels  
349 and APC activity. Taken together, our data reveal a previously unrecognized male bias  
350 in Akh pathway activity.

351

## 352 **The Adipokinetic hormone pathway contributes to the sex difference in fat** 353 **storage**

354

355 As an initial step toward establishing whether the male bias in Akh pathway activity  
356 contributes to sex differences in fat metabolism, we used a published approach to  
357 ablate the APCs (*Akh-GAL4>UAS-reaper (rpr)*) (Lee and Park, 2004; White et al.,  
358 1996), and measured whole-body triglyceride levels in each sex. Because the sexual  
359 identity of the APCs affects fat storage and not fat breakdown (Figure 2F; Figure 2 -  
360 figure supplement 5C), we focused our analysis on measuring triglyceride storage  
361 rather than mobilization. Triglyceride levels were significantly higher in 5-day-old *Akh-*  
362 *GAL4>UAS-rpr* males than in *Akh-GAL4>+* and *+>UAS-rpr* control males (Figure 4A). In

363 contrast, triglyceride levels in 5-day-old *Akh-GAL4>UAS-rpr* females were not  
364 significantly different from *Akh-GAL4>+* and *+>UAS-rpr* control females (Figure 4 -  
365 figure supplement 1A). This suggests that the male bias in Akh pathway activity  
366 normally contributes to the sex difference in fat storage by limiting triglyceride  
367 accumulation in males. Importantly, we reproduced the male-biased effects on fat  
368 storage in flies carrying mutant *Akh* and *AkhR* alleles (*Akh<sup>A</sup>* and *AkhR<sup>1</sup>*, respectively)  
369 (Figure 4B,C; Figure 4 - figure supplement 1B,C), and show that APC-specific  
370 knockdown of *Lst* had no effect on fat storage in either sex (Figure 4 - figure supplement  
371 1D,E). These findings support a model in which it is Akh production by the APCs that  
372 plays a role in regulating the male-female difference in fat storage. While Akh is a  
373 known regulator of whole-body fat metabolism (Heier and Kühnlein, 2018; Heier et al.,  
374 2021), our findings reveal a new role for Akh in regulating the sex difference in fat  
375 storage. Notably, this Akh-mediated regulation of the male-female difference in fat  
376 storage operates in a parallel pathway to the previously described sex-specific role of  
377 triglyceride lipase *bmm* (Figure 4 - figure supplement 2A,B) (Wat et al., 2020).

378         Beyond the APC ablation or complete loss of Akh, we next wanted to test  
379 whether the sex-specific Akh regulation we uncovered contributes to the male-female  
380 difference in fat storage. To this end, we used a genetic approach to manipulate either  
381 *Akh* mRNA levels or APC activity. To determine whether the male bias in *Akh* mRNA  
382 levels contributes to the sex difference in fat storage, we measured whole-body  
383 triglyceride levels in flies with APC-specific expression of *Akh-RNAi* (*Akh-GAL4>UAS-*  
384 *Akh-RNAi*). Importantly, this manipulation effectively reduced *Akh* mRNA levels in both  
385 sexes (Figure 4 - figure supplement 3A,B). In males, whole-body triglyceride levels were  
386 significantly higher in *Akh-GAL4>UAS-Akh-RNAi* flies compared with *Akh-GAL4>+* and  
387 *+>UAS-Akh-RNAi* control flies (Figure 4D). *Akh-GAL4>UAS-Akh-RNAi* female flies, in  
388 contrast, showed no significant change in whole-body fat storage compared with *Akh-*  
389 *GAL4>+* and *+>UAS-Akh-RNAi* control females (Figure 4 - figure supplement 3C). This  
390 indicates a strongly male-biased effect on fat storage due to reduced *Akh* mRNA levels,  
391 suggesting that the sex difference in *Akh* mRNA levels contributes to the male-female  
392 difference in whole-body fat storage.



393 To determine whether the male bias in APC activity also influences the sex  
394 difference in fat storage, we silenced the APCs by APC-specific overexpression of an  
395 inwardly rectifying potassium channel Kir2.1 (Baines et al., 2001) and measured whole-  
396 body triglyceride levels. Whole-body fat storage in *Akh-GAL4>UAS-Kir2.1* adult males  
397 was significantly higher compared with *Akh-GAL4>+* and *+>UAS-Kir2.1* control males  
398 (Figure 4E). In females, while we observed significantly elevated whole-body fat storage  
399 in *Akh-GAL4>UAS-Kir2.1* adults compared with *Akh-GAL4>+* and *+>UAS-Kir2.1*  
400 controls (Figure 4 - figure supplement 3D), the magnitude of this increase was larger in  
401 males (sex:genotype interaction  $p=0.0455$ ; Supplementary file 1). Together, these data  
402 suggest that the male bias in APC activity contributes to the sex difference in fat storage  
403 by limiting triglyceride accumulation in males. Indeed, augmenting APC activity in  
404 females using a bacterial voltage-gated sodium channel (*UAS-NaChBac*) significantly  
405 reduced fat storage in females (Figure 4F; Figure 4 - figure supplement 3E). While Akh  
406 affects food-related behaviours in some contexts (Choi et al., 2015; Hentze et al., 2015;  
407 Huang et al., 2020), we observed no significant effects of altered APC activity on  
408 feeding behaviour in either sex (Figure 4 - figure supplement 4A-D). This suggests that  
409 the male-biased effect of APC manipulation on fat storage cannot be fully explained by  
410 effects on food intake. Thus, in addition to the contribution of elevated *Akh* mRNA levels  
411 in males to the sex difference in fat storage, we also identify a role for the male bias in  
412 APC activity in the sex-specific regulation of whole-body triglyceride levels.

413

#### 414 ***transformer* regulates the sex difference in fat storage via the Adipokinetic** 415 **hormone pathway**

416

417 Given that Tra function and the Akh pathway both contribute to the male-female  
418 difference in fat storage, we asked whether the presence of Tra affects the sex bias in  
419 Akh pathway activity. In 5-day-old *tra<sup>1</sup>/Df(3L)st-j7* females, levels of p-Ire1 were higher  
420 than in *w<sup>1118</sup>* control females in three out of four biological replicates (Figure 5A-C;  
421 Figure 5 - figure supplement 1A). This suggests the presence of Tra in females normally  
422 represses Akh pathway activity. Indeed, loss of Tra significantly increased *Akh* mRNA  
423 levels in females (Figure 5D). Given Tra's effects on Akh pathway activity, we next

424 tested whether the change in Akh pathway function was significant for Tra's effects on  
425 whole-body triglyceride levels. We predicted that if increased Akh pathway activity  
426 caused the lower fat storage in *tra* mutant females, genetic manipulations that reduce  
427 Akh pathway activity should block this reduction in whole-body triglyceride levels. While  
428 all female genotypes lacking *tra* function had reduced fat storage compared with control  
429 females (Figure 5E), APC ablation in *tra* mutant females rescued this decrease in  
430 whole-body triglyceride levels (Figure 5E). Indeed, fat storage in *tra* mutant females  
431 lacking APCs was not significantly different from *w<sup>1118</sup>* control females ( $p=0.9384$ ;  
432 Supplementary file 1) (Figure 5E), indicating that the increased Akh pathway activity we  
433 observed in *tra* mutant females was one reason for their reduced fat storage. Given that  
434 APC activation in males expressing physiological levels of Tra similarly rescued the Tra-  
435 induced increase in whole-body triglyceride levels (Figure 5F), these findings suggest  
436 that the sex-specific regulation of Akh pathway activity represents one way *tra*  
437 influences the male-female difference in fat storage.

438

439 **Loss of Adipokinetic hormone has opposite effects on reproductive success in**  
440 **each sex and mediates a fecundity-lifespan tradeoff in females**

441

442 Our results suggest that adult females show lower Akh pathway activity and higher fat  
443 storage, whereas males maintain a higher level of Akh activity and lower fat storage.  
444 Because the correct regulation of fat storage in each sex influences reproduction  
445 (Buszczak et al., 2002; Grönke et al., 2005; Sieber and Spradling, 2015; Wat et al.,  
446 2020), we tested how loss of this critical regulator of the sex difference in fat storage  
447 impacted offspring production in each sex. In *Akh<sup>A</sup>* mutant males, we found that the  
448 proportion of males copulating with a *Canton-S* (*CS*) virgin female was lower than in  
449 control *w<sup>1118</sup>* males at each 10 min interval during a 60 min observation period (Figure  
450 6A). When we counted viable offspring from these copulation events, we found that  
451 *Akh<sup>A</sup>* mutant males had significantly fewer overall progeny than *w<sup>1118</sup>* control males  
452 (Figure 6B). These results suggest that Akh function normally promotes reproductive  
453 success in males; however, it is important to note that Akh function is not absolutely



454 required for male fertility, as a prolonged 24 hr period of contact between *Akh<sup>A</sup>* mutant  
455 males and CS females allowed the production of normal progeny numbers (Figure 6C).

456 In contrast to males, loss of Akh in females increased fecundity (Figure 6D).  
457 Specifically, *Akh<sup>A</sup>* mutant females produced a significantly higher number of offspring  
458 compared with *w<sup>1118</sup>* controls (Figure 6D). Thus, in females, a low level of Akh pathway  
459 activity promotes fecundity. Given that a change in one life history trait such as  
460 reproduction often affects traits such as longevity (Chapman et al., 1995; Flatt, 2011;  
461 Fowler and Partridge, 1989; Hansen et al., 2013), we also measured lifespan in females  
462 with reduced Akh pathway function. We found that lifespan was significantly shorter in  
463 *Akh-GAL4>UAS-Kir2.1* females compared with *Akh-GAL4>+* and *+>UAS-Kir2.1* control  
464 females (Figure 6E). In contrast, male lifespan was not significantly different between  
465 *Akh-GAL4>UAS-Kir2.1* flies and *Akh-GAL4>+* and *+>UAS-Kir2.1* controls (Figure 6F).  
466 Our findings are in agreement with a previous study that demonstrated a female-specific  
467 reduction in lifespan in response to whole-body loss of *Akh* (Bednářová et al., 2018).  
468 This suggests that while low Akh activity in females promotes fertility, this benefit comes  
469 at the cost of a shorter lifespan.

470

## 471 **DISCUSSION**

472

473 In this study, we used the fruit fly *Drosophila melanogaster* to improve knowledge of the  
474 mechanisms underlying the male-female difference in whole-body triglyceride levels.  
475 We show that the presence of a functional Tra protein in females, which directs many  
476 aspects of female sexual development, promotes whole-body fat storage. Tra's ability to  
477 promote fat storage arises largely due to its function in neurons, where we identified the  
478 APCs as one neuronal population in which Tra function influences whole-body  
479 triglyceride levels. Our examination of *Akh/AkhR* mRNA levels and APC activity  
480 revealed several differences between the sexes, where these differences lead to higher  
481 Akh pathway activity in males than in females. Genetic manipulation of APCs and Akh  
482 pathway activity suggest a model in which the sex bias in Akh pathway activity  
483 contributes to the male-female difference in fat storage by limiting whole-body  
484 triglyceride storage in males. Importantly, we show that Tra function influences Akh

485 pathway activity, and that Akh acts genetically downstream of Tra in regulating whole-  
486 body triglyceride levels. This reveals a previously unrecognized genetic and  
487 physiological mechanism that contributes to the sex difference in fat storage.

488 One key finding from our study was the identification of sex determination gene  
489 *tra* as an upstream regulator of the male-female difference in fat storage. In females, a  
490 functional Tra protein promotes fat storage, whereas lack of Tra in males leads to  
491 reduced fat storage. While an extensive body of literature has demonstrated important  
492 roles for *tra* in regulating neural circuits, behaviour, abdominal pigmentation, and gonad  
493 development (Anand et al., 2001; Baker et al., 2001; Billeter et al., 2006; Brown and  
494 King, 1961; Burtis and Baker, 1989; Camara et al., 2008; Christiansen et al., 2002;  
495 Clough et al., 2014; Dauwalder, 2011; Demir and Dickson, 2005; Goodwin et al., 2000;  
496 Hall, 1994; Heinrichs et al., 1998; Hoshijima et al., 1991; Inoue et al., 1992; Ito et al.,  
497 1996; Nagoshi et al., 1988; Neville et al., 2014; Nojima et al., 2014; Pavlou et al., 2016;  
498 von Philipsborn et al., 2014; Pomatto et al., 2017; Rezával et al., 2014, 2016; Rideout et  
499 al., 2007, 2010; Ryner et al., 1996; Sturtevant, 1945), uncovering a role for *tra* in  
500 regulating fat storage significantly extends our understanding of how sex differences in  
501 metabolism arise. Given that sex differences exist in other aspects of metabolism (e.g.  
502 oxygen consumption) (Wat et al., 2020), this new insight suggests that more work will  
503 be needed to determine whether *tra* contributes to sexual dimorphism in additional  
504 metabolic traits. Indeed, one study showed that *tra* influences the sex difference in  
505 adaptation to hydrogen peroxide stress (Pomatto et al., 2017). Beyond metabolism, Tra  
506 also regulates multiple aspects of development and physiology such as intestinal stem  
507 cell proliferation (Ahmed et al., 2020; Hudry et al., 2016; Millington and Rideout, 2018),  
508 carbohydrate metabolism (Hudry et al., 2019), body size (Mathews et al., 2017; Rideout  
509 et al., 2015), phenotypic plasticity (Millington et al., 2021), and lifespan responses to  
510 dietary restriction (Regan et al., 2016). Because some, but not all, of these studies  
511 identify a cell type in which Tra function influences these diverse phenotypes, future  
512 studies will need to determine which cell types and tissues require Tra expression to  
513 establish a female metabolic and physiological state. Indeed, recent single-cell analyses  
514 reveal widespread gene expression differences in shared cell types between the sexes  
515 (Li et al., 2021).

516 Identifying neurons as the anatomical focus of Tra's effects on fat storage was  
517 another key finding from our study. While many sexually dimorphic neural circuits  
518 related to behaviour and reproduction have been identified (Anand et al., 2001; Auer  
519 and Benton, 2016; Baker et al., 2001; Billeter et al., 2006; Clyne and Miesenböck, 2008;  
520 Dauwalder, 2011; Demir and Dickson, 2005; Evans and Cline, 2007; Goodwin et al.,  
521 2000; Hall, 1994; Inoue et al., 1992; Ito et al., 1996; Kimura et al., 2019; Kvitsiani and  
522 Dickson, 2006; Neville et al., 2014; Nojima et al., 2014; Pavlou et al., 2016; von  
523 Philipsborn et al., 2014; Rezával et al., 2014, 2016; Rideout et al., 2007, 2010; Ryner et  
524 al., 1996; Sato et al., 2019; Shirangi et al., 2016; Wang et al., 2020), less is known  
525 about sex differences in neurons that regulate physiology and metabolism. Indeed,  
526 while many studies have identified neurons that regulate fat metabolism (Al-Anzi and  
527 Zinn, 2018; Al-Anzi et al., 2009; Chung et al., 2017; Li et al., 2016; May et al., 2020; Min  
528 et al., 2016; Mosher et al., 2015; Zhan et al., 2016), these studies were conducted in  
529 single- or mixed-sex populations. Because male-female differences in neuron number  
530 (Billeter et al., 2006; Castellanos et al., 2013; Demir and Dickson, 2005; Garner et al.,  
531 2018; Lee and Hall, 2001; Rideout et al., 2007, 2010; Robinett et al., 2010; Taylor and  
532 Truman, 1992), morphology (Cachero et al., 2010; Kimura et al., 2019), activity (Guo et  
533 al., 2016), and connectivity (Cachero et al., 2010; Nojima et al., 2021) have all been  
534 described across the brain and ventral nerve cord (Mellert et al., 2010, 2016), a detailed  
535 analysis of neuronal populations that influence metabolism will be needed in both sexes  
536 to understand how neurons contribute to the sex-specific regulation of metabolism and  
537 physiology. Indeed, while our identification of a role for APC sexual identity in regulating  
538 the male-female difference in fat storage represents a significant step forward in  
539 understanding how sex differences in neurons influence metabolic traits, more  
540 knowledge is needed of sexual dimorphism in this critical neuronal subset.

541 An obvious starting point for learning more about the sex-specific regulation of fat  
542 storage by the APCs is to examine how sexual identity influences known APC  
543 regulatory mechanisms. For example, there are physical connections between  
544 corazonin- and neuropeptide F-positive (CN) neurons and APCs in adult male flies (Oh  
545 et al., 2019), and between the APCs and a bursicon- $\alpha$ -responsive subset of DLgr2  
546 neurons in females (Scopelliti et al., 2019). These connections inhibit APC activity: CN

547 neurons inhibit APC activity in response to high hemolymph sugar levels (Oh et al.,  
548 2019), whereas binding of bursicon- $\alpha$  to DLgr2 neurons inhibits APC activity in nutrient-  
549 rich conditions (Scopelliti et al., 2019). Future studies will therefore need to determine  
550 whether these physical connections exist in both sexes. Male-female differences in  
551 circulating factors that regulate the APCs may also exist. For example, gut-derived  
552 Allatostatin C (AstC; FBgn0032336) binds its receptor on the APCs to trigger Akh  
553 release; however, loss of AstC affects fat metabolism and starvation resistance in  
554 females but not in males (Kubrak et al., 2020). This suggests that sex differences in  
555 AstC production or release may exist. Another circulating factor that may influence the  
556 sex difference in fat storage is skeletal muscle-derived unpaired 2 (upd2;  
557 FBgn0030904), which regulates hemolymph Akh levels to maintain diurnal fat  
558 metabolism (Zhao and Karpac, 2017). Given that circulating peptides such as  
559 Allatostatin A (AstA; FBgn0015591), *Drosophila* insulin-like peptides (Dilps), and activin  
560 ligands also influence Akh pathway activity (Ahmad et al., 2020; Hentze et al., 2015;  
561 Post et al., 2019; Song et al., 2017), a systematic survey of circulating factors that  
562 modulate Akh production, release, and Akh pathway activity in each sex will be needed  
563 to fully understand the sex-specific regulation of fat storage.

564 In addition to fat metabolism, it will be important to extend our understanding of  
565 how sex-specific Akh regulation affects additional Akh-regulated phenotypes. For  
566 example, Akh has been linked with the regulation of lifespan (Bednářová et al., 2018;  
567 Liao et al., 2021), starvation resistance (Isabel et al., 2005; Kubrak et al., 2020;  
568 Mochanová et al., 2018), locomotion (Isabel et al., 2005; Lee and Park, 2004), immune  
569 responses (Adamo et al., 2008), cardiac function (Isabel et al., 2005; Noyes et al.,  
570 1995), oxidative stress responses (Gáliková et al., 2015), and fertility (Liao et al., 2021).  
571 Yet, most studies were performed in mixed- or single-sex populations. This suggests  
572 additional work is needed to determine how changes to Akh pathway function affect  
573 physiology, development, and life history in both sexes. Importantly, the lessons we  
574 learn may also extend to other species. Akh signalling is highly conserved across  
575 invertebrates (Gäde and Auerswald, 2003; Lorenz and Gäde, 2009; Staubli et al.,  
576 2002), and is functionally similar to the mammalian  $\beta$ -adrenergic and glucagon systems  
577 (Grönke et al., 2007; Lee and Park, 2004; Staubli et al., 2002). Because sex-specific

578 regulation of both glucagon and the  $\beta$ -adrenergic systems have been described in  
579 mammalian models and in humans (Al-Gburi et al., 2017; Bell et al., 2001; Bilginoglu et  
580 al., 2007; Brooks et al., 2015; Claustre et al., 1980; Dart et al., 2002; Davis et al., 2000;  
581 Drake et al., 1998; Freedman et al., 1987; Hinojosa-Laborde et al., 1999; Hoeker et al.,  
582 2014; Hogarth et al., 2007; Lafontan et al., 1997; Luzier et al., 1998; McIntosh et al.,  
583 2011; Ng et al., 1993), detailed studies on sex-specific Akh regulation and function in  
584 flies may provide vital clues into the mechanisms underlying male-female differences in  
585 physiology and metabolism in other animals.

586

## 587 **MATERIALS AND METHODS**

588

589 **Data availability.** Details of all statistical tests and  $p$ -values are in Supplementary file 1.  
590 All raw data generated in this study are in Supplementary file 2. All primer sequences  
591 are in Supplementary file 3. Original image files for all images in this study are available  
592 upon request.

593

594 **Fly husbandry.** Fly stocks were maintained at 25°C in a 12:12 light:dark cycle. All  
595 larvae were reared at a density of 50 larvae per 10 ml of fly media (recipe in  
596 Supplementary file 4). Males and females were separated either as early pupae by  
597 gonad size, or late pupae by the presence of sex combs. Sex-transformed males and  
598 females were distinguished by the presence (males) or absence (females) of B<sup>S</sup>Y.  
599 Single-sex groups of 20 pupae were transferred to damp filter paper within a food vial  
600 until eclosion. Unless otherwise stated, all experiments used 5- to 7-day-old flies.

601

602 **Fly strains.** We obtained the following strains from the Bloomington *Drosophila* Stock  
603 Center: *Canton-S* (#64349), *w<sup>1118</sup>* (#3605), *UAS-nGFP* (#4775), *UAS-Akh-RNAi*  
604 (#27031), *UAS-tra<sup>F</sup>* (#4590), *tra<sup>1</sup>* (#675), *Df(3L)st-j7* (#5416), *UAS-NaChBac* (#9468),  
605 *UAS-Kir2.1* (#6595), *UAS-reaper* (#5823), *UAS-CaLexA* (#66542). We obtained *Akh<sup>A</sup>*,  
606 *AkhR<sup>rev</sup>*, *AkhR<sup>1</sup>*, *bmm<sup>1</sup>*, and *AkhR<sup>1</sup>;bmm<sup>1</sup>* as kind gifts from Dr. Ronald Kühnlein  
607 (Gáliková et al., 2015; Grönke et al., 2005, 2007), *tra<sup>KO</sup>* and *tra<sup>F K-IN</sup>* as kind gifts from  
608 Dr. Irene Miguel-Aliaga (Hudry et al., 2016, 2019), and *Mex-GAL4* as a kind gift from Dr.

609 Claire Thomas (Phillips and Thomas, 2006). The following GAL4 lines were used for  
610 tissue-specific expression: *da-GAL4* (ubiquitous), *cg-GAL4* (fat body), *r4-GAL4* (fat  
611 body), *Lsp2-GAL4* (fat body), *Myo1A-GAL4* (enterocytes), *Mex-GAL4* (enterocytes),  
612 *dMef2-GAL4* (skeletal muscle), *repo-GAL4* (glia), *elav-GAL4* (neurons), *c587-GAL4*  
613 (somatic cells of the gonad), *tj-GAL4* (somatic cells of the gonad), *nos-GAL4* (germ cells  
614 of the gonad), *dimmed-GAL4* (peptidergic neurons), *TH-GAL4* (dopaminergic neurons),  
615 *Tdc2-GAL4* (octopaminergic neurons), *VT030559-GAL4* (mushroom body neurons),  
616 *dilp2-GAL4* (insulin-producing cells), *Akh-GAL4* (Akh-producing cells). All transgenic  
617 stocks were backcrossed into a *w<sup>1118</sup>* background for a minimum of 5 generations.

618

619 **Adult weight.** To measure adult weight, groups of ten flies were weighed in 1.5 ml  
620 microcentrifuge tubes on an analytical balance (Mettler-Toledo, ME104).

621

622 **RNA extraction, cDNA synthesis, and qPCR.** One biological replicate consisted of  
623 five flies homogenized in 200  $\mu$ l of Trizol. RNA was extracted following manufacturer's  
624 instructions, as previously described (Wat et al., 2020). cDNA was synthesized from  
625 RNA using the Quantitect Reverse Transcription Kit (Qiagen, 205311). qPCR was used  
626 to quantify relative mRNA transcript levels as previously described (Wat et al., 2020).  
627 See Supplementary file 3 for a full list of primers.

628

629 **Whole-body triglyceride measurements.** One biological replicate consisted of five  
630 flies homogenized in 200  $\mu$ l of 0.1% Tween (AMresco, 0777-1L) in 1X PBS using 50  $\mu$ l  
631 of glass beads (Sigma, 11079110) agitated at 8 m/s for 5 seconds (OMNI International  
632 Bead Ruptor 24). Assay was performed according to established protocols (Tennessen  
633 et al., 2014) as previously described (Wat et al., 2020).

634

635 **Western blotting.** One biological replicate consisted of ten flies homogenized in  
636 extraction buffer (females=200  $\mu$ l, males=125  $\mu$ l) containing 20 mM Hepes (pH 7.8), 450  
637 mM NaCl, 25% glycerol, 50 mM NaF, 0.2 mM EDTA, 0.5% Triton X-100, 1 mM PMSF, 1  
638 mM DTT, 1X cComplete Protease Inhibitor Cocktail (Roche), and 1X PhosSTOP (Roche)  
639 using 50  $\mu$ l of glass beads (Sigma, 11079110) agitated at 8 m/s for 5 seconds (OMNI



640 International Bead Ruptor 24). Samples were incubated on ice for 5 min before cellular  
641 debris was pelleted by centrifugation at 10,000 rpm for 5 min at 4°C and supernatant  
642 was removed (Thermo Scientific, Heraeus Pico 21 centrifuge). Centrifugation was  
643 repeated twice more to remove fat from the samples. Protein concentration of each  
644 sample was determined by a Bradford Assay (Bio-Rad, 550-0205); 20 µg of protein per  
645 sample was loaded onto a 12% SDS-PAGE gel. Immunoblotting was performed as  
646 previously described (Millington et al., 2021). Primary antibodies used were rabbit anti-  
647 p-Ire1 (1:1000; Abcam #48187) and mouse anti-actin (1:100; Santa Cruz #sc-8432).  
648 Secondary antibodies used were goat anti-rabbit (1:5000; Invitrogen #65-6120) and  
649 horse anti-mouse (1:2000; Cell Signaling #7076).

650

651 **APC measurements.** To isolate the APCs, individual flies were anesthetized on ice,  
652 and the brain and foregut were removed in cold 1X PBS. Samples were fixed in 4%  
653 paraformaldehyde for 30 min, followed by two 30 min washes in cold 1X PBS. Samples  
654 were incubated with Hoechst (Sigma, 33342) at a concentration of 1:500 for 5 min and  
655 mounted in SlowFade Diamond Antifade Mountant (ThermoFisher, S36967). Images  
656 were captured using a Leica TCS SP5 Confocal Microscope and processed using Fiji  
657 (ImageJ; Schindelin et al., 2012). To visualize APC neuronal activity (*Akh-GAL4>UAS-*  
658 *CaLexA*), the mean GFP intensity of one APC cluster was quantified by measuring  
659 average pixel intensity within the region of interest using Fiji (ImageJ; Schindelin et al.,  
660 2012). To determine APC cell number (*Akh-GAL4>UAS-nGFP*), GFP punctae were  
661 counted manually using Fiji (ImageJ; Schindelin et al., 2012). One biological replicate  
662 consists of one cluster of APCs, where only one APC cluster was measured per  
663 individual.

664

665 **Capillary Feeder Assay.** One biological replicate consisted of ten flies placed into a  
666 specialized 15 ml conical vial with access to 2 capillary tubes. Capillary tubes were filled  
667 with fly food media containing 5% sucrose, 5% yeast extract, 0.3% propionic acid, and  
668 0.15% nipagin. Approximately 0.5 µl of mineral oil was added to the top of each capillary  
669 tube to prevent evaporation. All vials were placed into fitted holes in the lid of a large  
670 plastic container. A shallow layer of water was poured into the base of the container to

671 maintain high humidity throughout the experiment. The meniscus of the fly food media  
672 was marked before the start of the experiment and again after 24 hr. The distance  
673 between the marks is used to quantify the volume of fly food media that was consumed  
674 (1 mm=0.15  $\mu$ l). The volume of fly food consumed was normalized to the weight of  
675 individual flies (protocol adapted from Stafford et al., 2012).

676

677 **Male fertility.** One singly-housed male was placed with a group of three virgin *Canton-*  
678 *S* (CS) females and allowed to interact for 60 min. At 10 min intervals during the 60 min  
679 observation period, we recorded whether a copulating male-female pair was present in  
680 the vial. After the 60 min observation period, the male was removed from the vial and  
681 the females were allowed to lay eggs for 72 hr (flies were transferred to new food every  
682 24 hr). After 72 hr, the females were removed and progeny were allowed to develop.  
683 After 10 days, we counted the number of pupae in each vial. For the 24 hr mating  
684 assay, one singly-housed male was allowed to interact with three virgin CS females for  
685 24 hr before the male was removed and females were allowed to lay eggs for 72 hr as  
686 described above.

687

688 **Female fecundity.** One virgin female was placed with a group of three virgin CS males  
689 for 24 hr. The females were then transferred onto fresh food every 24 hr for 3 days and  
690 the number of pupae were counted as described above.

691

692 **Starvation resistance.** 5-day-old flies were transferred to vials containing 2 ml of  
693 starvation media (0.7% agar in 1X PBS). The number of deaths was recorded every 12  
694 hr until no living flies remained in the vial.

695

696 **Lifespan.** Flies were transferred to new vials with 2 ml of fresh food every 2-3 days until  
697 no living flies remained in the vial. Deaths were recorded when the flies were  
698 transferred.

699

700 **Statistics and data presentation.** All figures and data were generated and analyzed  
701 using GraphPad Prism (v9.1.2). For experiments with 2 groups, a Student's *t*-test was



702 performed. For experiments with 3 or more groups, a one-way ANOVA with Tukey HSD  
703 post-hoc test was performed. For fat breakdown experiments, a two-way ANOVA was  
704 used to determine the interaction between genotype and time. Starvation resistance and  
705 lifespan statistics were performed using RStudio and a script for a Log-rank test with  
706 Bonferroni's correction for multiple comparisons. Note, the lowest  $p$ -value given by  
707 RStudio is  $2.0 \times 10^{-16}$ . The below packages and script were used:

```
708  
709 library ("survminer")  
710 library ("survival")  
711 data <- read.csv("xxx.csv")  
712 survfit(Surv(time, event) ~ genotype, data)  
713 pairwise_survdiff(Surv(time, event) ~ genotype, data, p.adjust.method = "bonferroni")  
714 summary (data)
```

715

## 716 **ACKNOWLEDGEMENTS**

717

718 We would like to thank Dr. Ronald Kühnlein for *Akh<sup>A</sup>*, *AkhR<sup>rev</sup>*, *AkhR<sup>1</sup>*, *bmm<sup>1</sup>*, and  
719 *AkhR<sup>1</sup>;bmm<sup>1</sup>* fly strains. We would also like to thank Dr. Irene Miguel-Aliaga for the *tra<sup>KO</sup>*  
720 and *tra<sup>F K-IN</sup>* strains, and Dr. Claire Thomas for *Mex-GAL4*. Stocks obtained from the  
721 Bloomington *Drosophila* Stock Center (NIH P40OD018537) were used in this study. We  
722 thank the TRiP at Harvard Medical School (NIH/NIGMS R01-GM084947) for providing  
723 transgenic RNAi fly stocks and/or plasmid vectors used in this study. We acknowledge  
724 critical resources and information provided by FlyBase (Thurmond et al., 2019); FlyBase  
725 is supported by a grant from the National Human Genome Research Institute at the  
726 U.S. National Institutes of Health ([U41 HG000739](#)) and by the British Medical Research  
727 Council ([MR/N030117/1](#)). Funding for this study was provided by grants to EJР from the  
728 Canadian Institutes for Health Research (CIHR, PJТ-153072), CIHR Sex and Gender  
729 Science Chair Program (GS4-171365), Natural Sciences and Engineering Research  
730 Council of Canada (NSERC, RGPIN-2016-04249), Michael Smith Foundation for Health

731 Research (16876), and the Canadian Foundation for Innovation (JELF-34879). LWW  
732 was supported by a British Columbia Graduate Scholarship Award and a 1-year CELL  
733 Fellowship from UBC. JWM and PB were each supported by a 4-year CELL Fellowship  
734 from UBC. We acknowledge that our research takes place on the traditional, ancestral,  
735 and unceded territory of the Musqueam people; a privilege for which we are grateful.

736

## 737 **COMPETING INTERESTS STATEMENT**

738 No competing interests declared.

739

## 740 **MAIN FIGURE LEGENDS**

741

742 **Figure 1. *transformer* regulates the sex difference in fat storage.** (A) Whole-body  
743 triglyceride levels were significantly lower in *tra<sup>1</sup>/Df(3L)st-j7* females compared with  
744 *w<sup>1118</sup>* controls ( $p < 0.0001$ ; Student's *t*-test).  $n = 8$  biological replicates. (B) Whole-body  
745 triglyceride levels were significantly lower in *tra<sup>1</sup>/Df(3L)st-j7* females with excised  
746 gonads compared with *w<sup>1118</sup>* controls lacking gonads ( $p < 0.0001$ ; Student's *t*-test).  $n = 8$   
747 biological replicates. (C) Whole-body triglyceride levels were significantly lower in *tra<sup>KO</sup>*  
748 females compared with *w<sup>1118</sup>* controls ( $p = 0.0037$ ; Student's *t*-test).  $n = 8$  biological  
749 replicates. (D) Whole-body triglyceride levels were significantly higher in *da-*  
750 *GAL4>UAS-tra<sup>F</sup>* males compared with *da-GAL4>+* and *+>UAS-tra<sup>F</sup>* controls ( $p < 0.0001$   
751 and  $p < 0.0001$  respectively; one-way ANOVA followed by Tukey's HSD).  $n = 8$  biological  
752 replicates. (E) Whole-body triglyceride levels were significantly higher in *tra<sup>F K-IN</sup>* males  
753 compared with *w<sup>1118</sup>* controls ( $p < 0.0001$ , Student's *t*-test).  $n = 8$  biological replicates. (F)  
754 Whole-body triglyceride levels were significantly higher in *tra<sup>F K-IN</sup>* males with excised  
755 gonads compared with *w<sup>1118</sup>* controls lacking gonads ( $p < 0.0001$ ; Student's *t*-test).  $n = 8$   
756 biological replicates. Black circles indicate the presence of a transgene and open circles  
757 indicate the lack of a transgene. \*\* indicates  $p < 0.01$ , \*\*\*\* indicates  $p < 0.0001$ ; error bars  
758 represent SEM.

## 759 **Figure 2. *transformer* function in Akh-producing cells contributes to the sex**

760 **difference in fat storage.** (A) Starvation resistance was significantly reduced in  
761 *tra<sup>1</sup>/Df(3L)st-j7* females compared with *w<sup>1118</sup>* controls ( $p < 2 \times 10^{-16}$ ; log-rank test,

762 Bonferroni's correction for multiple comparisons).  $n=344-502$  animals. (B) Starvation  
763 resistance was significantly enhanced in *da-GAL4>UAS-tra<sup>F</sup>* males compared with *da-*  
764 *GAL4>+* and *+>UAS-tra<sup>F</sup>* controls ( $p<2\times 10^{-16}$  and  $p<2\times 10^{-16}$  respectively; log-rank test,  
765 Bonferroni's correction for multiple comparisons).  $n=198-201$  animals. (C) Starvation  
766 resistance was significantly enhanced in *elav-GAL4>UAS-tra<sup>F</sup>* males compared with  
767 *elav-GAL4>+* and *+>UAS-tra<sup>F</sup>* controls ( $p<2\times 10^{-16}$  and  $p<2\times 10^{-16}$  respectively; log-rank  
768 test, Bonferroni's correction for multiple comparisons).  $n=248-279$  animals. (D) Whole-  
769 body triglyceride levels were significantly higher in *elav-GAL4>UAS-tra<sup>F</sup>* males  
770 compared with *elav-GAL4>+* and *+>UAS-tra<sup>F</sup>* controls ( $p=0.0001$  and  $p=0.0006$   
771 respectively; one-way ANOVA followed by Tukey's HSD).  $n=7-8$  biological replicates.  
772 (E) Starvation resistance was significantly enhanced in *Akh-GAL4>UAS-tra<sup>F</sup>* males  
773 compared with *Akh-GAL4>+* and *+>UAS-tra<sup>F</sup>* controls ( $p=3.1\times 10^{-9}$  and  $p<2\times 10^{-16}$   
774 respectively; log-rank test, Bonferroni's correction for multiple comparisons).  $n=280-364$   
775 animals. (F) Whole-body triglyceride levels were significantly higher in *Akh-GAL4>UAS-*  
776 *tra<sup>F</sup>* males compared to *Akh-GAL4>+* and *+>UAS-tra<sup>F</sup>* control males ( $p<0.0001$  and  
777  $p<0.0001$  respectively; one-way ANOVA followed by Tukey's HSD).  $n=8$  biological  
778 replicates. Black circles indicate the presence of a transgene and open circles indicate  
779 the lack of a transgene. \*\*\* indicates  $p<0.001$ , \*\*\*\* indicates  $p<0.0001$ ; shaded areas  
780 represent the 95% confidence interval; error bars represent SEM.

781 **Figure 3. Sex-specific regulation of Akh and the Akh signaling pathway.** (A) *Akh*  
782 mRNA levels were significantly higher in  $w^{1118}$  males compared with genotype-matched  
783 females ( $p<0.0001$ , Student's *t*-test).  $n=8$  biological replicates. (B) *AkhR* mRNA levels  
784 were significantly higher in  $w^{1118}$  males than in females ( $p=0.0002$ , Student's *t*-test).  $n=4$   
785 biological replicates. (C) Expression of *UAS-nGFP* in Akh-producing cells (APCs) (*Akh-*  
786 *GAL4>UAS-nGFP*) revealed no significant difference in APC cell number between  
787 males and females ( $p=0.5166$ ; Student's *t*-test).  $n=22-23$  animals. (D) GFP intensity  
788 produced as a readout of calcium activity in the APCs (*Akh-GAL4>LexAop-CD8-*  
789 *GFP;UAS-LexA-VP16-NFAT (UAS-CaLexA)*) was significantly higher in males  
790 compared with females ( $p=0.0176$ ; Student's *t*-test).  $n=11$  biological replicates. (E-H)  
791 Maximum Z-projections of images showing GFP produced as a readout for APC  
792 calcium activity from both *Akh-GAL4>UAS-CaLexA* males and females. Yellow outline

793 represents APC location, scale bars=50  $\mu\text{m}$ ,  $n=11$  biological replicates. (I-K) Whole-  
794 body p-Ire1 levels were higher in  $w^{1118}$  males compared with  $w^{1118}$  females in three  
795 biological replicates. \* indicates  $p<0.05$ , \*\*\* indicates  $p<0.001$ , \*\*\*\* indicates  $p<0.0001$ ,  
796 ns indicates not significant; error bars represent SEM.

797 **Figure 4. Sex-specific regulation of Akh and APC activity influence the sex**  
798 **difference in fat storage.** (A) Whole-body triglyceride levels were significantly higher in  
799 *Akh-GAL4>UAS-reaper (rpr)* males compared with *Akh-GAL4>+* and *+>UAS-rpr*  
800 controls ( $p=0.0002$  and  $p=0.0215$  respectively; one-way ANOVA followed by Tukey's  
801 HSD).  $n=8$  biological replicates. (B) Whole-body triglyceride levels were significantly  
802 higher in *Akh<sup>A</sup>* males compared with  $w^{1118}$  controls ( $p<0.0001$ ; one-way ANOVA  
803 followed by Tukey's HSD).  $n=8$  biological replicates. (C) Whole-body triglyceride levels  
804 were significantly higher in *AkhR<sup>1</sup>* males compared with *AkhR<sup>rev</sup>* controls ( $p<0.0001$ ;  
805 one-way ANOVA followed by Tukey's HSD).  $n=8$  biological replicates. (D) Whole-body  
806 triglyceride levels were significantly higher in *Akh-GAL4>UAS-Akh-RNAi* males  
807 compared with *Akh-GAL4>+* and *+>UAS-Akh-RNAi* controls ( $p=0.0015$  and  $p=0.0002$   
808 respectively; one-way ANOVA followed by Tukey's HSD).  $n=8$  biological replicates. (E)  
809 Whole-body triglyceride levels were significantly higher in *Akh-GAL4>UAS-Kir2.1* males  
810 compared with *Akh-GAL4>+* and *+>UAS-Kir2.1* controls ( $p<0.0001$  and  $p<0.0001$   
811 respectively; one-way ANOVA followed by Tukey's HSD).  $n=8$  biological replicates. (F)  
812 Whole-body triglyceride levels were significantly lower in *Akh-GAL4>UAS-NaChBac*  
813 females compared with *Akh-GAL4>+* and *+>UAS-NaChBac* controls ( $p<0.0001$  and  
814  $p<0.0001$  respectively; one-way ANOVA followed by Tukey's HSD).  $n=8$  biological  
815 replicates. Black circles indicate the presence of a transgene and open circles indicate  
816 the lack of a transgene; \* indicates  $p<0.05$ , \*\* indicates  $p<0.01$ , \*\*\* indicates  $p<0.001$ ,  
817 \*\*\*\* indicates  $p<0.0001$ ; error bars represent SEM.

818 **Figure 5. transformer regulates the sex difference in fat storage via the Akh**  
819 **signalling pathway.** (A-C) Whole-body p-Ire1 levels were higher in *tra<sup>1</sup>/Df(3L)st-j7*  
820 females compared with  $w^{1118}$  controls in three biological replicates. (D) Whole-body *Akh*  
821 mRNA levels were significantly higher in *tra<sup>1</sup>/Df(3L)st-j7* females compared with  $w^{1118}$   
822 controls ( $p<0.0001$ ; Student's *t*-test).  $n=8$  biological replicates. (E) Whole-body

823 triglyceride levels were significantly lower in *tra<sup>KO</sup>/Df(3L)st-j7* females carrying either  
824 *Akh-GAL4>+* or *+>UAS-reaper (rpr)* transgenes compared with *w<sup>1118</sup>* controls carrying a  
825 functional Tra protein ( $p<0.0001$  and  $p<0.0001$  respectively; one-way ANOVA followed  
826 by Tukey's HSD). Whole-body triglyceride levels were not significantly different between  
827 *tra<sup>KO</sup>/Df(3L)st-j7* females lacking APCs (*Akh-GAL4>UAS-rpr*) and *w<sup>1118</sup>* controls  
828 ( $p=0.9384$ ; one-way ANOVA followed by Tukey's HSD).  $n=8$  biological replicates. (F)  
829 Whole-body triglyceride levels were significantly higher in *tra<sup>F<sup>K-IN</sup></sup>* males carrying either  
830 *Akh-GAL4>+* or *+>UAS-NaChBac* transgenes compared with *w<sup>1118</sup>* control males  
831 lacking Tra function ( $p<0.0001$  and  $p<0.0001$  respectively; one-way ANOVA followed by  
832 Tukey's HSD). Whole-body triglyceride levels in *tra<sup>F<sup>K-IN</sup></sup>* males with APC activation (*Akh-*  
833 *GAL4>UAS-NaChBac*) were significantly lower than *tra<sup>F<sup>K-IN</sup></sup>* males carrying either the  
834 *Akh-GAL4>+* or *+>UAS-NaChBac* transgenes alone ( $p<0.0001$  and  $p<0.0001$   
835 respectively; one-way ANOVA followed by Tukey's HSD).  $n=5$  biological replicates.  
836 Black circles indicate the presence of a transgene or mutant allele and open circles  
837 indicate the lack of a transgene or mutant allele. \*\*\*\* indicates  $p<0.0001$ , ns indicates  
838 not significant; error bars represent SEM.

839 **Figure 6. Sex-specific regulation of Akh signalling pathway promotes**

840 **reproductive success in each sex.** (A) At all observation points, a lower proportion of  
841 *Akh<sup>A</sup>* males were successfully copulating with a wildtype *Canton-S (CS)* female  
842 compared with *w<sup>1118</sup>* controls.  $n=31$  males. (B) The number of pupae produced from a  
843 60 min mating period was significantly lower in *Akh<sup>A</sup>* males compared with *w<sup>1118</sup>* controls  
844 ( $p=0.0003$ ; Student's *t*-test).  $n=24-26$  males. (C) The number of pupae produced from a  
845 24 hr mating period was not significantly different between *Akh<sup>A</sup>* males and *w<sup>1118</sup>* control  
846 males ( $p=0.2501$ ; Student's *t*-test).  $n=24-25$  males. (D) The number of pupae produced  
847 from a 24 hr mating period was significantly higher in *Akh<sup>A</sup>* females compared with *w<sup>1118</sup>*  
848 controls ( $p=0.0006$ ; Student's *t*-test).  $n=28-36$  females. (E) Lifespan was significantly  
849 shorter in *Akh-GAL4>UAS-Kir2.1* females compared with *Akh-GAL4>+* and *+>UAS-*  
850 *Kir2.1* controls ( $p<2\times 10^{-16}$  and  $p=0.0015$  respectively; log-rank test, Bonferroni's  
851 correction for multiple comparisons).  $n=160-198$  females. (F) Lifespan of *Akh-*  
852 *GAL4>UAS-Kir2.1* males was intermediate between *Akh-GAL4>+* and *+>UAS-Kir2.1*  
853 controls, indicating no overall effect of inhibiting APC neuronal activity on male lifespan



854 ( $p=0.00013$  and  $p=7.0 \times 10^{-6}$  respectively; log-rank test, Bonferroni's correction for  
855 multiple comparisons).  $n=196-200$  males. \*\* indicates  $p<0.01$ , \*\*\* indicates  $p<0.001$ , \*\*\*\*  
856 indicates  $p<0.0001$ , ns indicates not significant; error bars represent SEM; shaded  
857 areas represent the 95% confidence interval.

858

## 859 SUPPLEMENTAL FIGURE LEGENDS

860

### 861 **Figure 1 - figure supplement 1. Elucidating *transformer*'s effect on sex differences**

862 **in fat metabolism.** (A) Whole-body triglyceride levels were not significantly different  
863 between *tra<sup>1</sup>/Df(3L)st-j7* males and *w<sup>1118</sup>* controls ( $p=0.0685$ ; Student's *t*-test).  $n=8$   
864 biological replicates. (B) The reduction in whole-body triglyceride levels post-starvation  
865 was not significantly different between *tra<sup>1</sup>/Df(3L)st-j7* animals and sex-matched *w<sup>1118</sup>*  
866 controls between 0-24 hr post-starvation (genotype:time  $p=0.6298$  [female],  $p=0.3853$   
867 [male]; two-way ANOVA per sex).  $n=7-8$  biological replicates. (C) Whole-body  
868 triglyceride levels in *da-GAL4>UAS-tra<sup>F</sup>* females were intermediate between *da-*  
869 *GAL4>+* and *+>UAS-tra<sup>F</sup>* control females, indicating no overall effect of Tra  
870 overexpression in females ( $p=0.0160$  and  $p=0.0002$  respectively; one-way ANOVA  
871 followed by Tukey's HSD).  $n=7-8$  biological replicates. (D) Whole-body mRNA levels of  
872 ecdysone responsive genes were not higher in *tra<sup>F K-IN</sup>* males compared to *w<sup>1118</sup>* control  
873 males (*Ecdysone receptor (EcR)*:  $p<0.0001$ ; *Ecdysone-induced protein 75B (E75)*:  
874  $p=0.0072$ ; *Ecdysone-induced protein 78C (E78)*:  $p=0.0408$ ; *broad (br)*:  $p=0.0003$ ; *ftz*  
875 *transcription factor 1 (ftz-f1)*:  $p=0.002$ ; Student's *t*-test for each gene).  $n=7-8$  biological  
876 replicates. (E) The reduction in whole-body triglyceride levels between 0-24 hr post-  
877 starvation was significantly smaller in *da-GAL4>UAS-tra<sup>F</sup>* males compared with *da-*  
878 *GAL4>+* and *+>UAS-tra<sup>F</sup>* control males (genotype:time  $p<0.0001$ ; two-way ANOVA).  
879 The post-starvation reduction in triglyceride levels in *da-GAL4>UAS-tra<sup>F</sup>* females was  
880 intermediate between both *da-GAL4>+* and *+>UAS-tra<sup>F</sup>* controls, suggesting no overall  
881 effect of Tra overexpression on female fat storage (genotype:time  $p=0.0223$ ; two-way  
882 ANOVA per sex).  $n=7-8$  biological replicates. (F) The reduction in whole-body  
883 triglyceride levels between 0-24 hr post-starvation was significantly lower in *tra<sup>F K-IN</sup>*  
884 males, but not females, compared with sex-matched *w<sup>1118</sup>* controls (genotype:time

885  $p=0.0009$  [male],  $p=0.9024$  [female]; two-way ANOVA per sex).  $n=7-8$  biological  
886 replicates. F indicates female, M indicates male. Black circles indicate the presence of a  
887 transgene and open circles indicate the lack of a transgene. \* indicates  $p<0.05$ , \*\*  
888 indicates  $p<0.01$ , \*\*\* indicates  $p<0.001$ , \*\*\*\* indicates  $p<0.0001$ , ns indicates not  
889 significant; error bars represent SEM except for graphs displaying fat breakdown where  
890 error bars represent COE.

891

892 **Figure 2 - figure supplement 1. Effect of *transformer* gain in multiple cell types  
893 and tissues on starvation resistance.** (A-F) Limited to no effects of Tra

894 overexpression on starvation resistance were observed for female fat body, muscle, and  
895 gut (for individual  $p$ -values see Supplementary file 1; log-rank test with Bonferroni's  
896 correction for multiple comparisons). In males, Tra overexpression in the fat body and  
897 gut caused no extension of starvation resistance, with only a minor extension observed  
898 upon Tra overexpression in muscle (for individual  $p$ -values see Supplementary file 1;  
899 log-rank test with Bonferroni's correction for multiple comparisons). (A)  $n=397-413$   
900 females,  $n=295-431$  males. (B)  $n=187-206$  females,  $n=198-202$  males. (C)  $n=293-402$   
901 females,  $n=330-452$  males. (D)  $n=268-383$  females,  $n=363-409$  males. (E)  $n=226-374$   
902 females,  $n=250-362$  males. (F)  $n=168-206$  females,  $n=178-198$  males. \*\* indicates  
903  $p<0.01$ , \*\*\* indicates  $p<0.001$ , \*\*\*\* indicates  $p<0.0001$ , ns indicates not significant;  
904 shaded areas represent the 95% confidence interval.

905 **Figure 2 - figure supplement 2. Effect of *transformer* gain in additional cell types  
906 and tissues on starvation resistance.** (A-D) Limited to no effects of Tra

907 overexpression were observed upon Tra expression in the female gonad and glia (for  
908 individual  $p$ -values see Supplementary file 1; log-rank test with Bonferroni's correction  
909 for multiple comparisons). Limited to no effects of Tra overexpression were observed  
910 upon Tra expression in the male gonad and glia (for individual  $p$ -values see  
911 Supplementary file 1; log-rank test with Bonferroni's correction for multiple  
912 comparisons). (A)  $n=232-268$  females,  $n=318-400$  males. (B)  $n=234-349$  females,  
913  $n=327-349$  males. (C)  $n=374-442$  females,  $n=293-364$  males. (D)  $n=300-374$  females,  
914  $n=329-355$  males. \* indicates  $p<0.05$ , \*\* indicates  $p<0.01$ , \*\*\* indicates  $p<0.001$ , \*\*\*\*

915 indicates  $p < 0.0001$ , ns indicates not significant; shaded areas represent the 95%  
916 confidence interval.

917 **Figure 2 - figure supplement 3. Gain of *transformer* function in neurons does not**  
918 **affect fat breakdown.** (A) Starvation resistance in *elav-GAL4>UAS-tra<sup>F</sup>* females was  
919 not significantly different compared with *elav-GAL4>+* and *+>UAS-tra<sup>F</sup>* controls ( $p=0.3$   
920 and  $p=1$ , respectively; log-rank test with Bonferroni's correction for multiple  
921 comparisons).  $n=318-749$  females. (B) Whole-body triglyceride levels were not  
922 significantly different between *elav-GAL4>UAS-tra<sup>F</sup>* females and *elav-GAL4>+* and  
923 *+>UAS-tra<sup>F</sup>* controls ( $p=0.3224$  and  $p=0.7754$  respectively; one-way ANOVA followed  
924 by Tukey's HSD).  $n=8$  biological replicates. (C) The reduction in whole-body triglyceride  
925 levels post-starvation was not significantly different between *elav-GAL4>UAS-tra<sup>F</sup>* flies  
926 and sex-matched *elav-GAL4>+* and *+>UAS-tra<sup>F</sup>* controls (genotype:time  $p=0.2789$   
927 [male],  $p=0.7058$  [female]; two-way ANOVA per sex).  $n=7-8$  biological replicates. Black  
928 circles indicate the presence of a transgene and open circles indicate the lack of a  
929 transgene; ns indicates not significant; shaded areas represent the 95% confidence  
930 interval; error bars represent SEM except for graphs displaying fat breakdown where  
931 error bars represent COE.

932 **Figure 2 - figure supplement 4. Effect of *transformer* gain in multiple neuronal**  
933 **subsets on starvation resistance.** (A-E) Limited to no effects of Tra overexpression in  
934 several subsets of neurons on starvation resistance in females (for individual  $p$ -values  
935 see Supplementary file 1; log-rank test with Bonferroni's correction for multiple  
936 comparisons). In males, Tra overexpression in several subsets of neurons caused no  
937 extension of starvation resistance (for individual  $p$ -values see Supplementary file 1; log-  
938 rank test with Bonferroni's correction for multiple comparisons). (A)  $n=248-333$  females,  
939  $n=249-333$  males. (B)  $n=322-484$  females,  $n=314-516$  males. (C)  $n=282-478$  females,  
940  $n=364-516$  males. (D)  $n=256-343$  females,  $n=326-392$  males. (E)  $n=326-390$  females,  
941  $n=285-466$  males. \* indicates  $p < 0.05$ , \*\*\*\* indicates  $p < 0.0001$ , ns indicates not  
942 significant; shaded areas represent the 95% confidence interval.

943 **Figure 2 - figure supplement 5. Gain of *transformer* function in Akh-producing**  
944 **cells does not affect fat breakdown.** (A) Starvation resistance was significantly



945 extended in *Akh-GAL4>UAS-tra<sup>F</sup>* females compared with *Akh-GAL4>+* and *+>UAS-tra<sup>F</sup>*  
946 controls ( $p=0.00033$  and  $p=9.4\times 10^{-11}$  respectively; log-rank test with Bonferroni's  
947 correction for multiple comparisons).  $n=168-219$  females. (B) Whole-body triglyceride  
948 levels were not significantly different between *Akh-GAL4>UAS-tra<sup>F</sup>* females and *Akh-*  
949 *GAL4>+* and *+>UAS-tra<sup>F</sup>* controls ( $p=0.2195$  and  $p=0.0731$  respectively; one-way  
950 ANOVA followed by Tukey's HSD).  $n=8$  biological replicates. (C) The reduction in  
951 whole-body triglyceride levels post-starvation was not significantly different between  
952 *Akh-GAL4>UAS-tra<sup>F</sup>* animals and sex-matched *Akh-GAL4>+* and *+>UAS-tra<sup>F</sup>* controls  
953 (genotype:time  $p=0.1201$  [males],  $p=0.0596$  [female]; two-way ANOVA per sex).  $n=8$   
954 biological replicates. Black circles indicate the presence of a transgene and open circles  
955 indicate the lack of a transgene; \*\*\* indicates  $p<0.001$ , \*\*\*\* indicates  $p<0.0001$ , ns  
956 indicates not significant; shaded areas represent the 95% confidence interval; error bars  
957 represent SEM except for graphs displaying fat breakdown where error bars represent  
958 COE.

959 **Figure 3 - figure supplement 1. *Akh-GAL4* drives equivalent *GAL4* mRNA levels in**  
960 **both sexes.** (A) Whole-body *GAL4* mRNA levels were not significantly different  
961 between *Akh-GAL4>+* females and males ( $p=0.0687$ ; Student's *t*-test).  $n=8$  biological  
962 replicates. (B) Whole-body p-Ire1 levels were not higher in *w<sup>1118</sup>* males compared with  
963 *w<sup>1118</sup>* females in one biological replicate. ns indicates not significant; error bars  
964 represent SEM.

965 **Figure 4 - figure supplement 1. APC-derived Limostatin does not regulate the sex**  
966 **difference in fat storage.** (A) Whole-body triglyceride levels were not significantly  
967 different between *Akh-GAL4>UAS-reaper (rpr)* females and *Akh-GAL4>+* and *+>UAS-*  
968 *rpr* controls ( $p=0.3024$  and  $p=0.4673$  respectively; one-way ANOVA followed by Tukey's  
969 HSD).  $n=8$  biological replicates. (B) Whole-body triglyceride levels were significantly  
970 higher in *Akh<sup>A</sup>* females compared with *w<sup>1118</sup>* controls ( $p=0.0152$ ; one-way ANOVA  
971 followed by Tukey's HSD).  $n=8$  biological replicates. (C) Whole-body triglyceride levels  
972 were significantly higher in *AkhR<sup>1</sup>* females compared with *AkhR<sup>rev</sup>* control females  
973 ( $p<0.0001$ ; one-way ANOVA followed by Tukey's HSD).  $n=8$  biological replicates. (D)  
974 Whole-body triglyceride levels in *Akh-GAL4>UAS-Limostatin (Lst)-RNAi* males were not

975 significantly different from both *Akh-GAL4>+* and *+>UAS-Lst-RNAi* controls ( $p=0.0357$   
976 and  $p=0.2364$  respectively; one-way ANOVA followed by Tukey's HSD).  $n=8$  biological  
977 replicates. (E) Whole-body triglyceride levels in *Akh-GAL4>UAS-Lst-RNAi* females were  
978 not significantly different from both *Akh-GAL4>+* and *+>UAS-Lst-RNAi* controls  
979 ( $p<0.0001$  and  $p=0.6656$  respectively; one-way ANOVA followed by Tukey's HSD).  $n=8$   
980 biological replicates. Black circles indicate the presence of a transgene and open circles  
981 indicate the lack of a transgene. \* indicates  $p<0.05$ , \*\*\*\* indicates  $p<0.0001$ , ns  
982 indicates not significant; error bars represent SEM.

983 **Figure 4 - figure supplement 2. Akh and *brummer* operate in parallel pathways to**  
984 **regulate the sex difference in fat storage.** (A) Whole-body triglyceride levels were  
985 significantly higher in *AkhR<sup>1</sup>* and *bmm<sup>1</sup>* males, respectively, compared with *w<sup>1118</sup>*  
986 controls ( $p<0.0001$  and  $p<0.0001$ ; one-way ANOVA followed by Tukey's HSD). Whole-  
987 body triglyceride levels were further increased in *AkhR<sup>1</sup>*; *bmm<sup>1</sup>* males compared with  
988 *AkhR<sup>1</sup>* males and *bmm<sup>1</sup>* males ( $p<0.0001$  and  $p<0.0001$  respectively; one-way ANOVA  
989 followed by Tukey's HSD).  $n=7-8$  biological replicates. (B) Whole-body triglyceride  
990 levels were significantly higher in *AkhR<sup>1</sup>* females compared with *w<sup>1118</sup>* controls; however  
991 whole-body triglyceride levels were not significantly different between *bmm<sup>1</sup>* females  
992 and *w<sup>1118</sup>* control females ( $p=0.002$  and  $p=0.4256$  respectively; one-way ANOVA  
993 followed by Tukey's HSD). Whole-body triglyceride levels were further increased in  
994 *AkhR<sup>1</sup>*; *bmm<sup>1</sup>* females compared to *AkhR<sup>1</sup>* females and *bmm<sup>1</sup>* females ( $p=0.0024$  and  
995  $p<0.0001$  respectively; one-way ANOVA followed by Tukey's HSD).  $n=8$  biological  
996 replicates. Black circles indicate the presence of a mutant allele and open circles  
997 indicate the lack of a mutant allele. \*\* indicates  $p<0.01$ , \*\*\*\* indicates  $p<0.0001$ , ns  
998 indicates not significant; error bars represent SEM.

999 **Figure 4 - figure supplement 3. RNAi-mediated Akh knockdown effectively**  
1000 **reduced Akh transcripts in both sexes.** (A) *Akh* mRNA levels in the head and anterior  
1001 half of the thorax were significantly lower in *Akh-GAL4>UAS-Akh-RNAi* males compared  
1002 with *Akh-GAL4>+* controls ( $p=0.0008$ ; Student's *t*-test).  $n=5-8$  biological replicates. (B)  
1003 *Akh* mRNA levels in the head and anterior half of the thorax were significantly lower in  
1004 *Akh-GAL4>UAS-Akh-RNAi* females compared with *Akh-GAL4>+* controls ( $p<0.0001$ ;

1005 Student's *t*-test). *n*=8 biological replicates. (C) Whole-body triglyceride levels were not  
1006 significantly different between *Akh-GAL4>UAS-Akh-RNAi* females and both *Akh-*  
1007 *GAL4>+* and *+>UAS-Akh-RNAi* controls (*p*=0.0136 and *p*=0.4845 respectively; one-way  
1008 ANOVA followed by Tukey's HSD). *n*=8 biological replicates. (D) Whole-body  
1009 triglyceride levels were significantly higher in *Akh-GAL4>UAS-Kir2.1* females compared  
1010 with *Akh-GAL4>+* and *+>UAS-Kir2.1* controls (*p*=0.0001 and *p*=0.0022 respectively;  
1011 one-way ANOVA followed by Tukey's HSD). *n*=8 biological replicates. (E) Whole-body  
1012 triglyceride levels were significantly lower in *Akh-GAL4>UAS-NaChBac* males  
1013 compared with *Akh-GAL4>+* and *+>UAS-NaChBac* controls (*p*<0.0001 and *p*<0.0001  
1014 respectively; one-way ANOVA followed by Tukey's HSD). *n*=8 biological replicates.  
1015 Black circles indicate the presence of a transgene and open circles indicate the lack of a  
1016 transgene. \*\* indicates *p*<0.01, \*\*\* indicates *p*<0.001, \*\*\*\* indicates *p*<0.0001, ns  
1017 indicates not significant; error bars represent SEM.

1018 **Figure 4 - figure supplement 4. Activity of the Akh-producing cells does not**  
1019 **regulate food consumption in either sex.** (A) Food consumption was not significantly  
1020 different between *Akh-GAL4>UAS-Kir2.1* females and *Akh-GAL4>+* and *+>UAS-Kir2.1*  
1021 controls (*p*=0.6488 and *p*=0.0539 respectively; one-way ANOVA followed by Tukey's  
1022 HSD). *n*=8 biological replicates. (B) Food consumption was not significantly different  
1023 between *Akh-GAL4>UAS-Kir2.1* males and *Akh-GAL4>+* and *+>UAS-Kir2.1* controls  
1024 (*p*=0.3623 and *p*=0.0638 respectively; one-way ANOVA followed by Tukey's HSD). *n*=7-  
1025 8 biological replicates. (C) Food consumption was not significantly different between  
1026 *Akh-GAL4>UAS-NaChBac* females and *Akh-GAL4>+* and *+>UAS-NaChBac* controls  
1027 (*p*=0.9369 and *p*=0.9571 respectively; one-way ANOVA followed by Tukey's HSD). *n*=7-  
1028 8 biological replicates. (D) Food consumption was not significantly different between  
1029 *Akh-GAL4>UAS-NaChBac* males and both *Akh-GAL4>+* and *+>UAS-NaChBac*  
1030 controls (*p*=0.0266 and *p*=0.8141 respectively; one-way ANOVA followed by Tukey's  
1031 HSD). *n*=8 biological replicates. Black circles indicate the presence of a transgene and  
1032 open circles indicate the lack of a transgene. ns indicates not significant; error bars  
1033 represent SEM.

1034 **Figure 5 - figure supplement 1. Whole-body p-Ire1 levels in *transformer* mutant**  
1035 **flies.** (A) Whole-body p-Ire1 levels were not higher in *tra<sup>1</sup>/Df(3L)st-j7* females compared  
1036 with *w<sup>1118</sup>* control females in one biological replicate. Black circles indicate the presence  
1037 of a mutant allele and open circles indicate the lack of a mutant allele.

1038

## 1039 REFERENCES

- 1040
- 1041 Adamo, S.A., Roberts, J.L., Easy, R.H., and Ross, N.W. (2008). Competition between immune function and  
1042 lipid transport for the protein apolipoprotein III leads to stress-induced immunosuppression in crickets. *J.*  
1043 *Exp. Biol.* *211*, 531–538.
- 1044 Ahmad, M., He, L., and Perrimon, N. (2020). Regulation of insulin and adipokinetic hormone/glucagon  
1045 production in flies. *Wiley Interdiscip. Rev. Dev. Biol.* *9*, e360.
- 1046 Ahmed, S.M.H., Maldera, J.A., Kronic, D., Paiva-Silva, G.O., Pénalva, C., Teleman, A.A., and Edgar, B.A.  
1047 (2020). Fitness trade-offs incurred by ovary-to-gut steroid signaling in *Drosophila*. *Nature* *584*, 415–419.
- 1048 Al-Anzi, B., and Zinn, K. (2018). Identification and characterization of mushroom body neurons that  
1049 regulate fat storage in *Drosophila*. *Neural Develop.* *13*, 18.
- 1050 Al-Anzi, B., Sapin, V., Waters, C., Zinn, K., Wyman, R.J., and Benzer, S. (2009). Obesity-blocking neurons  
1051 in *Drosophila*. *Neuron* *63*, 329–341.
- 1052 Alfa, R.W., Park, S., Skelly, K.-R., Poffenberger, G., Jain, N., Gu, X., Kockel, L., Wang, J., Liu, Y., Powers,  
1053 A.C., et al. (2015). Suppression of insulin production and secretion by a dectetin hormone. *Cell Metab.*  
1054 *21*, 323–334.
- 1055 Al-Gburi, S., Deussen, A., Zatschler, B., Weber, S., Künzel, S., El-Armouche, A., Lorenz, K., Cybularz, M.,  
1056 Morawietz, H., and Kopalani, I. (2017). Sex-difference in expression and function of beta-adrenoceptors  
1057 in macrovessels: role of the endothelium. *Basic Res. Cardiol.* *112*, 29.
- 1058 Anand, A., Villella, A., Ryner, L.C., Carlo, T., Goodwin, S.F., Song, H.J., Gailey, D.A., Morales, A., Hall, J.C.,  
1059 Baker, B.S., et al. (2001). Molecular genetic dissection of the sex-specific and vital functions of the  
1060 *Drosophila melanogaster* sex determination gene *fruitless*. *Genetics* *158*, 1569–1595.
- 1061 Andretic, R., and Shaw, P.J. (2005). Essentials of Sleep Recordings in *Drosophila*: Moving Beyond Sleep  
1062 Time. In *Methods in Enzymology*, M.W. Young, ed. (Academic Press), pp. 759–772.
- 1063 Auer, T.O., and Benton, R. (2016). Sexual circuitry in *Drosophila*. *Curr. Opin. Neurobiol.* *38*, 18–26.
- 1064 Austad, S.N., and Fischer, K.E. (2016). Sex Differences in Lifespan. *Cell Metab.* *23*, 1022–1033.
- 1065 Baines, R.A., Uhler, J.P., Thompson, A., Sweeney, S.T., and Bate, M. (2001). Altered Electrical Properties  
1066 in *Drosophila* Neurons Developing without Synaptic Transmission. *J. Neurosci.* *21*, 1523–1531.
- 1067 Baker, B.S., Taylor, B.J., and Hall, J.C. (2001). Are complex behaviors specified by dedicated regulatory  
1068 genes? Reasoning from *Drosophila*. *Cell* *105*, 13–24.
- 1069 Ballard, S.L., Jarolimova, J., and Wharton, K.A. (2010). Gbb/BMP signaling is required to maintain energy  
1070 homeostasis in *Drosophila*. *Dev. Biol.* *337*, 375–385.
- 1071 Bednářová, A., Tomčala, A., Mochanová, M., Kodrík, D., and Krishnan, N. (2018). Disruption of  
1072 Adipokinetic Hormone Mediated Energy Homeostasis Has Subtle Effects on Physiology, Behavior and  
1073 Lipid Status During Aging in *Drosophila*. *Front. Physiol.* *9*.

- 1074 Bell, C., Seals, D.R., Monroe, M.B., Day, D.S., Shapiro, L.F., Johnson, D.G., and Jones, P.P. (2001). Tonic  
1075 sympathetic support of metabolic rate is attenuated with age, sedentary lifestyle, and female sex in  
1076 healthy adults. *J. Clin. Endocrinol. Metab.* *86*, 4440–4444.
- 1077 Bell, L.R., Maine, E.M., Schedl, P., and Cline, T.W. (1988). *Sex-lethal*, a *Drosophila* sex determination  
1078 switch gene, exhibits sex-specific RNA splicing and sequence similarity to RNA binding proteins. *Cell* *55*,  
1079 1037–1046.
- 1080 Beller, M., Bulankina, A.V., Hsiao, H.-H., Urlaub, H., Jäckle, H., and Kühnlein, R.P. (2010). PERILIPIN-  
1081 dependent control of lipid droplet structure and fat storage in *Drosophila*. *Cell Metab.* *12*, 521–532.
- 1082 Belmonte, R.L., Corbally, M.-K., Duneau, D.F., and Regan, J.C. (2020). Sexual Dimorphisms in Innate  
1083 Immunity and Responses to Infection in *Drosophila melanogaster*. *Front. Immunol.* *10*, 3075.
- 1084 Belote, J.M., McKeown, M., Boggs, R.T., Ohkawa, R., and Sosnowski, B.A. (1989). Molecular genetics of  
1085 transformer, a genetic switch controlling sexual differentiation in *Drosophila*. *Dev. Genet.* *10*, 143–154.
- 1086 Bharucha, K.N., Tarr, P., and Zipursky, S.L. (2008). A glucagon-like endocrine pathway in *Drosophila*  
1087 modulates both lipid and carbohydrate homeostasis. *J. Exp. Biol.* *211*, 3103–3110.
- 1088 Bi, J., Xiang, Y., Chen, H., Liu, Z., Grönke, S., Kühnlein, R.P., and Huang, X. (2012). Opposite and  
1089 redundant roles of the two *Drosophila* perilipins in lipid mobilization. *J. Cell Sci.* *125*, 3568–3577.
- 1090 Bilginoglu, A., Amber Cicek, F., Ugur, M., Gurdal, H., and Turan, B. (2007). The role of gender differences  
1091 in beta-adrenergic receptor responsiveness of diabetic rat heart. *Mol. Cell. Biochem.* *305*, 63–69.
- 1092 Billeter, J.-C., Rideout, E.J., Dornan, A.J., and Goodwin, S.F. (2006). Control of male sexual behavior in  
1093 *Drosophila* by the sex determination pathway. *Curr. Biol. CB* *16*, R766–776.
- 1094 Bjedov, I., Toivonen, J.M., Kerr, F., Slack, C., Jacobson, J., Foley, A., and Partridge, L. (2010). Mechanisms  
1095 of life span extension by rapamycin in the fruit fly *Drosophila melanogaster*. *Cell Metab.* *11*, 35–46.
- 1096 Boggs, R.T., Gregor, P., Idriss, S., Belote, J.M., and McKeown, M. (1987). Regulation of sexual  
1097 differentiation in *D. melanogaster* via alternative splicing of RNA from the transformer gene. *Cell* *50*,  
1098 739–747.
- 1099 Braco, J.T., Gillespie, E.L., Alberto, G.E., Brenman, J.E., and Johnson, E.C. (2012). Energy-dependent  
1100 modulation of glucagon-like signaling in *Drosophila* via the AMP-activated protein kinase. *Genetics* *192*,  
1101 457–466.
- 1102 Bridges, C.B. (1921). TRIPLOID INTERSEXES IN *DROSOPHILA MELANOGASTER*. *Science* *54*, 252–254.
- 1103 Brooks, V.L., Shi, Z., Holwerda, S.W., and Fadel, P.J. (2015). Obesity-induced increases in sympathetic  
1104 nerve activity: sex matters. *Auton. Neurosci. Basic Clin.* *187*, 18–26.
- 1105 Broughton, S.J., Piper, M.D.W., Ikeya, T., Bass, T.M., Jacobson, J., Drieger, Y., Martinez, P., Hafen, E.,  
1106 Withers, D.J., Leivers, S.J., et al. (2005). Longer lifespan, altered metabolism, and stress resistance in  
1107 *Drosophila* from ablation of cells making insulin-like ligands. *Proc. Natl. Acad. Sci. U. S. A.* *102*, 3105–  
1108 3110.



- 1109 Brown, E.H., and King, R.C. (1961). Studies on the Expression of the *Transformer* Gene of *Drosophila*  
1110 *Melanogaster*. *Genetics* 46, 143–156.
- 1111 Burtis, K.C., and Baker, B.S. (1989). *Drosophila doublesex* gene controls somatic sexual differentiation by  
1112 producing alternatively spliced mRNAs encoding related sex-specific polypeptides. *Cell* 56, 997–1010.
- 1113 Buszczak, M., Lu, X., Segraves, W.A., Chang, T.Y., and Cooley, L. (2002). Mutations in the *midway* gene  
1114 disrupt a *Drosophila* acyl coenzyme A: diacylglycerol acyltransferase. *Genetics* 160, 1511–1518.
- 1115 Cachero, S., Ostrovsky, A.D., Yu, J.Y., Dickson, B.J., and Jefferis, G.S.X.E. (2010). Sexual dimorphism in the  
1116 fly brain. *Curr. Biol.* CB 20, 1589–1601.
- 1117 Camara, N., Whitworth, C., and Van Doren, M. (2008). The creation of sexual dimorphism in the  
1118 *Drosophila* soma. *Curr. Top. Dev. Biol.* 83, 65–107.
- 1119 Castellanos, M.C., Tang, J.C.Y., and Allan, D.W. (2013). Female-biased dimorphism underlies a female-  
1120 specific role for post-embryonic *Ilp7* neurons in *Drosophila* fertility. *Dev. Camb. Engl.* 140, 3915–3926.
- 1121 Chandegra, B., Tang, J.L.Y., Chi, H., and Alic, N. (2017). Sexually dimorphic effects of dietary sugar on  
1122 lifespan, feeding and starvation resistance in *Drosophila*. *Aging* 9, 2521–2528.
- 1123 Chapman, T., Liddle, L.F., Kalb, J.M., Wolfner, M.F., and Partridge, L. (1995). Cost of mating in *Drosophila*  
1124 *melanogaster* females is mediated by male accessory gland products. *Nature* 373, 241–244.
- 1125 Choi, S., Lim, D.-S., and Chung, J. (2015). Feeding and Fasting Signals Converge on the LKB1-SIK3 Pathway  
1126 to Regulate Lipid Metabolism in *Drosophila*. *PLoS Genet.* 11, e1005263.
- 1127 Christiansen, A.E., Keisman, E.L., Ahmad, S.M., and Baker, B.S. (2002). Sex comes in from the cold: the  
1128 integration of sex and pattern. *Trends Genet.* TIG 18, 510–516.
- 1129 Chung, B.Y., Ro, J., Hutter, S.A., Miller, K.M., Guduguntla, L.S., Kondo, S., and Pletcher, S.D. (2017).  
1130 *Drosophila* Neuropeptide F Signaling Independently Regulates Feeding and Sleep-Wake Behavior. *Cell*  
1131 *Rep.* 19, 2441–2450.
- 1132 Claustre, J., Peyrin, L., Fitoussi, R., and Mornex, R. (1980). Sex differences in the adrenergic response to  
1133 hypoglycemic stress in human. *Psychopharmacology (Berl.)* 67, 147–153.
- 1134 Cline, T.W. (1978). Two closely linked mutations in *Drosophila melanogaster* that are lethal to opposite  
1135 sexes and interact with *daughterless*. *Genetics* 90, 683–698.
- 1136 Cline, T.W., and Meyer, B.J. (1996). Vive la différence: males vs females in flies vs worms. *Annu. Rev.*  
1137 *Genet.* 30, 637–702.
- 1138 Clough, E., Jimenez, E., Kim, Y.-A., Whitworth, C., Neville, M.C., Hempel, L.U., Pavlou, H.J., Chen, Z.-X.,  
1139 Sturgill, D., Dale, R.K., et al. (2014). Sex- and tissue-specific functions of *Drosophila doublesex*  
1140 transcription factor target genes. *Dev. Cell* 31, 761–773.
- 1141 Clyne, J.D., and Miesenböck, G. (2008). Sex-specific control and tuning of the pattern generator for  
1142 courtship song in *Drosophila*. *Cell* 133, 354–363.

- 1143 Dart, A.M., Du, X.-J., and Kingwell, B.A. (2002). Gender, sex hormones and autonomic nervous control of  
1144 the cardiovascular system. *Cardiovasc. Res.* *53*, 678–687.
- 1145 Dauwalder, B. (2011). The roles of fruitless and doublesex in the control of male courtship. *Int. Rev.*  
1146 *Neurobiol.* *99*, 87–105.
- 1147 Davis, S.N., Shavers, C., and Costa, F. (2000). Differential gender responses to hypoglycemia are due to  
1148 alterations in CNS drive and not glyceic thresholds. *Am. J. Physiol. Endocrinol. Metab.* *279*, E1054-  
1149 1063.
- 1150 Demir, E., and Dickson, B.J. (2005). *fruitless* splicing specifies male courtship behavior in *Drosophila*. *Cell*  
1151 *121*, 785–794.
- 1152 DiAngelo, J.R., and Birnbaum, M.J. (2009). Regulation of fat cell mass by insulin in *ii*. *Mol. Cell. Biol.* *29*,  
1153 6341–6352.
- 1154 Drake, K., Gateva, E., Deutsch, J., and Cohen, W.R. (1998). Sex differences in the adrenal catecholamine  
1155 response to hypoglycemia in rats. *Metabolism.* *47*, 121–124.
- 1156 Evans, D.S., and Cline, T.W. (2007). *Drosophila melanogaster* Male Somatic Cells Feminized Solely by  
1157 TraF Can Collaborate With Female Germ Cells to Make Functional Eggs. *Genetics* *175*, 631–642.
- 1158 Ferveur, J.F., Stortkuhl, K.F., Stocker, R.F., and Greenspan, R.J. (1995). Genetic feminization of brain  
1159 structures and changed sexual orientation in male *Drosophila*. *Science* *267*, 902–905.
- 1160 Flatt, T. (2011). Survival costs of reproduction in *Drosophila*. *Exp. Gerontol.* *46*, 369–375.
- 1161 Fowler, K., and Partridge, L. (1989). A cost of mating in female fruitflies. *Nature* *338*, 760–761.
- 1162 Francis, V.A., Zorzano, A., and Teleman, A.A. (2010). dDOR is an EcR coactivator that forms a feed-  
1163 forward loop connecting insulin and ecdysone signaling. *Curr. Biol. CB* *20*, 1799–1808.
- 1164 Freedman, R.R., Sabharwal, S.C., and Desai, N. (1987). Sex differences in peripheral vascular adrenergic  
1165 receptors. *Circ. Res.* *61*, 581–585.
- 1166 Gäde, G., and Auerswald, L. (2003). Mode of action of neuropeptides from the adipokinetic hormone  
1167 family. *Gen. Comp. Endocrinol.* *132*, 10–20.
- 1168 Gáliková, M., and Klepsatel, P. (2018). Obesity and Aging in the *Drosophila* Model. *Int. J. Mol. Sci.* *19*,  
1169 E1896.
- 1170 Gáliková, M., Diesner, M., Klepsatel, P., Hehlert, P., Xu, Y., Bickmeyer, I., Predel, R., and Kühnlein, R.P.  
1171 (2015). Energy Homeostasis Control in *Drosophila Adipokinetic Hormone* Mutants. *Genetics* *201*, 665–  
1172 683.
- 1173 Garner, S.R.C., Castellanos, M.C., Baillie, K.E., Lian, T., and Allan, D.W. (2018). *Drosophila* female-specific  
1174 *llp7* motoneurons are generated by Fruitless-dependent cell death in males and by a double-assurance  
1175 survival role for Transformer in females. *Dev. Camb. Engl.* *145*, dev150821.



- 1176 Ghosh, A.C., and O'Connor, M.B. (2014). Systemic Activin signaling independently regulates sugar  
1177 homeostasis, cellular metabolism, and pH balance in *Drosophila melanogaster*. Proc. Natl. Acad. Sci. U.  
1178 S. A. *111*, 5729–5734.
- 1179 Goodwin, S.F., Taylor, B.J., Vilella, A., Foss, M., Ryner, L.C., Baker, B.S., and Hall, J.C. (2000). Aberrant  
1180 splicing and altered spatial expression patterns in *fruitless* mutants of *Drosophila melanogaster*.  
1181 Genetics *154*, 725–745.
- 1182 Grönke, S., Beller, M., Fellert, S., Ramakrishnan, H., Jäckle, H., and Kühnlein, R.P. (2003). Control of Fat  
1183 Storage by a *Drosophila* PAT Domain Protein. Curr. Biol. *13*, 603–606.
- 1184 Grönke, S., Mildner, A., Fellert, S., Tennagels, N., Petry, S., Müller, G., Jäckle, H., and Kühnlein, R.P.  
1185 (2005). Brummer lipase is an evolutionary conserved fat storage regulator in *Drosophila*. Cell Metab. *1*,  
1186 323–330.
- 1187 Grönke, S., Müller, G., Hirsch, J., Fellert, S., Andreou, A., Haase, T., Jäckle, H., and Kühnlein, R.P. (2007).  
1188 Dual lipolytic control of body fat storage and mobilization in *Drosophila*. PLoS Biol. *5*, e137.
- 1189 Grönke, S., Clarke, D.-F., Broughton, S., Andrews, T.D., and Partridge, L. (2010). Molecular Evolution and  
1190 Functional Characterization of *Drosophila* Insulin-Like Peptides. PLOS Genet. *6*, e1000857.
- 1191 Guo, F., Yu, J., Jung, H.J., Abruzzi, K.C., Luo, W., Griffith, L.C., and Rosbash, M. (2016). Circadian Neuron  
1192 Feedback Controls the *Drosophila* Sleep-Activity Profile. Nature *536*, 292–297.
- 1193 Gutierrez, E., Wiggins, D., Fielding, B., and Gould, A.P. (2007). Specialized hepatocyte-like cells regulate  
1194 *Drosophila* lipid metabolism. Nature *445*, 275–280.
- 1195 Hall, J.C. (1994). The Mating of a Fly. Science *264*, 1702–1714.
- 1196 Hansen, M., Flatt, T., and Aguilaniu, H. (2013). Reproduction, Fat Metabolism, and Life Span: What Is the  
1197 Connection? Cell Metab. *17*, 10–19.
- 1198 Heier, C., and Kühnlein, R.P. (2018). Triacylglycerol Metabolism in *Drosophila melanogaster*. Genetics  
1199 *210*, 1163–1184.
- 1200 Heier, C., Klishch, S., Stilbytska, O., Semaniuk, U., and Lushchak, O. (2021). The *Drosophila* model to  
1201 interrogate triacylglycerol biology. Biochim. Biophys. Acta BBA - Mol. Cell Biol. Lipids *1866*, 158924.
- 1202 Heinrichs, V., Ryner, L.C., and Baker, B.S. (1998). Regulation of sex-specific selection of *fruitless* 5' splice  
1203 sites by transformer and transformer-2. Mol. Cell. Biol. *18*, 450–458.
- 1204 Helfrich-Förster, C. (2000). Differential control of morning and evening components in the activity  
1205 rhythm of *Drosophila melanogaster*--sex-specific differences suggest a different quality of activity. J.  
1206 Biol. Rhythms *15*, 135–154.
- 1207 Hentze, J.L., Carlsson, M.A., Kondo, S., Nässel, D.R., and Rewitz, K.F. (2015). The Neuropeptide  
1208 Allatostatin A Regulates Metabolism and Feeding Decisions in *Drosophila*. Sci. Rep. *5*, 11680.

- 1209 Hinojosa-Laborde, C., Chapa, I., Lange, D., and Haywood, J.R. (1999). Gender differences in sympathetic  
1210 nervous system regulation. *Clin. Exp. Pharmacol. Physiol.* 26, 122–126.
- 1211 Hoeker, G.S., Hood, A.R., Katra, R.P., Poelzing, S., and Pogwizd, S.M. (2014). Sex Differences in  $\beta$ -  
1212 Adrenergic Responsiveness of Action Potentials and Intracellular Calcium Handling in Isolated Rabbit  
1213 Hearts. *PLoS ONE* 9, e111411.
- 1214 Hogarth, A.J., Mackintosh, A.F., and Mary, D.A.S.G. (2007). Gender-related differences in the  
1215 sympathetic vasoconstrictor drive of normal subjects. *Clin. Sci. Lond. Engl.* 1979 112, 353–361.
- 1216 Hoshijima, K., Inoue, K., Higuchi, I., Sakamoto, H., and Shimura, Y. (1991). Control of *doublesex*  
1217 alternative splicing by transformer and transformer-2 in *Drosophila*. *Science* 252, 833–836.
- 1218 Huang, R., Song, T., Su, H., Lai, Z., Qin, W., Tian, Y., Dong, X., and Wang, L. (2020). High-fat diet enhances  
1219 starvation-induced hyperactivity via sensitizing hunger-sensing neurons in *Drosophila*. *ELife* 9, e53103.
- 1220 Huber, R., Hill, S.L., Holladay, C., Biesiadecki, M., Tononi, G., and Cirelli, C. (2004). Sleep homeostasis in  
1221 *Drosophila melanogaster*. *Sleep* 27, 628–639.
- 1222 Hudry, B., Khadayate, S., and Miguel-Aliaga, I. (2016). The sexual identity of adult intestinal stem cells  
1223 controls organ size and plasticity. *Nature* 530, 344–348.
- 1224 Hudry, B., de Goeij, E., Mineo, A., Gaspar, P., Hadjieconomou, D., Studd, C., Mokochinski, J.B., Kramer,  
1225 H.B., Plaçais, P.-Y., Preat, T., et al. (2019). Sex Differences in Intestinal Carbohydrate Metabolism  
1226 Promote Food Intake and Sperm Maturation. *Cell* 178, 901-918.e16.
- 1227 Hughson, B.N., Shimell, M., and O'Connor, M.B. (2021). AKH Signaling in *D. melanogaster* Alters Larval  
1228 Development in a Nutrient-Dependent Manner That Influences Adult Metabolism. *Front. Physiol.* 12.
- 1229 Inoue, K., Hoshijima, K., Sakamoto, H., and Shimura, Y. (1990). Binding of the *Drosophila sex-lethal* gene  
1230 product to the alternative splice site of *transformer* primary transcript. *Nature* 344, 461–463.
- 1231 Inoue, K., Hoshijima, K., Higuchi, I., Sakamoto, H., and Shimura, Y. (1992). Binding of the *Drosophila*  
1232 transformer and transformer-2 proteins to the regulatory elements of *doublesex* primary transcript for  
1233 sex-specific RNA processing. *Proc. Natl. Acad. Sci. U. S. A.* 89, 8092–8096.
- 1234 Isabel, G., Martin, J.-R., Chidami, S., Veenstra, J.A., and Rosay, P. (2005). AKH-producing neuroendocrine  
1235 cell ablation decreases trehalose and induces behavioral changes in *Drosophila*. *Am. J. Physiol. Regul.*  
1236 *Integr. Comp. Physiol.* 288, R531-538.
- 1237 Ito, H., Fujitani, K., Usui, K., Shimizu-Nishikawa, K., Tanaka, S., and Yamamoto, D. (1996). Sexual  
1238 orientation in *Drosophila* is altered by the satori mutation in the sex-determination gene *fruitless* that  
1239 encodes a zinc finger protein with a BTB domain. *Proc. Natl. Acad. Sci. U. S. A.* 93, 9687–9692.
- 1240 Jackson, A.S., Stanforth, P.R., Gagnon, J., Rankinen, T., Leon, A.S., Rao, D.C., Skinner, J.S., Bouchard, C.,  
1241 and Wilmore, J.H. (2002). The effect of sex, age and race on estimating percentage body fat from body  
1242 mass index: The Heritage Family Study. *Int. J. Obes.* 26, 789–796.

- 1243 Johnson, A.A., and Stolzing, A. (2019). The role of lipid metabolism in aging, lifespan regulation, and age-  
1244 related disease. *Aging Cell* *18*, e13048.
- 1245 Kamareddine, L., Robins, W.P., Berkey, C.D., Mekalanos, J.J., and Watnick, P.I. (2018). The *Drosophila*  
1246 Immune Deficiency Pathway Modulates Enteroendocrine Function and Host Metabolism. *Cell Metab.*  
1247 *28*, 449-462.e5.
- 1248 Kang, P., Chang, K., Liu, Y., Bouska, M., Birnbaum, A., Karashchuk, G., Thakore, R., Zheng, W., Post, S.,  
1249 Brent, C.S., et al. (2017). *Drosophila* Kruppel homolog 1 represses lipolysis through interaction with  
1250 dFOXO. *Sci. Rep.* *7*, 16369.
- 1251 Karastergiou, K., Smith, S.R., Greenberg, A.S., and Fried, S.K. (2012). Sex differences in human adipose  
1252 tissues – the biology of pear shape. *Biol. Sex Differ.* *3*, 13.
- 1253 Kimura, K., Urushizaki, A., Sato, C., and Yamamoto, D. (2019). A novel sex difference in *Drosophila*  
1254 contact chemosensory neurons unveiled using single cell labeling. *J. Neurogenet.* *33*, 116–124.
- 1255 Kubrak, O., Jensen, L., Ahrentlöv, N., Koyama, T., Malita, A., Naseem, M.T., Lassen, M., Nagy, S., Texada,  
1256 M.J., Halberg, K.A., et al. (2020). The gut hormone Allatostatin C regulates food intake and metabolic  
1257 homeostasis under nutrient stress. *BioRxiv* 2020.12.05.412874.
- 1258 Kühnlein, R.P. (2012). Lipid droplet-based storage fat metabolism in *Drosophila*: Thematic Review Series:  
1259 Lipid Droplet Synthesis and Metabolism: from Yeast to Man. *J. Lipid Res.* *53*, 1430–1436.
- 1260 Kvitsiani, D., and Dickson, B.J. (2006). Shared neural circuitry for female and male sexual behaviours in  
1261 *Drosophila*. *Curr. Biol.* *16*, R355–R356.
- 1262 Lafontan, M., Barbe, P., Galitzky, J., Tavernier, G., Langin, D., Carpéné, C., Bousquet-Melou, A., and  
1263 Berlan, M. (1997). Adrenergic regulation of adipocyte metabolism. *Hum. Reprod. Oxf. Engl.* *12 Suppl 1*,  
1264 6–20.
- 1265 Lease, H.M., and Wolf, B.O. (2011). Lipid content of terrestrial arthropods in relation to body size,  
1266 phylogeny, ontogeny and sex. *Physiol. Entomol.* *36*, 29–38.
- 1267 Lee, G., and Hall, J.C. (2001). Abnormalities of male-specific FRU protein and serotonin expression in the  
1268 CNS of *fruitless* mutants in *Drosophila*. *J. Neurosci. Off. J. Soc. Neurosci.* *21*, 513–526.
- 1269 Lee, G., and Park, J.H. (2004). Hemolymph sugar homeostasis and starvation-induced hyperactivity  
1270 affected by genetic manipulations of the *adipokinetic hormone*-encoding gene in *Drosophila*  
1271 *melanogaster*. *Genetics* *167*, 311–323.
- 1272 Lee, B., Barretto, E.C., and Grewal, S.S. (2019). TORC1 modulation in adipose tissue is required for  
1273 organismal adaptation to hypoxia in *Drosophila*. *Nat. Commun.* *10*, 1878.
- 1274 Lehmann, M. (2018). Endocrine and physiological regulation of neutral fat storage in *Drosophila*. *Mol.*  
1275 *Cell. Endocrinol.* *461*, 165–177.

- 1276 Li, H., Janssens, J., Waegeneer, M.D., Kolluru, S.S., Davie, K., Gardeux, V., Saelens, W., David, F., Brbić,  
1277 M., Leskovec, J., et al. (2021). Fly Cell Atlas: a single-cell transcriptomic atlas of the adult fruit fly. *BioRxiv*  
1278 2021.07.04.451050.
- 1279 Li, Y., Hoffmann, J., Li, Y., Stephano, F., Bruchhaus, I., Fink, C., and Roeder, T. (2016). Octopamine  
1280 controls starvation resistance, life span and metabolic traits in *Drosophila*. *Sci. Rep.* *6*, 35359.
- 1281 Liao, S., Amcoff, M., and Nässel, D.R. (2021). Impact of high-fat diet on lifespan, metabolism, fecundity  
1282 and behavioral senescence in *Drosophila*. *Insect Biochem. Mol. Biol.* *133*, 103495.
- 1283 Lorenz, M.W., and Gäde, G. (2009). Hormonal regulation of energy metabolism in insects as a driving  
1284 force for performance. *Integr. Comp. Biol.* *49*, 380–392.
- 1285 Luong, N., Davies, C.R., Wessells, R.J., Graham, S.M., King, M.T., Veech, R., Bodmer, R., and Oldham, S.M.  
1286 (2006). Activated FOXO-mediated insulin resistance is blocked by reduction of TOR activity. *Cell Metab.*  
1287 *4*, 133–142.
- 1288 Luzier, A.B., Nawarskas, J.J., Añonuevo, J., Wilson, M.F., and Kazierad, D.J. (1998). The effects of gender  
1289 on adrenergic receptor responsiveness. *J. Clin. Pharmacol.* *38*, 618–624.
- 1290 Masuyama, K., Zhang, Y., Rao, Y., and Wang, J.W. (2012). Mapping neural circuits with activity-  
1291 dependent nuclear import of a transcription factor. *J. Neurogenet.* *26*, 89–102.
- 1292 Mathews, K.W., Cavegn, M., and Zwicky, M. (2017). Sexual Dimorphism of Body Size Is Controlled by  
1293 Dosage of the X-Chromosomal Gene *Myc* and by the Sex-Determining Gene *tra* in *Drosophila*. *Genetics*  
1294 *205*, 1215–1228.
- 1295 May, C.E., Rosander, J., Gottfried, J., Dennis, E., and Dus, M. (2020). Dietary sugar inhibits satiation by  
1296 decreasing the central processing of sweet taste. *ELife* *9*, e54530.
- 1297 McIntosh, V.J., Chandrasekera, P.C., and Lasley, R.D. (2011). Sex differences and the effects of  
1298 ovariectomy on the  $\beta$ -adrenergic contractile response. *Am. J. Physiol. - Heart Circ. Physiol.* *301*, H1127–  
1299 H1134.
- 1300 Mellert, D.J., Knapp, J.-M., Manoli, D.S., Meissner, G.W., and Baker, B.S. (2010). Midline crossing by  
1301 gustatory receptor neuron axons is regulated by fruitless, doublesex and the Roundabout receptors.  
1302 *Dev. Camb. Engl.* *137*, 323–332.
- 1303 Mellert, D.J., Williamson, W.R., Shirangi, T.R., Card, G.M., and Truman, J.W. (2016). Genetic and  
1304 Environmental Control of Neurodevelopmental Robustness in *Drosophila*. *PLoS ONE* *11*, e0155957.
- 1305 Millington, J.W., and Rideout, E.J. (2018). Sex differences in *Drosophila* development and physiology.  
1306 *Curr. Opin. Physiol.* *6*, 46–56.
- 1307 Millington, J.W., Brownrigg, G.P., Chao, C., Sun, Z., Basner-Collins, P.J., Wat, L.W., Hudry, B., Miguel-  
1308 Aliaga, I., and Rideout, E.J. (2021). Female-biased upregulation of insulin pathway activity mediates the  
1309 sex difference in *Drosophila* body size plasticity. *ELife* *10*, e58341.

- 1310 Min, S., Chae, H.-S., Jang, Y.-H., Choi, S., Lee, S., Jeong, Y.T., Jones, W.D., Moon, S.J., Kim, Y.-J., and  
1311 Chung, J. (2016). Identification of a Peptidergic Pathway Critical to Satiety Responses in *Drosophila*. *Curr.*  
1312 *Biol.* *26*, 814–820.
- 1313 Mochanová, M., Tomčala, A., Svobodová, Z., and Kodrík, D. (2018). Role of adipokinetic hormone during  
1314 starvation in *Drosophila*. *Comp. Biochem. Physiol. B Biochem. Mol. Biol.* *226*, 26–35.
- 1315 Mosher, J., Zhang, W., Blumhagen, R.Z., D’Alessandro, A., Nemkov, T., Hansen, K.C., Hesselberth, J.R.,  
1316 and Reis, T. (2015). Coordination between *Drosophila* Arc1 and a specific population of brain neurons  
1317 regulates organismal fat. *Dev. Biol.* *405*, 280–290.
- 1318 Murphy, D.J. (2001). The biogenesis and functions of lipid bodies in animals, plants and microorganisms.  
1319 *Prog. Lipid Res.* *40*, 325–438.
- 1320 Nagoshi, R.N., McKeown, M., Burtis, K.C., Belote, J.M., and Baker, B.S. (1988). The control of alternative  
1321 splicing at genes regulating sexual differentiation in *D. melanogaster*. *Cell* *53*, 229–236.
- 1322 Nelson, C.S., Beck, J.N., Wilson, K.A., Pilcher, E.R., Kapahi, P., and Brem, R.B. (2016). Cross-phenotype  
1323 association tests uncover genes mediating nutrient response in *Drosophila*. *BMC Genomics* *17*, 867.
- 1324 Neville, M.C., Nojima, T., Ashley, E., Parker, D.J., Walker, J., Southall, T., Van de Sande, B., Marques, A.C.,  
1325 Fischer, B., Brand, A.H., et al. (2014). Male-specific fruitless isoforms target neurodevelopmental genes  
1326 to specify a sexually dimorphic nervous system. *Curr. Biol. CB* *24*, 229–241.
- 1327 Ng, A.V., Callister, R., Johnson, D.G., and Seals, D.R. (1993). Age and gender influence muscle  
1328 sympathetic nerve activity at rest in healthy humans. *Hypertens. Dallas Tex* *1979* *21*, 498–503.
- 1329 Nojima, T., Neville, M.C., and Goodwin, S.F. (2014). Fruitless isoforms and target genes specify the  
1330 sexually dimorphic nervous system underlying *Drosophila* reproductive behavior. *Fly (Austin)* *8*, 95–100.
- 1331 Nojima, T., Rings, A., Allen, A.M., Otto, N., Verschut, T.A., Billeter, J.-C., Neville, M.C., and Goodwin, S.F.  
1332 (2021). A sex-specific switch between visual and olfactory inputs underlies adaptive sex differences in  
1333 behavior. *Curr. Biol.* *31*, 1175-1191.e6.
- 1334 Noyes, B.E., Katz, F.N., and Schaffer, M.H. (1995). Identification and expression of the *Drosophila*  
1335 *adipokinetic hormone* gene. *Mol. Cell. Endocrinol.* *109*, 133–141.
- 1336 Oh, Y., Lai, J.S.-Y., Mills, H.J., Erdjument-Bromage, H., Giammarinaro, B., Saadipour, K., Wang, J.G., Abu,  
1337 F., Neubert, T.A., and Suh, G.S.B. (2019). A glucose-sensing neuron pair regulates insulin and glucagon in  
1338 *Drosophila*. *Nature* *574*, 559–564.
- 1339 Park, A., Tran, T., and Atkinson, N.S. (2018). Monitoring food preference in *Drosophila* by  
1340 oligonucleotide tagging. *Proc. Natl. Acad. Sci. U. S. A.* *115*, 9020–9025.
- 1341 Park, Y., Kim, Y.-J., and Adams, M.E. (2002). Identification of G protein-coupled receptors for *Drosophila*  
1342 PRXamide peptides, CCAP, corazonin, and AKH supports a theory of ligand-receptor coevolution. *Proc.*  
1343 *Natl. Acad. Sci.* *99*, 11423–11428.

- 1344 Patel, R.T., Soulages, J.L., Hariharasundaram, B., and Arrese, E.L. (2005). Activation of the Lipid Droplet  
1345 Controls the Rate of Lipolysis of Triglycerides in the Insect Fat Body\*. *J. Biol. Chem.* *280*, 22624–22631.
- 1346 Pavlou, H.J., Lin, A.C., Neville, M.C., Nojima, T., Diao, F., Chen, B.E., White, B.H., and Goodwin, S.F.  
1347 (2016). Neural circuitry coordinating male copulation. *ELife* *5*, e20713.
- 1348 von Philipsborn, A.C., Jörchel, S., Tirian, L., Demir, E., Morita, T., Stern, D.L., and Dickson, B.J. (2014).  
1349 Cellular and behavioral functions of fruitless isoforms in *Drosophila* courtship. *Curr. Biol. CB* *24*, 242–  
1350 251.
- 1351 Phillips, M.D., and Thomas, G.H. (2006). Brush border spectrin is required for early endosome recycling  
1352 in *Drosophila*. *J. Cell Sci.* *119*, 1361–1370.
- 1353 Pomatto, L.C.D., Carney, C., Shen, B., Wong, S., Halaszynski, K., Salomon, M.P., Davies, K.J.A., and Tower,  
1354 J. (2017). The Mitochondrial Lon Protease Is Required for Age-Specific and Sex-Specific Adaptation to  
1355 Oxidative Stress. *Curr. Biol. CB* *27*, 1–15.
- 1356 Post, S., Liao, S., Yamamoto, R., Veenstra, J.A., Nässel, D.R., and Tatar, M. (2019). *Drosophila* insulin-like  
1357 peptide *dilp1* increases lifespan and glucagon-like *Akh* expression epistatic to *dilp2*. *Aging Cell* *18*,  
1358 e12863.
- 1359 Power, M.L., and Schulkin, J. (2008). Sex differences in fat storage, fat metabolism, and the health risks  
1360 from obesity: possible evolutionary origins. *Br. J. Nutr.* *99*, 931–940.
- 1361 Predel, R., Wegener, C., Russell, W.K., Tichy, S.E., Russell, D.H., and Nachman, R.J. (2004). Peptidomics of  
1362 CNS-associated neurohemal systems of adult *Drosophila melanogaster*: A mass spectrometric survey of  
1363 peptides from individual flies. *J. Comp. Neurol.* *474*, 379–392.
- 1364 Rajan, A., and Perrimon, N. (2012). The *Drosophila* cytokine Unpaired 2 regulates physiological  
1365 homeostasis by remotely controlling Insulin secretion. *Cell* *151*, 123–137.
- 1366 Reczens, E., Mouisel, E., and Langin, D. (2021). Hormone-sensitive lipase: sixty years later. *Prog. Lipid*  
1367 *Res.* *82*, 101084.
- 1368 Reddiex, A.J., Gosden, T.P., Bonduriansky, R., and Chenoweth, S.F. (2013). Sex-specific fitness  
1369 consequences of nutrient intake and the evolvability of diet preferences. *Am. Nat.* *182*, 91–102.
- 1370 Regan, J.C., Khericha, M., Dobson, A.J., Bolukbasi, E., Rattanavirotkul, N., and Partridge, L. (2016). Sex  
1371 difference in pathology of the ageing gut mediates the greater response of female lifespan to dietary  
1372 restriction. *ELife* *5*, e10956.
- 1373 Rezával, C., Nojima, T., Neville, M.C., Lin, A.C., and Goodwin, S.F. (2014). Sexually dimorphic  
1374 octopaminergic neurons modulate female postmating behaviors in *Drosophila*. *Curr. Biol. CB* *24*, 725–  
1375 730.
- 1376 Rezával, C., Pattnaik, S., Pavlou, H.J., Nojima, T., Brüggemeier, B., D'Souza, L.A.D., Dweck, H.K.M., and  
1377 Goodwin, S.F. (2016). Activation of Latent Courtship Circuitry in the Brain of *Drosophila* Females Induces  
1378 Male-like Behaviors. *Curr. Biol. CB* *26*, 2508–2515.



- 1379 Rideout, E.J., Billeter, J.-C., and Goodwin, S.F. (2007). The sex-determination genes *fruitless* and  
1380 *doublesex* specify a neural substrate required for courtship song. *Curr. Biol.* *CB 17*, 1473–1478.
- 1381 Rideout, E.J., Dornan, A.J., Neville, M.C., Eadie, S., and Goodwin, S.F. (2010). Control of sexual  
1382 differentiation and behavior by the *doublesex* gene in *Drosophila melanogaster*. *Nat. Neurosci.* *13*, 458–  
1383 466.
- 1384 Rideout, E.J., Narsaiya, M.S., and Grewal, S.S. (2015). The Sex Determination Gene *transformer*  
1385 Regulates Male-Female Differences in *Drosophila* Body Size. *PLoS Genet.* *11*, e1005683.
- 1386 Robinett, C.C., Vaughan, A.G., Knapp, J.-M., and Baker, B.S. (2010). Sex and the Single Cell. II. There Is a  
1387 Time and Place for Sex. *PLOS Biol.* *8*, e1000365.
- 1388 Roth, S.W., Bitterman, M.D., Birnbaum, M.J., and Bland, M.L. (2018). Innate Immune Signaling in  
1389 *Drosophila* Blocks Insulin Signaling by Uncoupling PI(3,4,5)P3 Production and Akt Activation. *Cell Rep.* *22*,  
1390 2550–2556.
- 1391 Ryner, L.C., Goodwin, S.F., Castrillon, D.H., Anand, A., Vilella, A., Baker, B.S., Hall, J.C., Taylor, B.J., and  
1392 Wasserman, S.A. (1996). Control of male sexual behavior and sexual orientation in *Drosophila* by the  
1393 *fruitless* gene. *Cell* *87*, 1079–1089.
- 1394 Salz, H.K., and Erickson, J.W. (2010). Sex determination in *Drosophila*: The view from the top. *Fly (Austin)*  
1395 *4*, 60–70.
- 1396 Sato, K., Goto, J., and Yamamoto, D. (2019). Sex Mysteries of the Fly Courtship Master Regulator  
1397 Fruitless. *Front. Behav. Neurosci.* *13*, 245.
- 1398 Sawala, A., and Gould, A.P. (2017). The sex of specific neurons controls female body growth in  
1399 *Drosophila*. *PLoS Biol.* *15*, e2002252.
- 1400 Schindelin, J., Arganda-Carreras, I., Frise, E., Kaynig, V., Longair, M., Pietzsch, T., Preibisch, S., Rueden, C.,  
1401 Saalfeld, S., Schmid, B., et al. (2012). Fiji: an open-source platform for biological-image analysis. *Nat.*  
1402 *Methods* *9*, 676–682.
- 1403 Schreiber, R., Xie, H., and Schweiger, M. (2019). Of mice and men: The physiological role of adipose  
1404 triglyceride lipase (ATGL). *Biochim. Biophys. Acta BBA - Mol. Cell Biol. Lipids* *1864*, 880–899.
- 1405 Scopelliti, A., Bauer, C., Yu, Y., Zhang, T., Kruspig, B., Murphy, D.J., Vidal, M., Maddocks, O.D.K., and  
1406 Cordero, J.B. (2019). A Neuronal Relay Mediates a Nutrient Responsive Gut/Fat Body Axis Regulating  
1407 Energy Homeostasis in Adult *Drosophila*. *Cell Metab.* *29*, 269-284.e10.
- 1408 Shirangi, T.R., Wong, A.M., Truman, J.W., and Stern, D.L. (2016). Doublesex Regulates the Connectivity of  
1409 a Neural Circuit Controlling *Drosophila* Male Courtship Song. *Dev. Cell* *37*, 533–544.
- 1410 Sieber, M.H., and Spradling, A.C. (2015). Steroid Signaling Establishes a Female Metabolic State and  
1411 Regulates SREBP to Control Oocyte Lipid Accumulation. *Curr. Biol.* *25*, 993–1004.
- 1412 Siera, S.G., and Cline, T.W. (2008). Sexual back talk with evolutionary implications: stimulation of the  
1413 *Drosophila* sex-determination gene *sex-lethal* by its target *transformer*. *Genetics* *180*, 1963–1981.

- 1414 Song, W., Veenstra, J.A., and Perrimon, N. (2014). Control of Lipid Metabolism by Tachykinin in  
1415 *Drosophila*. *Cell Rep.* *9*, 40–47.
- 1416 Song, W., Cheng, D., Hong, S., Sappe, B., Hu, Y., Wei, N., Zhu, C., O'Connor, M.B., Pissios, P., and  
1417 Perrimon, N. (2017). Midgut-Derived Activin Regulates Glucagon-like Action in the Fat Body and  
1418 Glycemic Control. *Cell Metab.* *25*, 386–399.
- 1419 Sosnowski, B.A., Belote, J.M., and McKeown, M. (1989). Sex-specific alternative splicing of RNA from the  
1420 *transformer* gene results from sequence-dependent splice site blockage. *Cell* *58*, 449–459.
- 1421 Stafford, J.W., Lynd, K.M., Jung, A.Y., and Gordon, M.D. (2012). Integration of taste and calorie sensing in  
1422 *Drosophila*. *J. Neurosci. Off. J. Soc. Neurosci.* *32*, 14767–14774.
- 1423 Staubli, F., Jorgensen, T.J.D., Cazzamali, G., Williamson, M., Lenz, C., Sondergaard, L., Roepstorff, P., and  
1424 Grimmekhuijzen, C.J.P. (2002). Molecular identification of the insect adipokinetic hormone receptors.  
1425 *Proc. Natl. Acad. Sci. U. S. A.* *99*, 3446–3451.
- 1426 Sturtevant, A.H. (1945). A Gene in *Drosophila Melanogaster* That Transforms Females into Males.  
1427 *Genetics* *30*, 297–299.
- 1428 Suzawa, M., Muhammad, N.M., Joseph, B.S., and Bland, M.L. (2019). The Toll Signaling Pathway Targets  
1429 the Insulin-like Peptide Dilp6 to Inhibit Growth in *Drosophila*. *Cell Rep.* *28*, 1439-1446.e5.
- 1430 Taylor, B.J., and Truman, J.W. (1992). Commitment of abdominal neuroblasts in *Drosophila* to a male or  
1431 female fate is dependent on genes of the sex-determining hierarchy. *Dev. Camb. Engl.* *114*, 625–642.
- 1432 Teixeira, L., Rabouille, C., Rørth, P., Ephrussi, A., and Vanzo, N.F. (2003). *Drosophila* Perilipin/ADRP  
1433 homologue Lsd2 regulates lipid metabolism. *Mech. Dev.* *120*, 1071–1081.
- 1434 Teleman, A.A., Chen, Y.-W., and Cohen, S.M. (2005). 4E-BP functions as a metabolic brake used under  
1435 stress conditions but not during normal growth. *Genes Dev.* *19*, 1844–1848.
- 1436 Tennessen, J.M., Barry, W., Cox, J., and Thummel, C.S. (2014). Methods for studying metabolism in  
1437 *Drosophila*. *Methods San Diego Calif* *68*, 105–115.
- 1438 Texada, M.J., Jørgensen, A.F., Christensen, C.F., Koyama, T., Malita, A., Smith, D.K., Marple, D.F.M.,  
1439 Danielsen, E.T., Petersen, S.K., Hansen, J.L., et al. (2019). A fat-tissue sensor couples growth to oxygen  
1440 availability by remotely controlling insulin secretion. *Nat. Commun.* *10*, 1955.
- 1441 Thiele, C., and Spandl, J. (2008). Cell biology of lipid droplets. *Curr. Opin. Cell Biol.* *20*, 378–385.
- 1442 Thurmond, J., Goodman, J.L., Strelets, V.B., Attrill, H., Gramates, L.S., Marygold, S.J., Matthews, B.B.,  
1443 Millburn, G., Antonazzo, G., Trovisco, V., et al. (2019). FlyBase 2.0: the next generation. *Nucleic Acids*  
1444 *Res.* *47*, D759–D765.
- 1445 Tian, Y., Bi, J., Shui, G., Liu, Z., Xiang, Y., Liu, Y., Wenk, M.R., Yang, H., and Huang, X. (2011). Tissue-  
1446 autonomous function of *Drosophila* seipin in preventing ectopic lipid droplet formation. *PLoS Genet.* *7*,  
1447 e1001364.

- 1448 Ugrankar, R., Liu, Y., Provaznik, J., Schmitt, S., and Lehmann, M. (2011). Lipin is a central regulator of  
1449 adipose tissue development and function in *Drosophila melanogaster*. *Mol. Cell. Biol.* *31*, 1646–1656.
- 1450 Videlier, M., Rundle, H.D., and Careau, V. (2019). Sex-Specific Among-Individual Covariation in  
1451 Locomotor Activity and Resting Metabolic Rate in *Drosophila melanogaster*. *Am. Nat.* *194*, E164–E176.
- 1452 Walther, T.C., and Farese, R.V. (2012). Lipid Droplets and Cellular Lipid Metabolism. *Annu. Rev. Biochem.*  
1453 *81*, 687–714.
- 1454 Wang, F., Wang, K., Forknall, N., Patrick, C., Yang, T., Parekh, R., Bock, D., and Dickson, B.J. (2020).  
1455 Neural circuitry linking mating and egg-laying in *Drosophila* females. *Nature* *579*, 101–105.
- 1456 Wang, H., Becuwe, M., Housden, B.E., Chitraju, C., Porras, A.J., Graham, M.M., Liu, X.N., Thiam, A.R.,  
1457 Savage, D.B., Agarwal, A.K., et al. (2016). Seipin is required for converting nascent to mature lipid  
1458 droplets. *ELife* *5*, e16582.
- 1459 Wat, L.W., Chao, C., Bartlett, R., Buchanan, J.L., Millington, J.W., Chih, H.J., Chowdhury, Z.S., Biswas, P.,  
1460 Huang, V., Shin, L.J., et al. (2020). A role for triglyceride lipase *brummer* in the regulation of sex  
1461 differences in *Drosophila* fat storage and breakdown. *PLOS Biol.* *18*, e3000595.
- 1462 Watanabe, L.P., and Riddle, N.C. (2021). GWAS reveal a role for the central nervous system in regulating  
1463 weight and weight change in response to exercise. *Sci. Rep.* *11*, 5144.
- 1464 Wegener, C., Reinl, T., Jänsch, L., and Predel, R. (2006). Direct mass spectrometric peptide profiling and  
1465 fragmentation of larval peptide hormone release sites in *Drosophila melanogaster* reveals tagma-  
1466 specific peptide expression and differential processing. *J. Neurochem.* *96*, 1362–1374.
- 1467 White, K., Tahaoglu, E., and Steller, H. (1996). Cell killing by the *Drosophila* gene *reaper*. *Science* *271*,  
1468 805–807.
- 1469 Womersley, J., and Durnin, J.V.G.A. (1977). A comparison of the skinfold method with extent of  
1470 'overweight' and various weight-height relationships in the assessment of obesity. *Br. J. Nutr.* *38*, 271–  
1471 284.
- 1472 Zhan, Y.P., Liu, L., and Zhu, Y. (2016). Taotie neurons regulate appetite in *Drosophila*. *Nat. Commun.* *7*,  
1473 13633.
- 1474 Zhao, X., and Karpac, J. (2017). Muscle Directs Diurnal Energy Homeostasis through a Myokine-  
1475 Dependent Hormone Module in *Drosophila*. *Curr. Biol.* *CB 27*, 1941-1955.e6.
- 1476

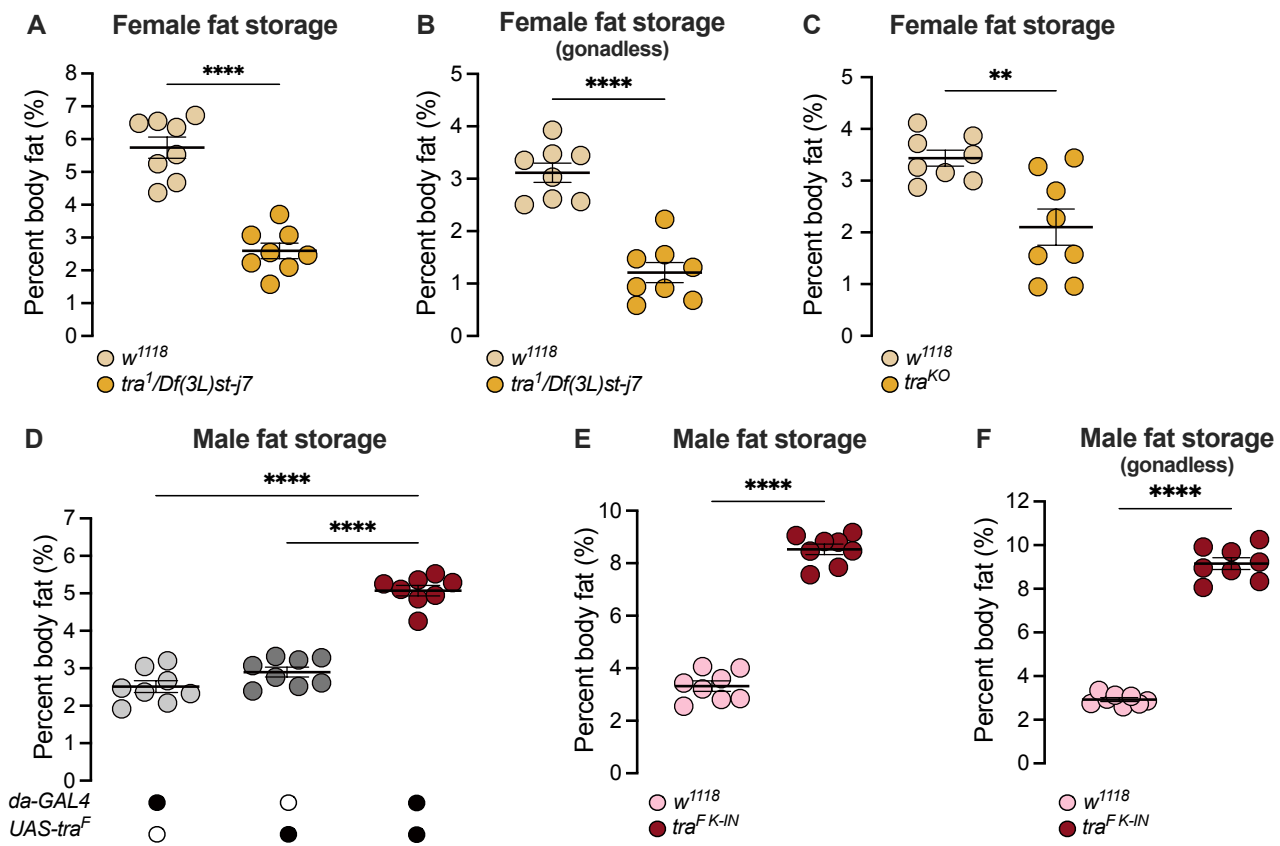

FIGURE 1

**A Female starvation resistance**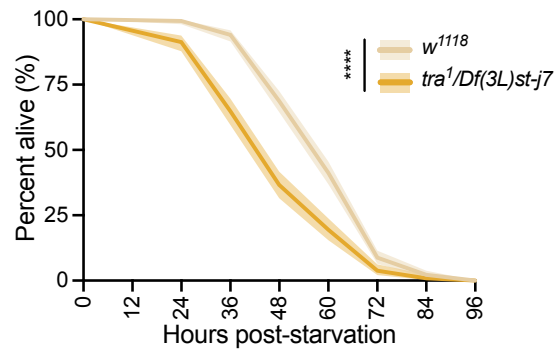**B Male starvation resistance**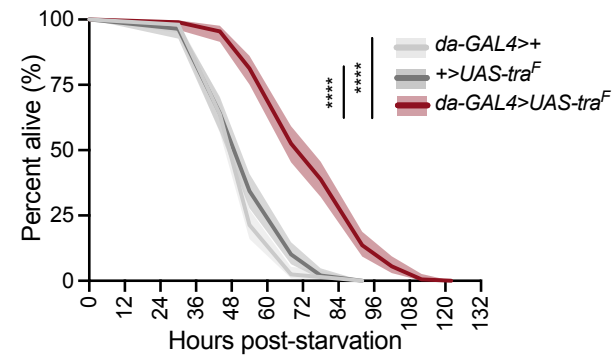**C Male starvation resistance**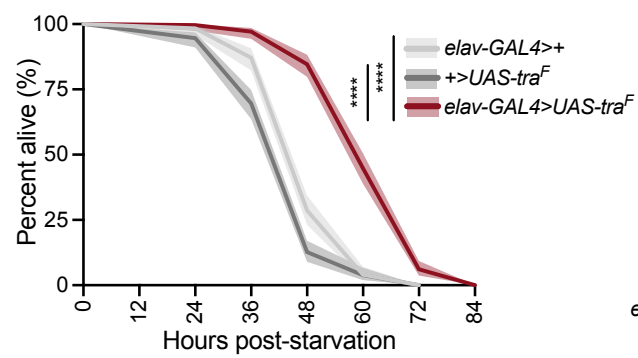**D Male fat storage**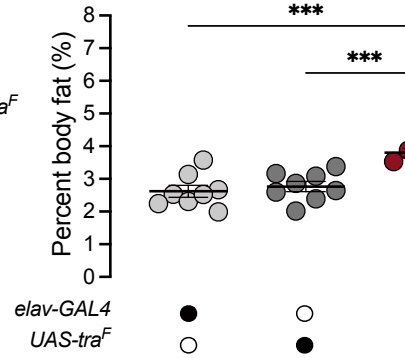**E Male starvation resistance**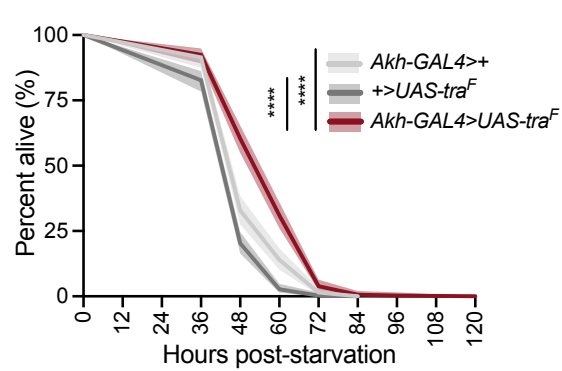**F Male fat storage**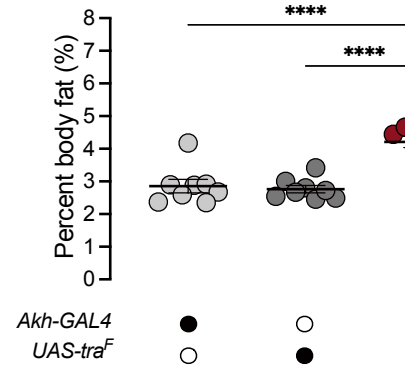

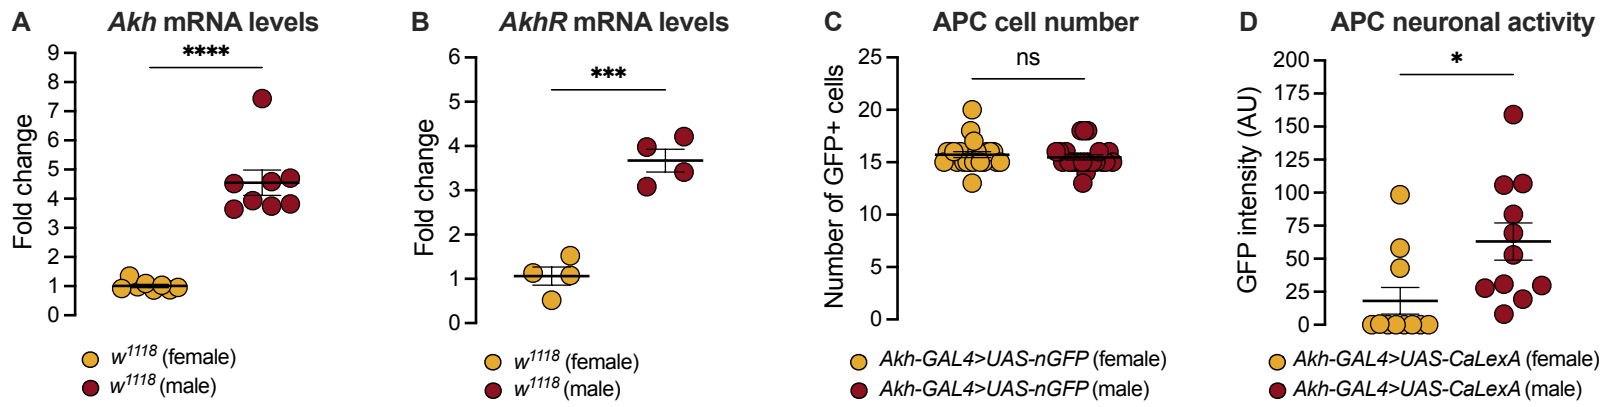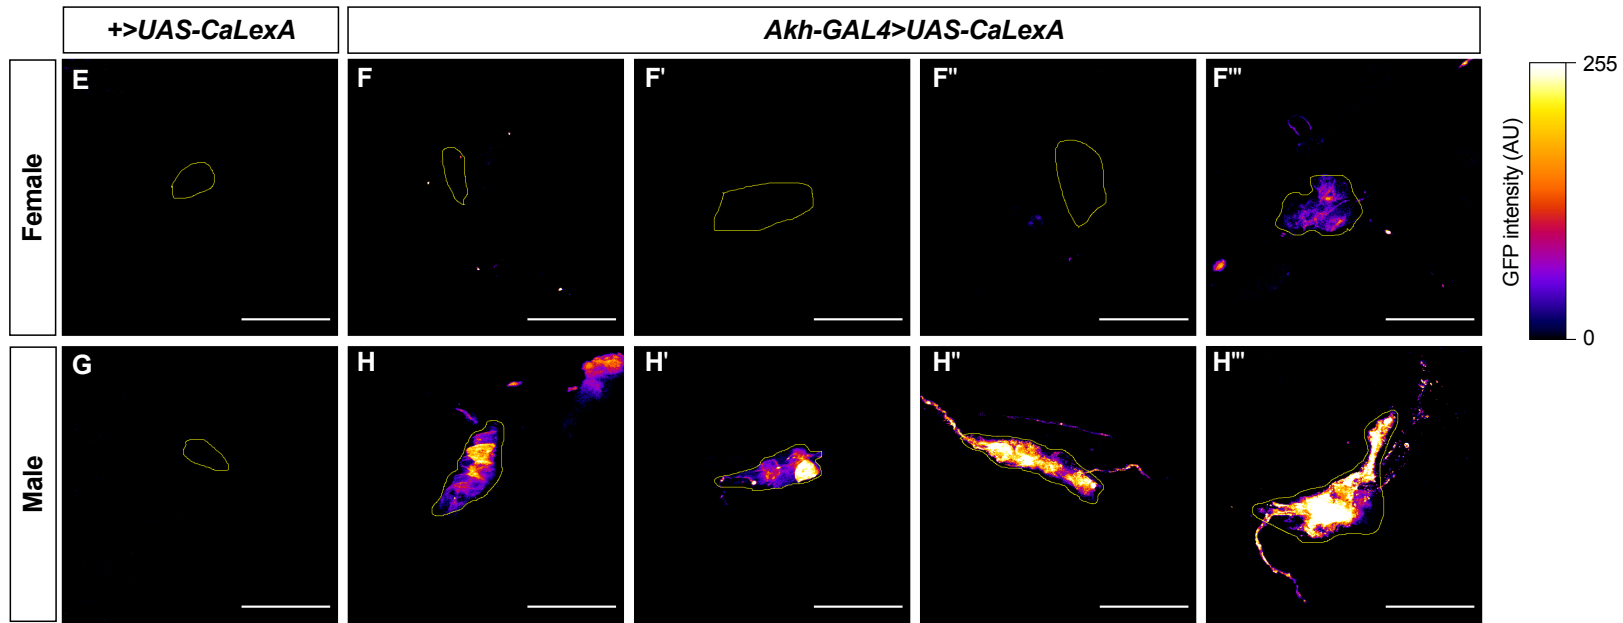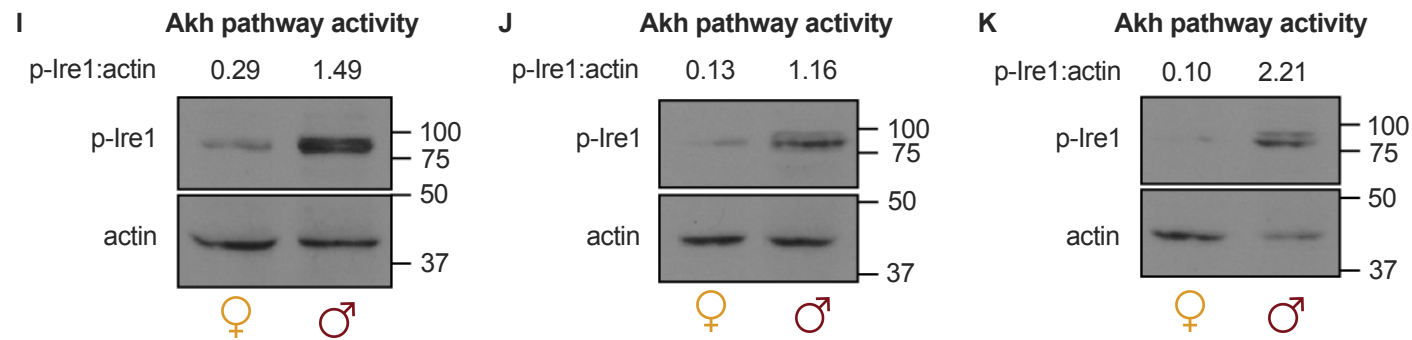

**FIGURE 3**



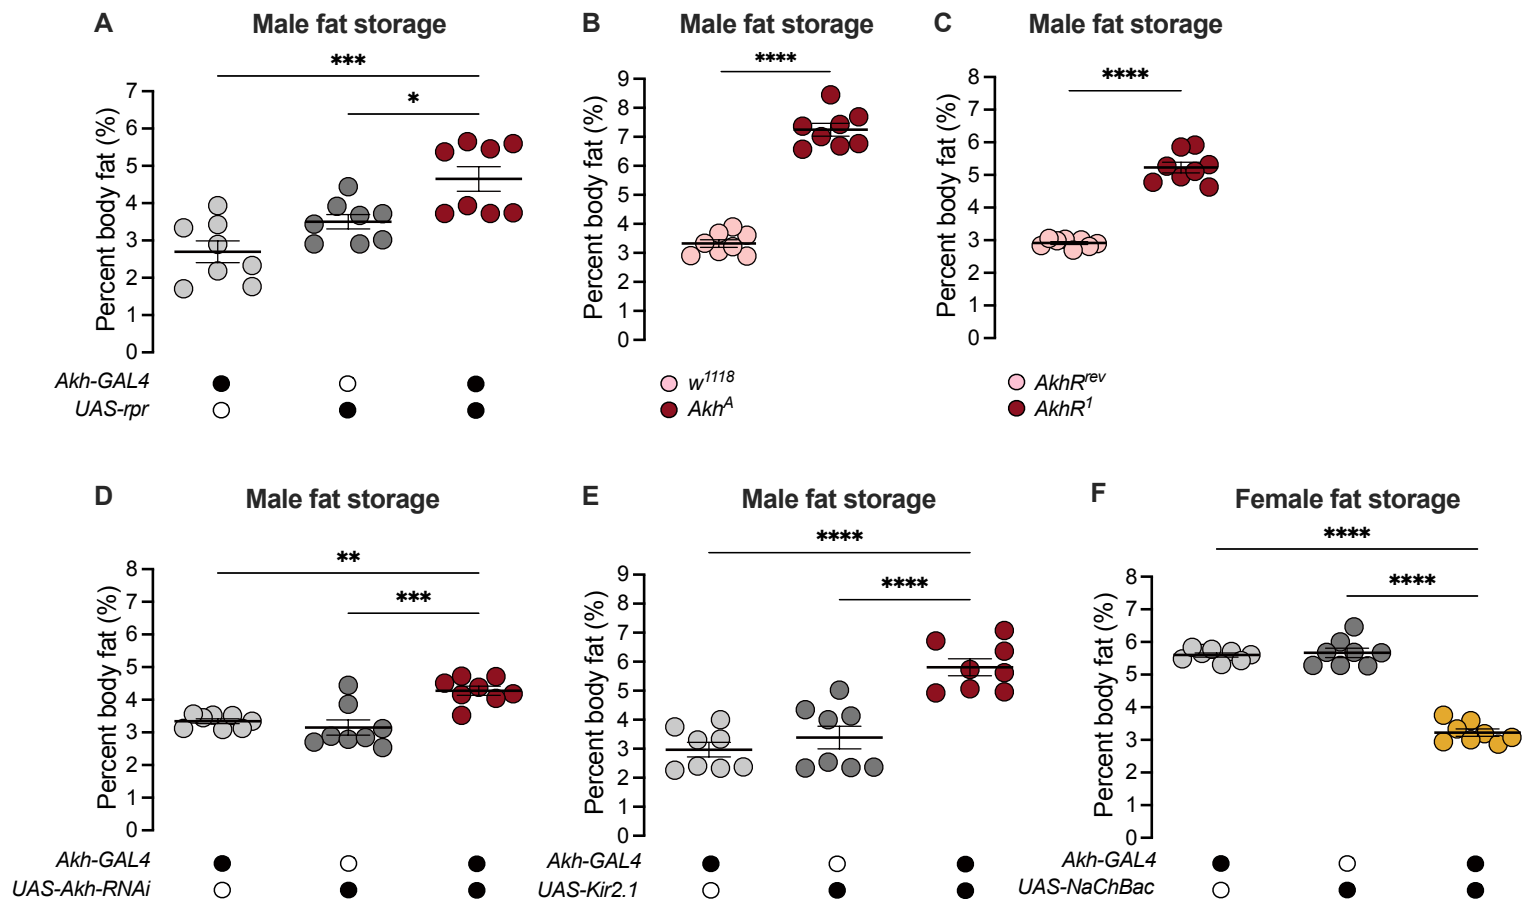

FIGURE 4

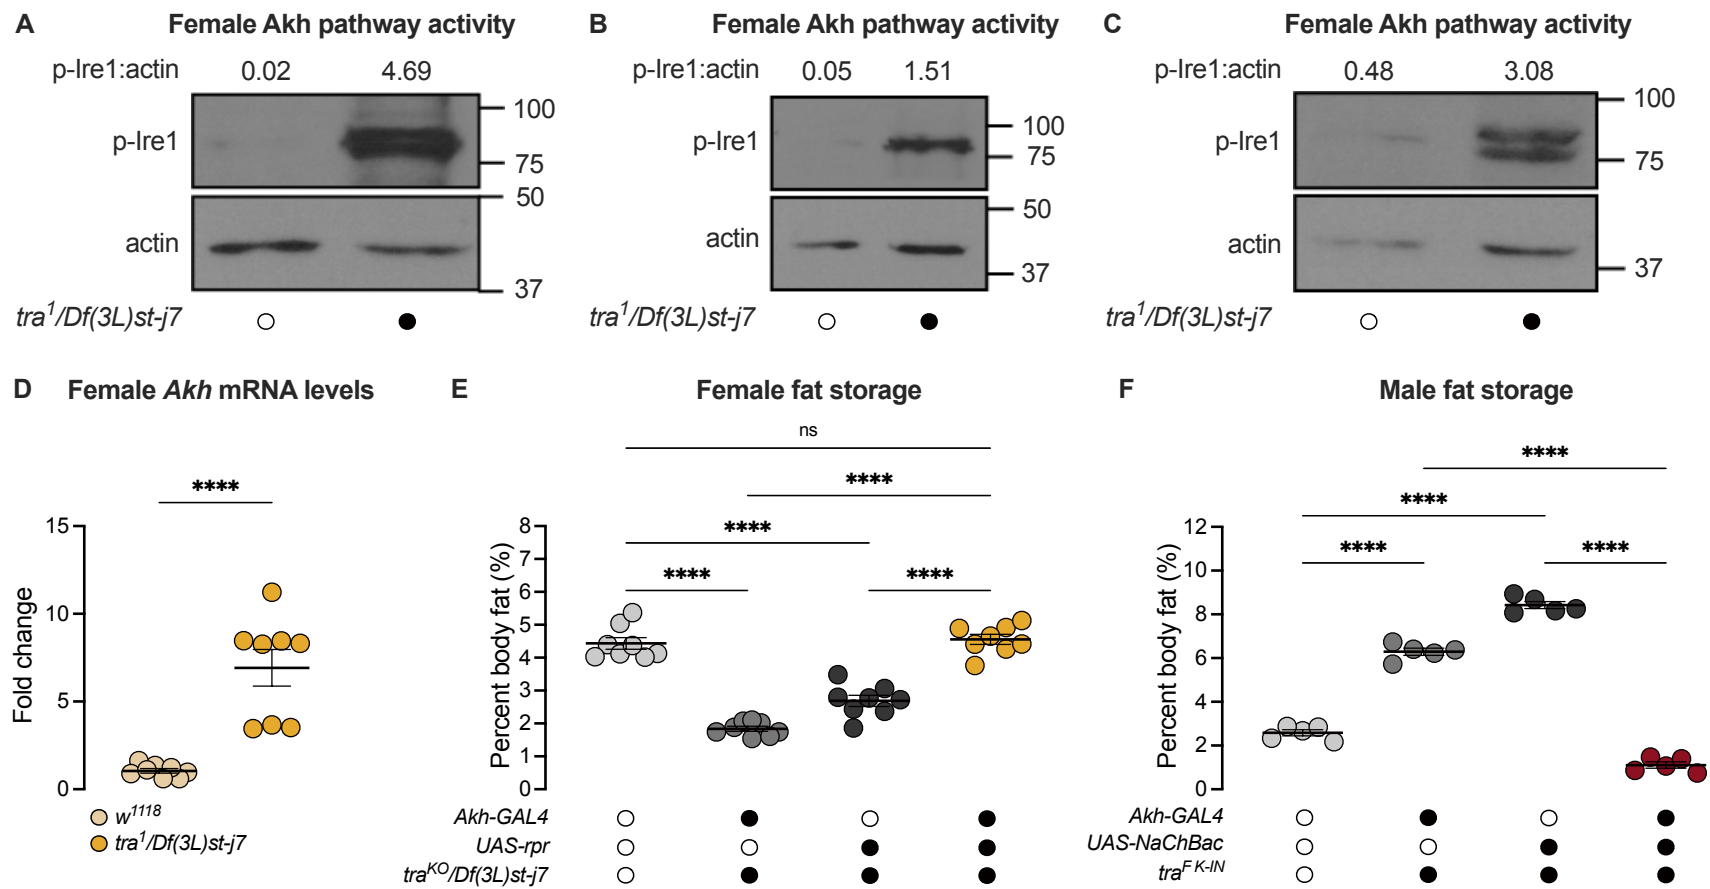

**FIGURE 5**

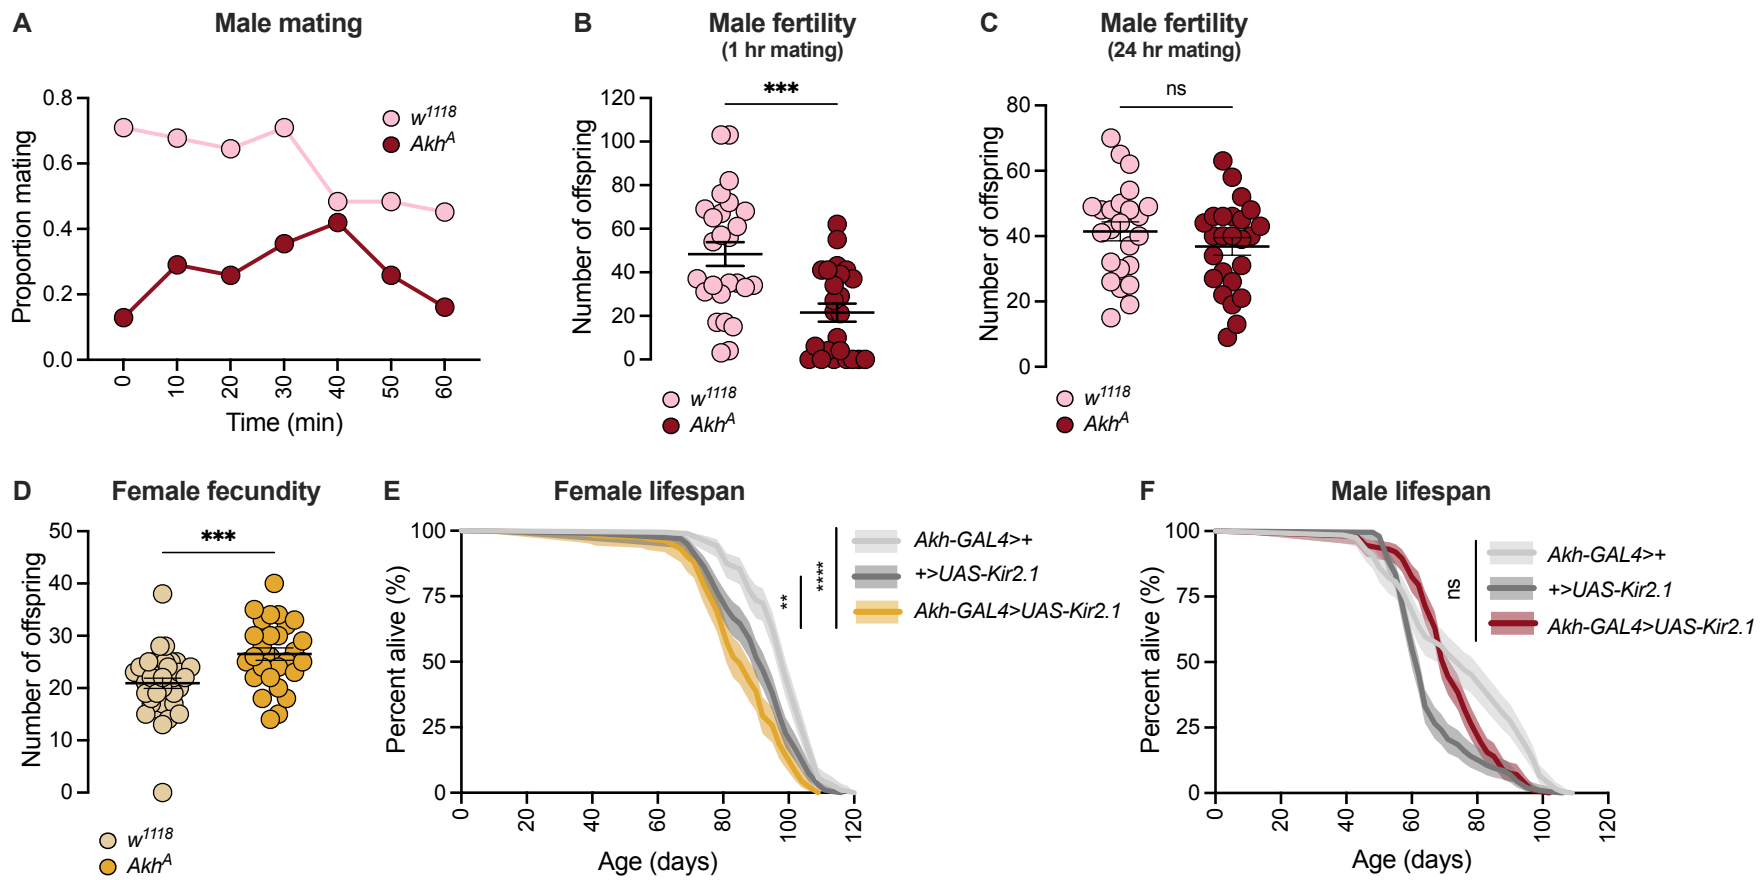

**FIGURE 6**

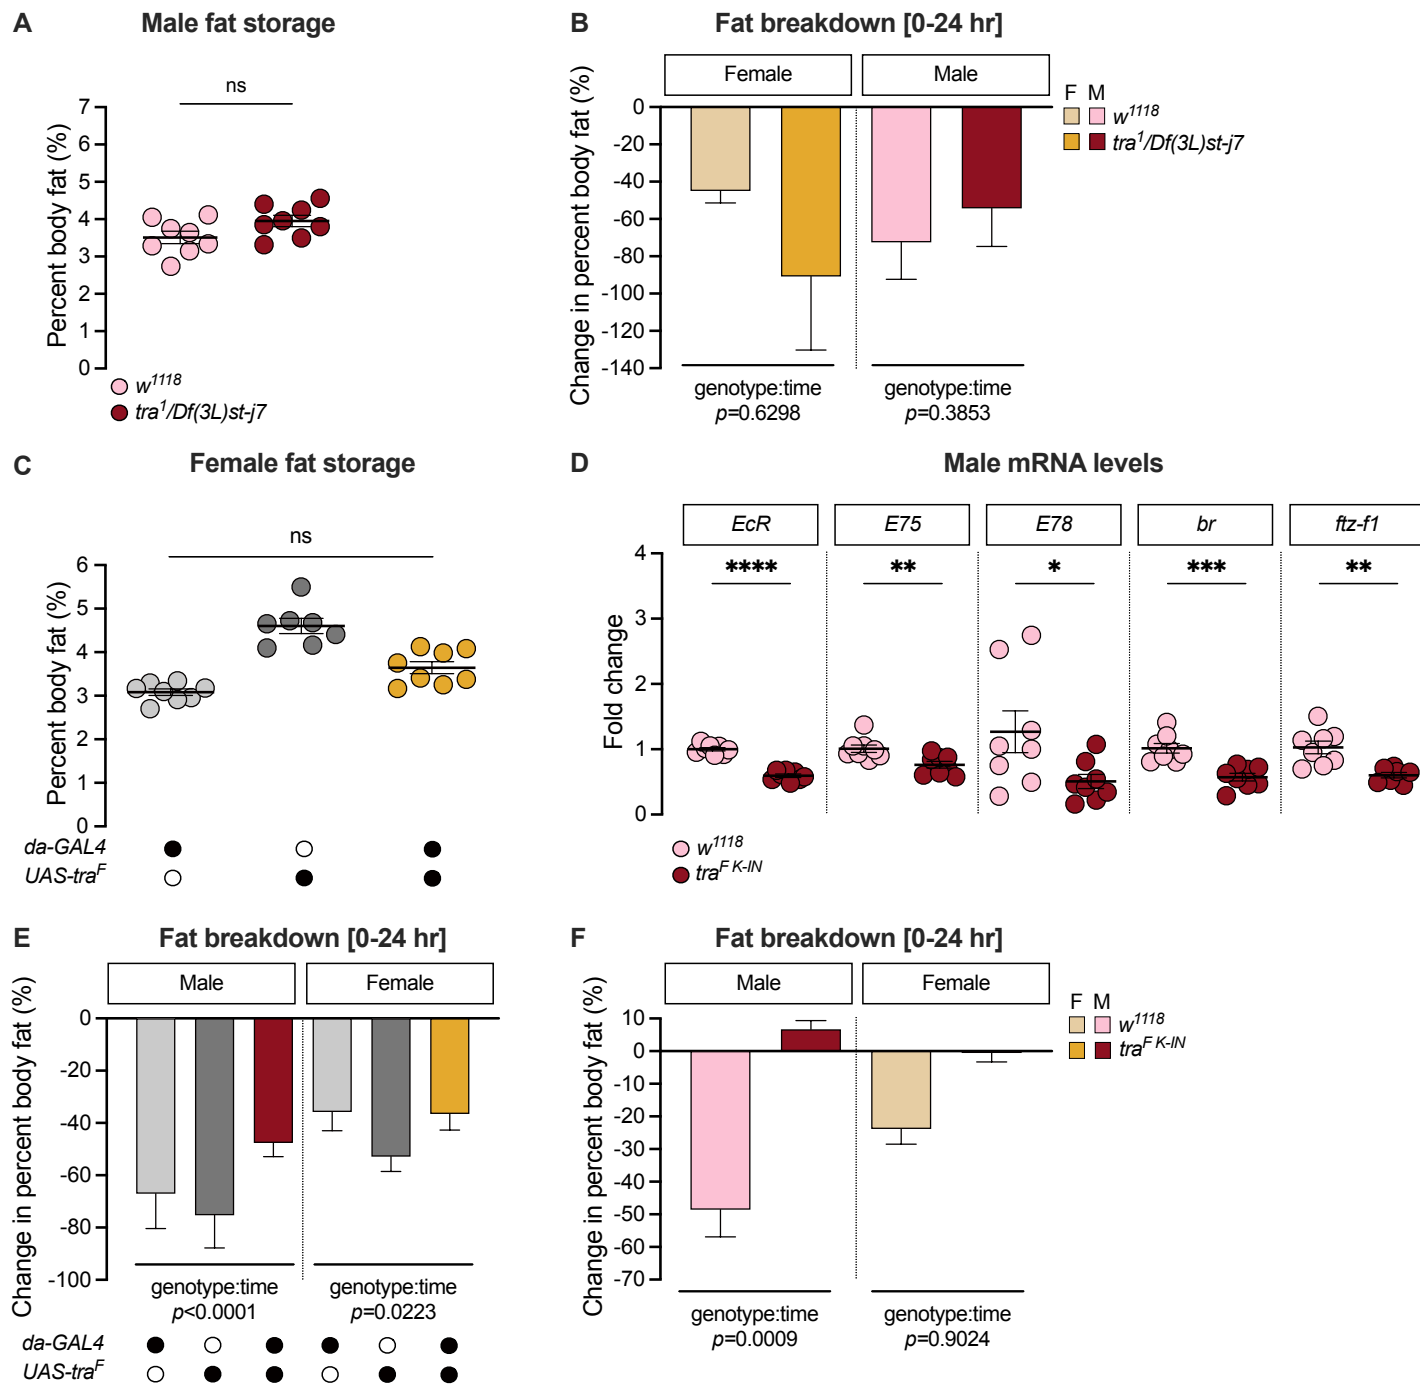

FIGURE 1 - FIGURE SUPPLEMENT 1

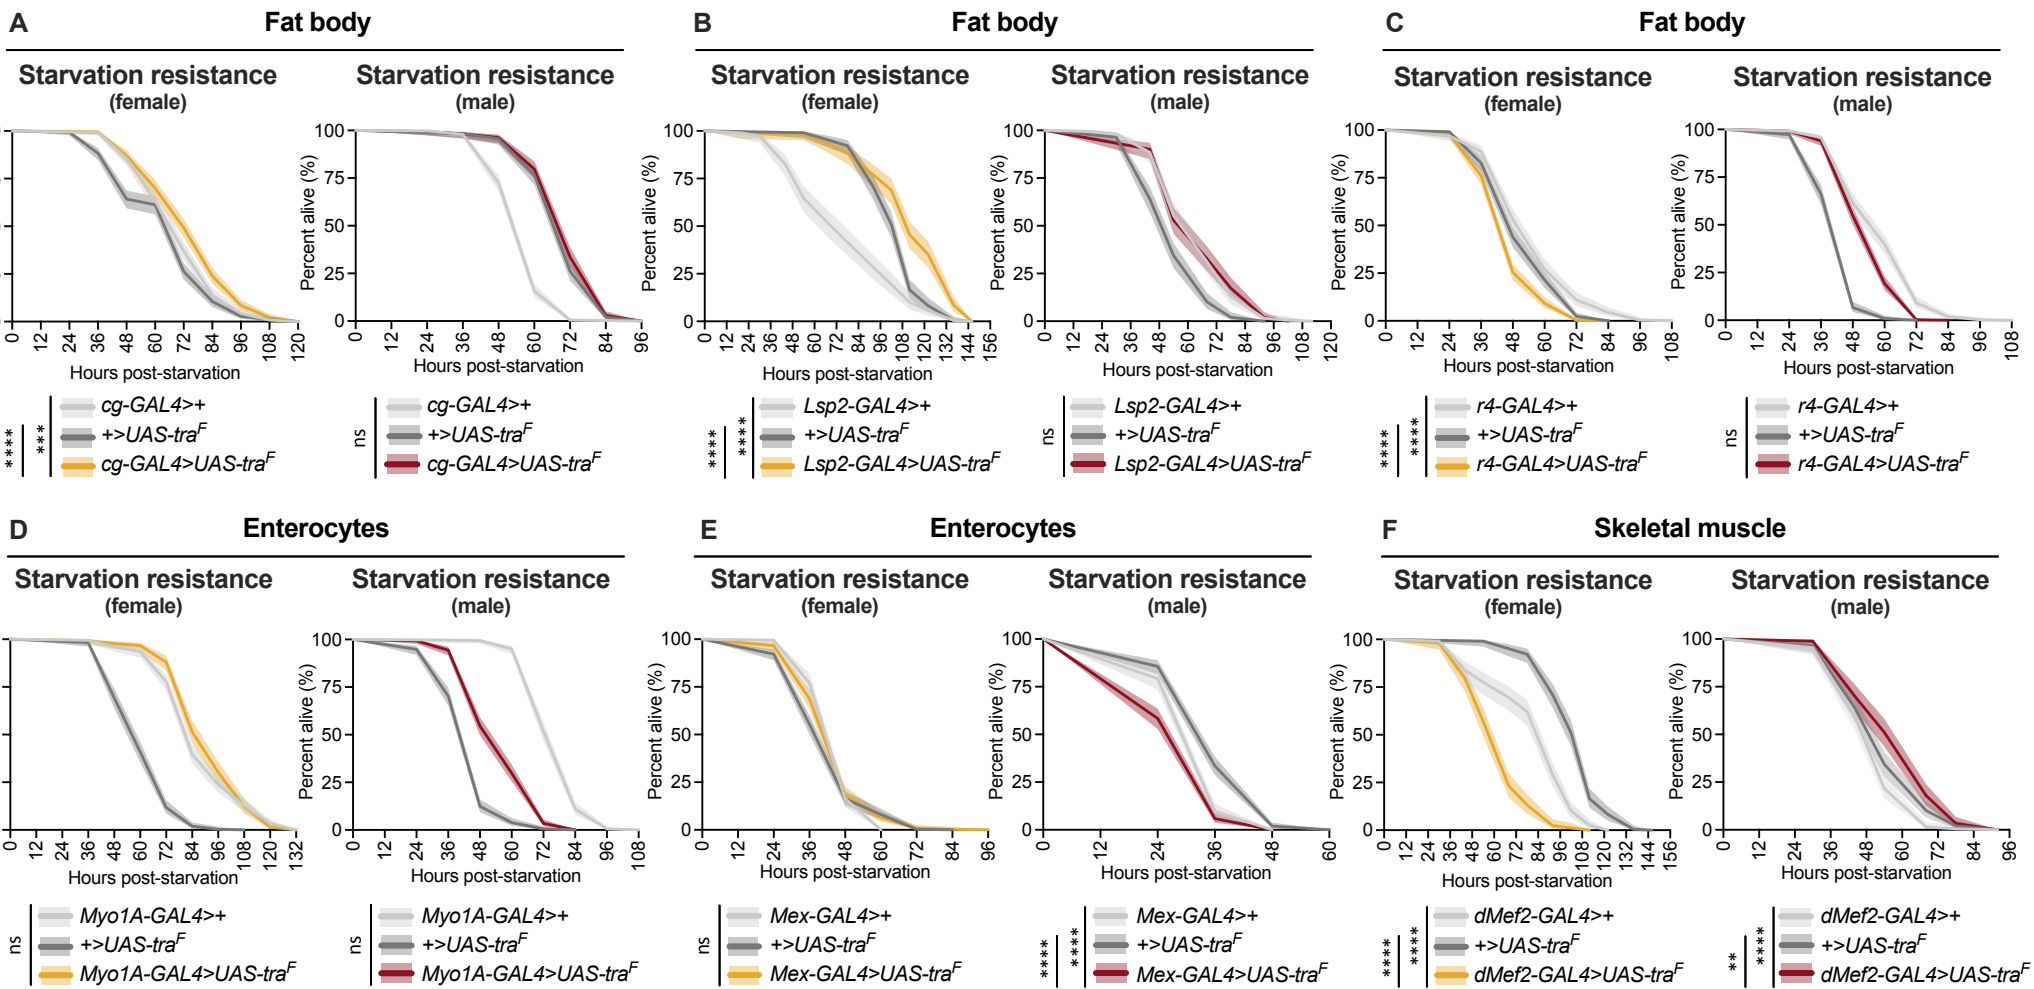

**FIGURE 2 - FIGURE SUPPLEMENT 1**

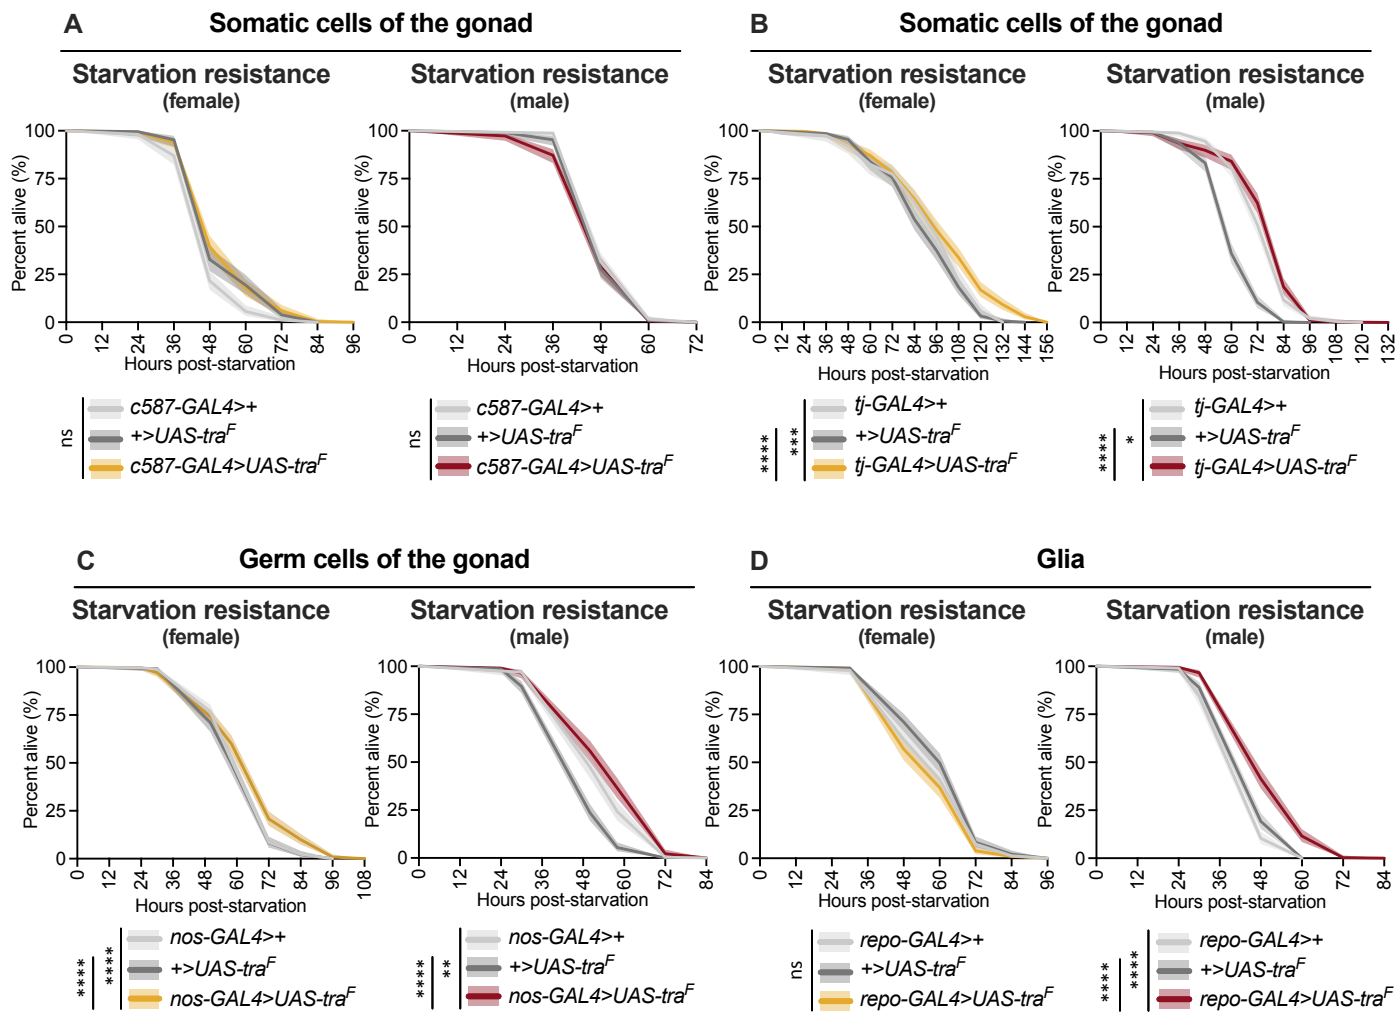

**FIGURE 2 - FIGURE SUPPLEMENT 2**



**A Female starvation resistance**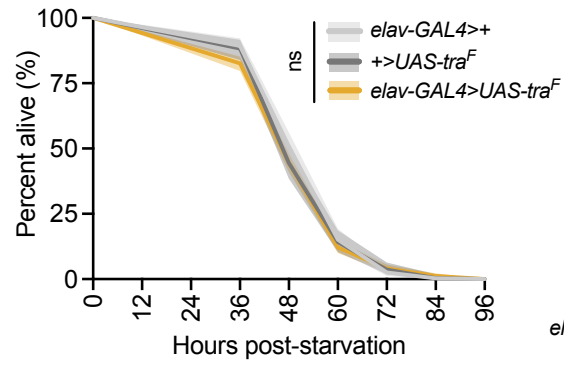**B Female fat storage**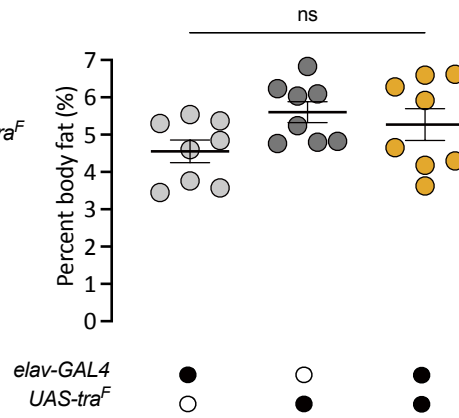**C Fat breakdown [0-24 hr]**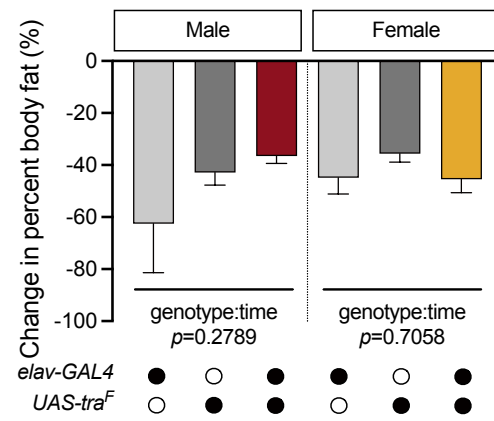

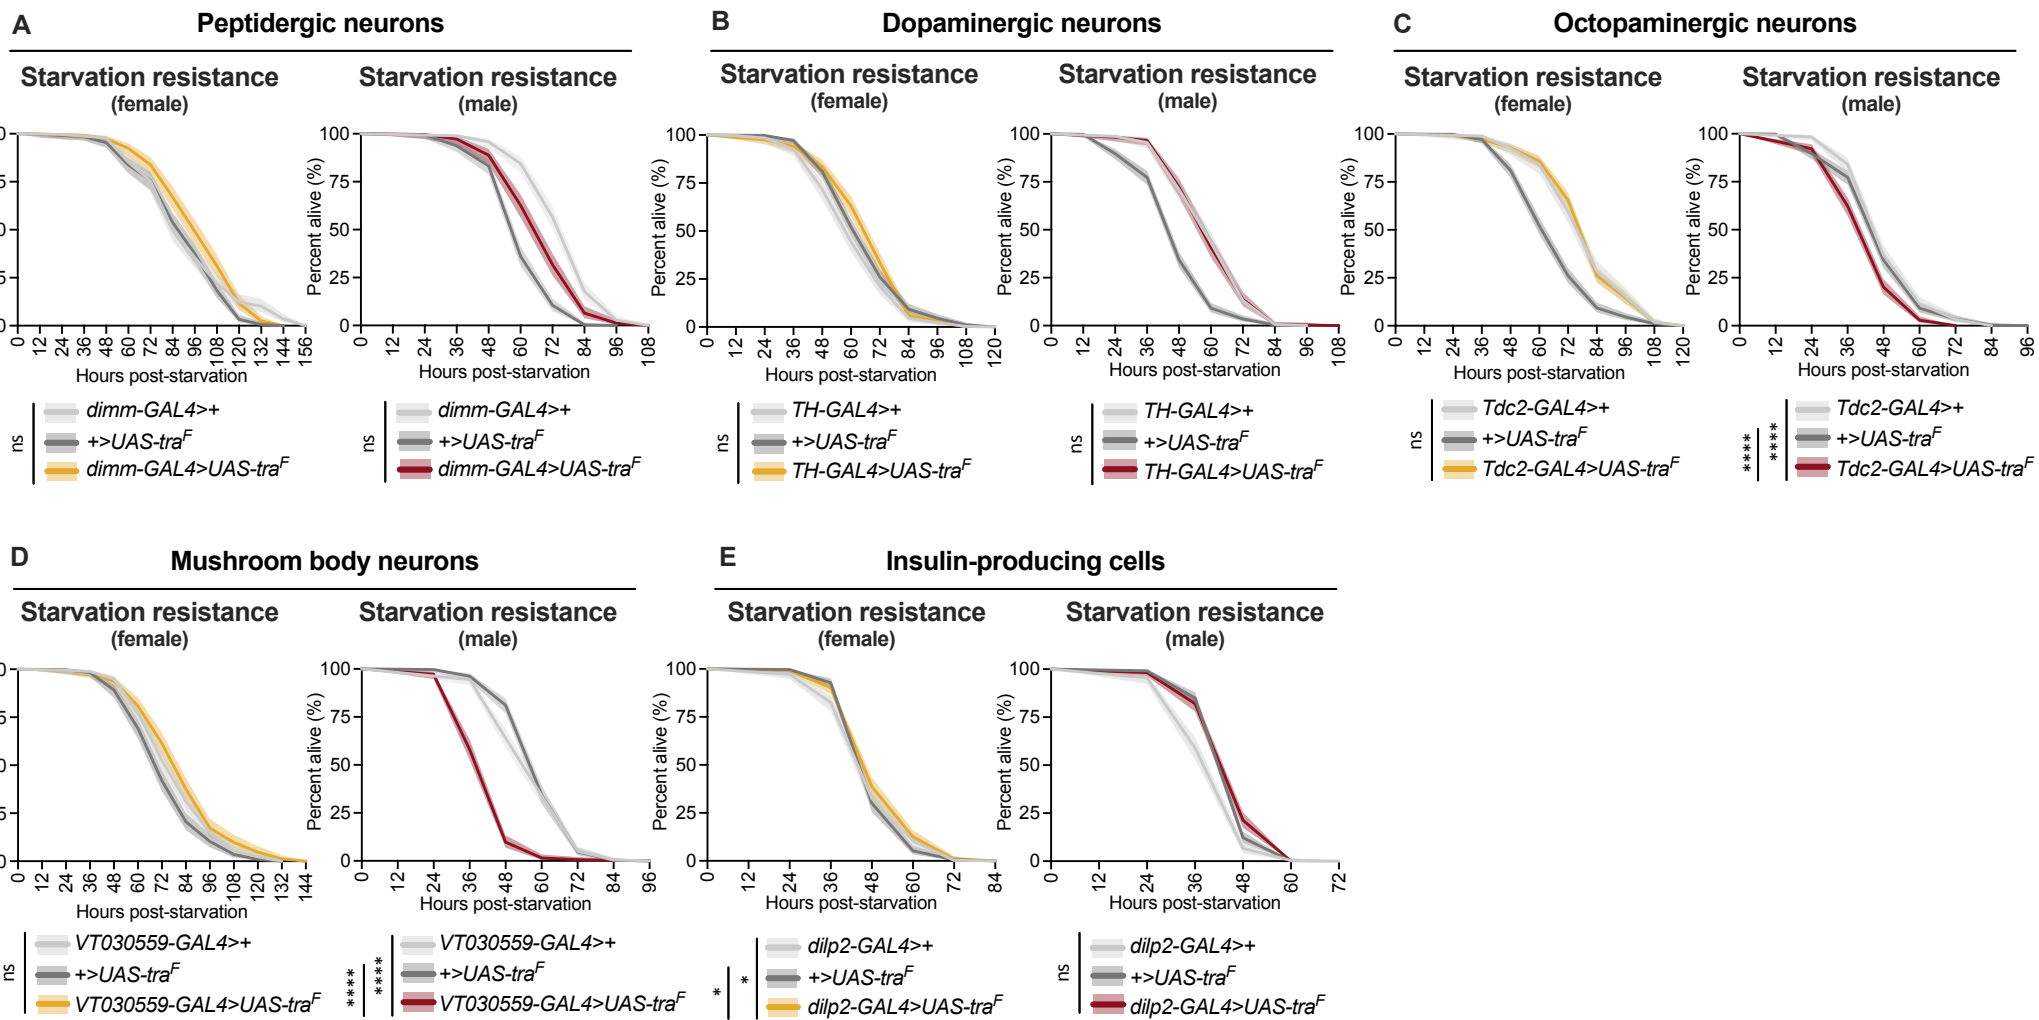

**FIGURE 2 - FIGURE SUPPLEMENT 4**

**A Female starvation resistance**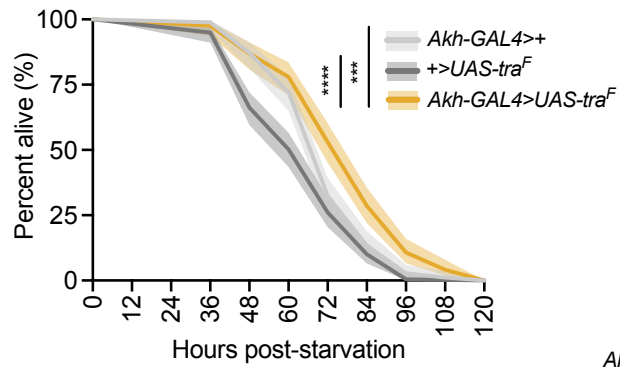**B Female fat storage**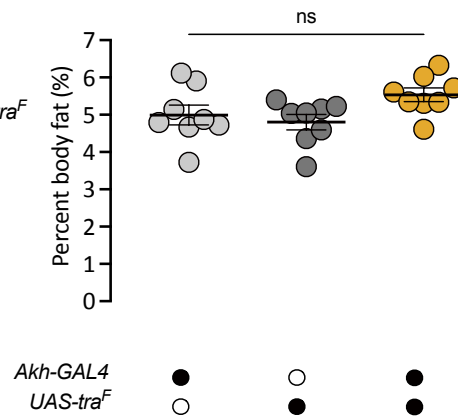**C Fat breakdown [0-24 hr]**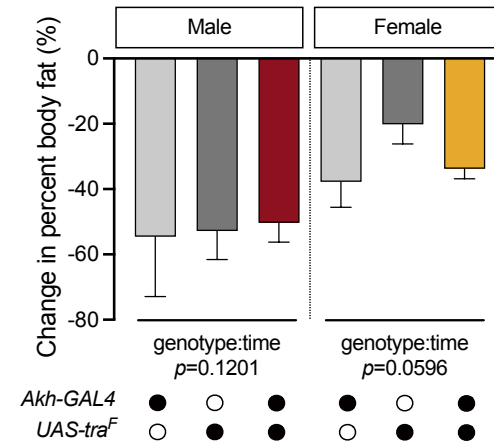

**A GAL4 mRNA levels**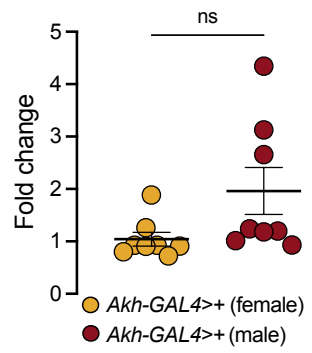**B Akh pathway activity**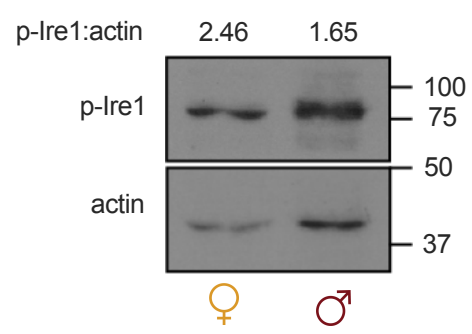

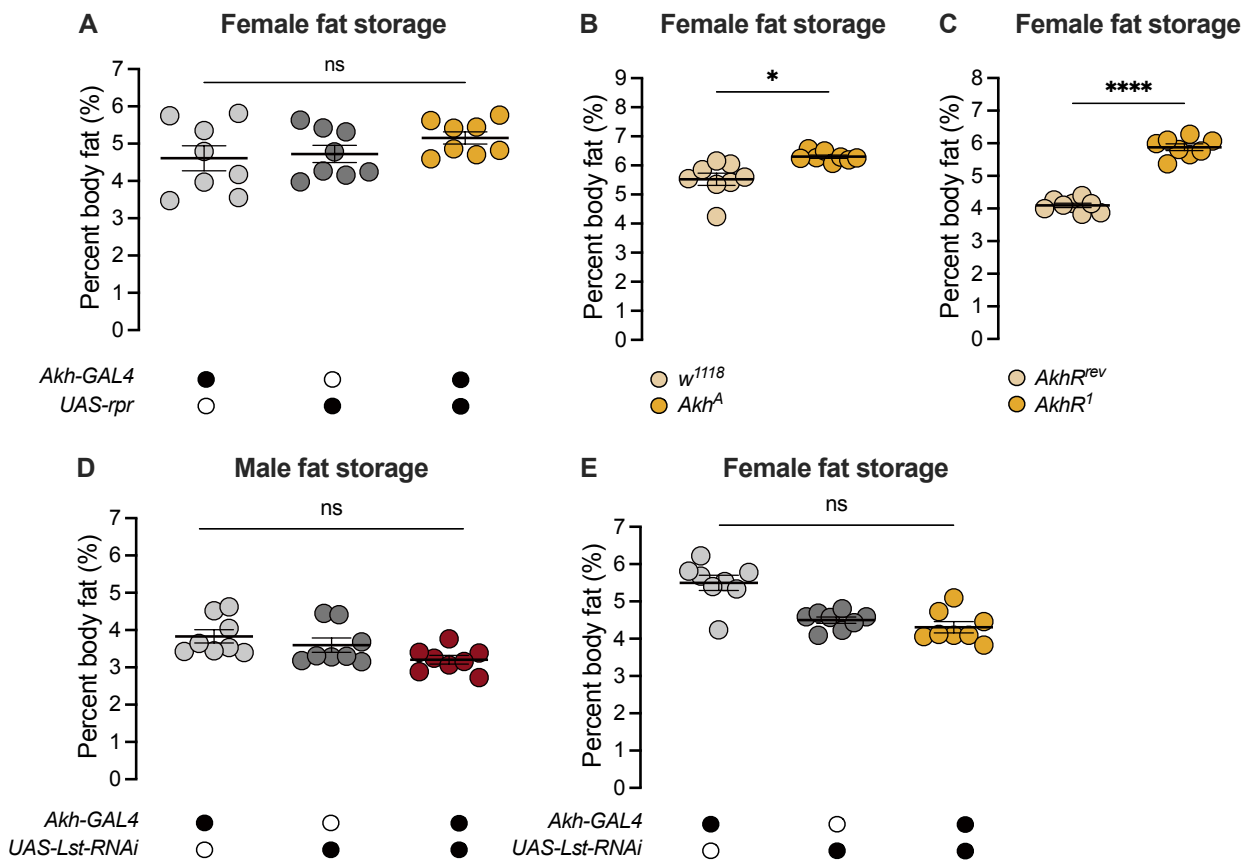

FIGURE 4 - FIGURE SUPPLEMENT 1



**A Male *Akh* mRNA levels**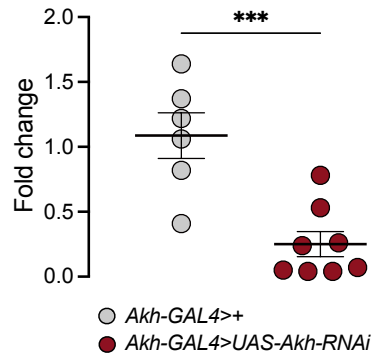**B Female *Akh* mRNA levels**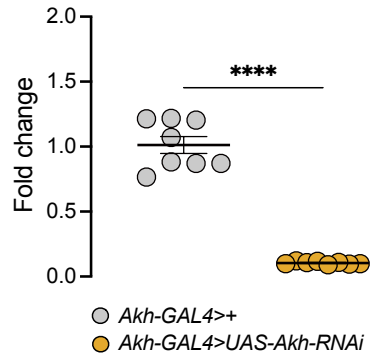**C Female fat storage**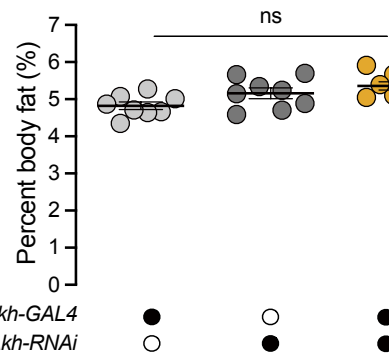**D Female fat storage**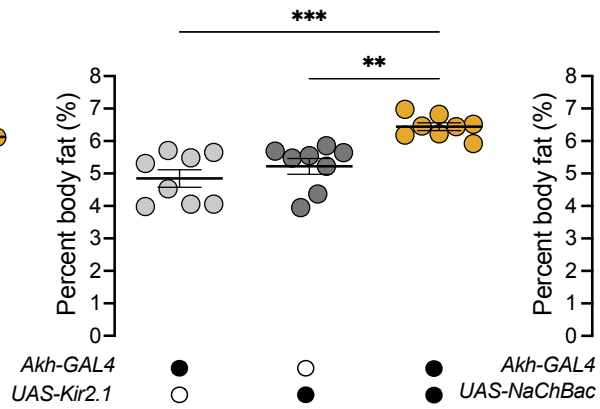**E Male fat storage**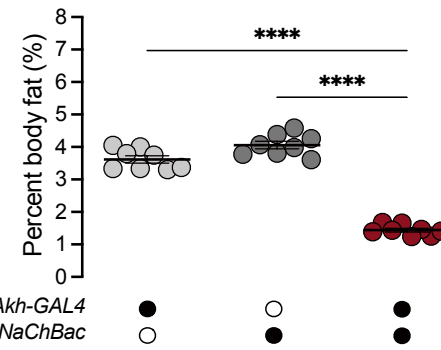



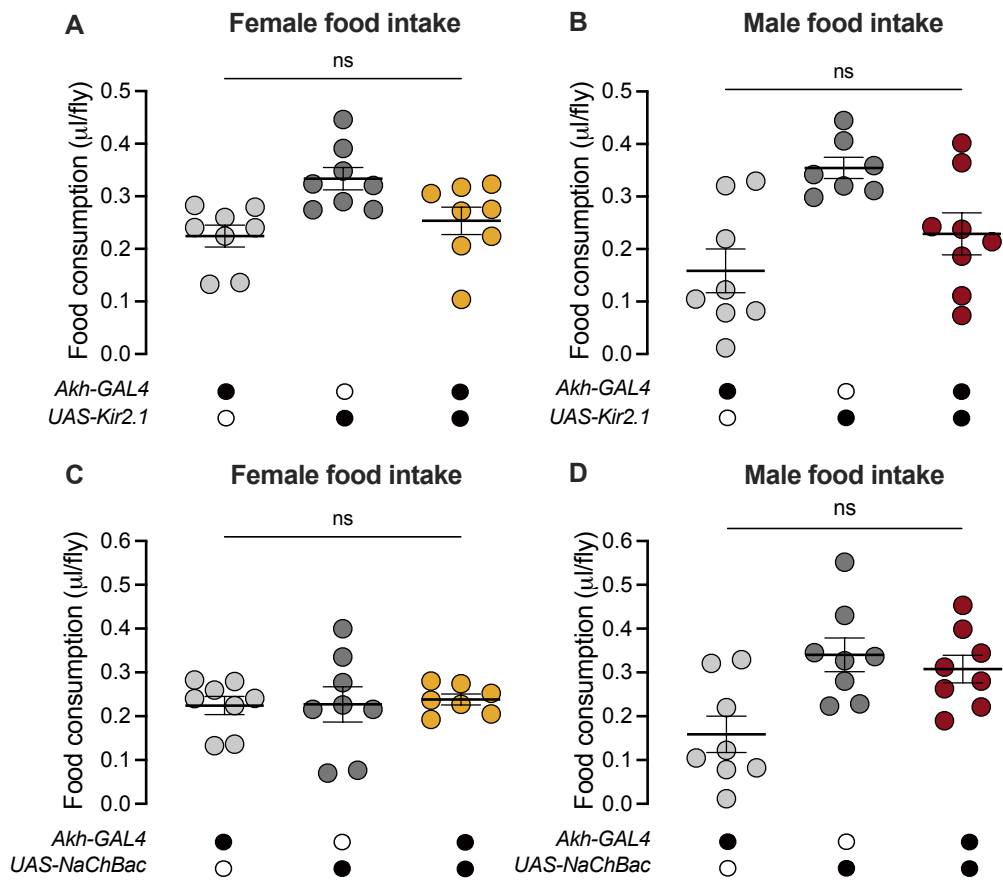

FIGURE 4 - FIGURE SUPPLEMENT 4

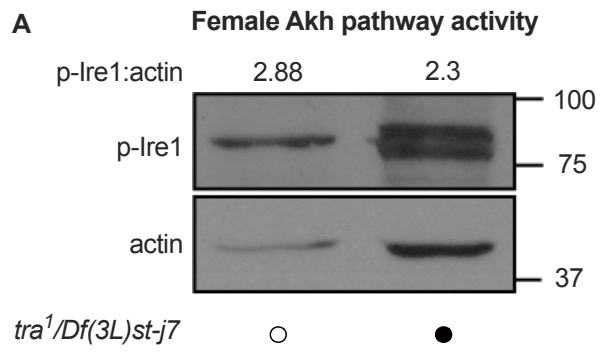

**FIGURE 5 - FIGURE SUPPLEMENT 1**
