# Supplementary material for: Sex determination gene transformer regulates the male-female difference in Drosophila fat storage via the adipokinetic hormone pathway
Source: bioRxiv preprint, doi:10.1101/2021.07.20.453098, version 2 (2021-08-31)
Supplement: Supplementary file 1 [file 453098_file02.xlsx]

## Sheet: Fig 1
tra1/stj7 - fed lipids
Student's t-test	females
F_w1118 vs. F_tra1/stj7	<0.0001
tra1/stj7 - gonadless fed lipids
Student's t-test
	females
w vs. Tra1stj7	<0.0001
traKO/traKO - fed lipids
Student's t-test
	females
w vs. traKO	0.0037
da>traF - fed lipids
1way ANOVA with Tukey's HSD
	males
GAL4 vs. UAS	0.1565
GAL4 vs. tra	<0.0001
UAS vs. tra	<0.0001
traF K-IN - fed lipids
Student's t-test
	males
w vs. traF K-IN	<0.0001
traF K-IN - gonadless fed lipids
Student's t-test
	males
w vs. traF K-IN	<0.0001

## Sheet: Fig 2
tra1/st-j7 - STV resistance
Log-rank test with Bonferroni correction				sample size
	Female			Female
w11118 vs. tra1stj7	<2e-16		w1118	502
			tra1/stj7	344
da>traF - STV resistance
Log-rank test with Bonferroni correction				sample size
	Male			Male
gal4 vs. tra	<2e-16		gal4	201
uas vs. tra	<2e-16		uas	198
gal4 vs. uas	0.06		tra	198
elav>traF - STV resistance
Log-rank test with Bonferroni correction				sample size
	Male			Male
gal4 vs. tra	<2e-16		gal4	248
uas vs. tra	<2e-16		uas	260
gal4 vs. uas	1.7e-06		tra	279
elav>traF - fed lipids
1way ANOVA with Tukey's HSD
	Males
GAL4 vs. UAS	0.7898
GAL4 vs. tra	0.0001
UAS vs. tra	0.0006
Akh>traF - STV resistance
Log-rank test with Bonferroni correction				sample size
	Male			Male
gal4 vs. tra	3.1e-09		gal4	280
uas vs. tra	<2e-16		uas	364
gal4 vs. uas	1.2e-07		tra	333
Akh>traF - fed lipids
1way ANOVA with Tukey's HSD
	Male
GAL4 vs. UAS	0.9174
GAL4 vs. tra	<0.0001
UAS vs. tra	<0.0001

## Sheet: Fig 3
w1118 - Akh mRNA levels
Student's t-test
male vs. female	<0.0001
w1118 - AkhR mRNA levels
Student's t-test
male vs. female	0.0002
Akh>nGFP
Student's t-test
male vs. female	0.1417
Akh>CaLexA - GFP intensity
Student's t-test
male vs. female	0.0438

## Sheet: Fig 4
Akh>reaper - fed lipids
1way ANOVA with Tukey's HSD
	Males
GAL4 vs. UAS	0.1251
GAL4 vs. exp	0.0002
UAS vs. exp	0.0215
Akh^A vs. w1118 - lipids (same experiment as Fig4 Supp1)
one-way ANOVA with Tukey's HSD
F - w1118 vs. M - w1118	<0.0001
F - w1118 vs. F - AKH^A	0.0152
F - w1118 vs. M - AKH^A	<0.0001
M - w1118 vs. F - AKH^A	<0.0001
M - w1118 vs. M - AKH^A	<0.0001
F - AKH^A vs. M - AKH^A	0.0025
AkhR^1 vs. AkhR^rev - fed lipids (same experiment as Fig4 Supp1)
one-way ANOVA with Tukey's HSD
F_AKHRrev vs. M_AKHRrev	<0.0001
F_AKHRrev vs. F_AKHR1	<0.0001
F_AKHRrev vs. M_AKHR1	<0.0001
M_AKHRrev vs. F_AKHR1	<0.0001
M_AKHRrev vs. M_AKHR1	<0.0001
F_AKHR1 vs. M_AKHR1	0.0009
Akh>Akh-RNAi - fed lipids
1way ANOVA with Tukey's HSD
	male
GAL4 vs. UAS	0.6789
GAL4 vs. exp	0.0015
UAS vs. exp	0.0002
Akh>kir2.1 - fed lipids							Akh-GAL4>+ control is shared between Fig4E and Fig4S3E (males); and between Fig4F and Fig4S3D (females)
1way ANOVA with Tukey's HSD				two-way ANOVA
	Females	Males
GAL4 vs. UAS	0.4708	0.6284		Interaction	0.0455
GAL4 vs. exp	0.0001	<0.0001		sex	<0.0001
UAS vs. exp	0.0022	<0.0001		genotype	<0.0001
Akh>nachbac - fed lipids							Akh-GAL4>+ control is shared between Fig4E and Fig4S3E (males); and between Fig4F and Fig4S3D (females)
1way ANOVA with Tukey's HSD
	Females
GAL4 vs. UAS	0.5614
GAL4 vs. exp	<0.0001
UAS vs. exp	<0.0001

## Sheet: Fig 5
w1118 vs. tra1/stj7 - Akh mRNA levels
student's t-test
	female
w vs. tra1/stj7	<0.0001
Akh>reaper in traKO/stj7 - fed lipids
one-way ANOVA with Tukey's HSD
	female
w vs. gal4	<0.0001
w vs. uas	<0.0001
w vs. exp	0.9384
gal4 vs. uas	0.0023
gal4 vs. exp	<0.0001
uas vs. exp	<0.0001
Akh>nachbac in traF K-IN - fed lipids
one-way ANOVA with Tukey's HSD
	male
w vs. gal4	<0.0001
w vs. uas	<0.0001
w vs. exp	<0.0001
gal4 vs. uas	<0.0001
gal4 vs. exp	<0.0001
uas vs. exp	<0.0001

## Sheet: Fig 6
Akh^A vs. w1118 - male fertility (1hr mated)
student's t-test
w vs. Akh^A	0.0003
Akh^A vs. w1118 - male fertility (24hr mated)
student's t-test
w vs. Akh^A	0.2501
Akh^A vs. w1118 - female fecundity (24hr mated)
student's t-test
w vs. Akh^A	0.0006
Akh>kir2.1 - lifespan
log rank test with Bonferroni correction				sample size
	female	male			female	male
gal4 vs. exp	<2e-16	0.00013		gal4	192	196
uas vs. exp	0.0015	7e-06		uas	198	200
gal4 vs. uas	1.2e-06	7.3e-10		exp	160	200

## Sheet: Fig1 S1
tra1/stj7 - fed lipids
Student's t-test	males
M_w1118 vs. M_tra1/stj7	0.0685
tra1/stj7 - STV lipids
2way ANOVA per sex
	female	male
interaction	0.6298	0.3853
time	<0.0001	<0.0001
genotype	<0.0001	0.0083
traF K-IN ecdysone signalling mRNA levels
Student's t-test per gene	ecr	e75	e78	broad	ftz-f1
w vs. traF K-IN	<0.0001	0.0072	0.0408	0.0003	0.002
da>traF - STV lipids
2way ANOVA per sex
	female	male
interaction	<0.0001	0.0223
time	<0.0001	<0.0001
genotype	<0.0001	<0.0001
traF K-IN - STV lipids
2way ANOVA per sex
	female	male
interaction	0.9024	0.0009
time	<0.0001	<0.0001
genotype	<0.0001	<0.0001
da>traF - fed lipids
1way ANOVA with Tukey's HSD
	females
GAL4 vs. UAS	<0.0001
GAL4 vs. tra	0.016
UAS vs. tra	0.0002

## Sheet: Fig2 S1
cg>traF - STV resistance
Log-rank test with Bonferroni correction					sample size
	Female	Male			Female	Male
gal4 vs. tra	0.00028	<2e-16		gal4	397	431
uas vs. tra	5.3e-11	0.17		uas	400	295
gal4 vs. uas	0.00533	<2e-16		tra	413	316
r4>traF - STV resistance
Log-rank test with Bonferroni correction					sample size
	Female	Male			Female	Male
gal4 vs. tra	<2e-16	2.4e-10		gal4	293	382
uas vs. tra	7.6e-08	<2e-16		uas	342	330
gal4 vs. uas	0.00062	<2e-16		tra	402	452
lsp2>traF - STV resistance
Log-rank test with Bonferroni correction					sample size
	Female	Male			Female	Male
gal4 vs. tra	<2e-16	1		gal4	190	199
uas vs. tra	1.3e-09	1.4e-11		uas	206	198
gal4 vs. uas	1.7e-14	3.8e-10		tra	187	202
myo1a>traF - STV resistance
Log-rank test with Bonferroni correction					sample size
	Female	Male			Female	Male
gal4 vs. tra	0.2	<2e-16		gal4	383	380
uas vs. tra	<2e-16	<2e-16		uas	313	363
gal4 vs. uas	<2e-16	<2e-16		tra	268	409
mex>traF - STV resistance
Log-rank test with Bonferroni correction					sample size
	Female	Male			Female	Male
gal4 vs. tra	1	2.8e-06		gal4	226	250
uas vs. tra	0.061	<2e-16		uas	374	362
gal4 vs. uas	0.167	7.2e-10		tra	326	322
dMef2>traF - STV resistance
Log-rank test with Bonferroni correction					sample size
	Female	Male			Female	Male
gal4 vs. tra	<2e-16	2.2e-09		gal4	200	198
uas vs. tra	<2e-16	0.0081		uas	206	198
gal4 vs. uas	<2e-16	0.006		tra	168	178

## Sheet: Fig2 S2
c587>traF - STV resistance
Log-rank test with Bonferroni correction					sample size
	Female	Male			Female	Male
gal4 vs. tra	5.7e-08	0.011		gal4	268	400
uas vs. tra	1	0.747		uas	232	329
gal4 vs. uas	3.9e-06	0.222		tra	288	318
tj>traF - STV resistance
Log-rank test with Bonferroni correction					sample size
	Female	Male			Female	Male
gal4 vs. tra	0.00097	0.019		gal4	234	349
uas vs. tra	2.1e-07	<2e-16		uas	333	333
gal4 vs. uas	0.29786	<2e-16		tra	349	327
nos>traF - STV resistance
Log-rank test with Bonferroni correction					sample size
	Female	Male			Female	Male
gal4 vs. tra	6e-05	0.0037		gal4	398	293
uas vs. tra	6.7e-06	<2e-16		uas	374	364
gal4 vs. uas	1	5.1e-15		tra	442	313
repo>traF - STV resistance
Log-rank test with Bonferroni correction					sample size
	Female	Male			Female	Male
gal4 vs. tra	0.41994	<2e-16		gal4	300	329
uas vs. tra	0.00022	7.2e-16		uas	374	344
gal4 vs. uas	0.06048	0.0024		tra	309	355

## Sheet: Fig2 S3
elav>traF - STV resistance
Log-rank test with Bonferroni correction				sample size
	Female			Female
gal4 vs. tra	0.3		gal4	318
uas vs. tra	1		uas	274
gal4 vs. uas	1		tra	749
elav>traF - fed lipids
1way ANOVA with Tukey's HSD
	Females
GAL4 vs. UAS	0.102
GAL4 vs. tra	0.3224
UAS vs. tra	0.7754
elav>traF - STV lipids
2way ANOVA per sex
	female	male
interaction	0.7058	0.2789
time	<0.0001	<0.0001
genotype	0.0009	<0.0001

[truncated: 7 more sheets: Fig2 S4, Fig2 S5, Fig3 S1, Fig4 S1, Fig4 S2, Fig4 S3, Fig4 S4]
