# Supplementary material for: Sex determination gene transformer regulates the male-female difference in Drosophila fat storage via the adipokinetic hormone pathway
Source: bioRxiv preprint, doi:10.1101/2021.07.20.453098, version 2 (2021-08-31)
Supplement: Supplementary file 3 [file 453098_file04.xlsx]

## Sheet: Sheet1
Target gene name	Forward Primer	Reverse Primer
Akh	TTTCGAGACACAGCAGGGCA	GGTGCTTGCAGTCCAGAAA
AkhR	ACAATCCGTCGGTGAACA	CATCACCTGGCCTCTTCCAT
GAL4	CACCGACGCTAATGATGTTG	TGGAACCTGACTCGAAGACC
EcR	GAGAACGAGAGCCAAACGGA	CGACGAGCAGGCCTTTAGTA
E75	GCAGCAGATCGGAATACTCAATA	CACTCGTTCTTCTCGTTGCC
E78	ACAAAATGGGATTGCCAGCAC	TCCAGTGTCAATGTCGCCTC
br	CGATCAAGCACCACAACAACA	TGATGGAGATTCCGTTGCCG
ftz-f1	GGCATGAAGCTAGAGGCTGT	CCGTTTGTACATGGGTCCGA
