# Supplementary material for: Sex determination gene transformer regulates the male-female difference in Drosophila fat storage via the adipokinetic hormone pathway
Source: bioRxiv preprint, doi:10.1101/2021.07.20.453098, version 2 (2021-08-31)
Supplement: Supplementary file 4 [file 453098_file05.xlsx]

## Sheet: Sheet1
For 1L of standard fly food media
Ingredient	Amount
H2O	1 L
White sugar	20.5 g
D-glucose	70.9 g
Cornmeal	48.5 g
Yeast	30.3 g
CaCl2-2H2O	0.5 g
MgSO4-7H2O	0.5 g
Agar	4.6 g
Propionic acid (836 ml per 1L)	5.9 ml
Phosphoric acid (83 ml per 1L)	5.9 ml
